# Supplementary material for: Anaemia and associated factors among older adults in an urban district in China: a large-scale cross-sectional study
Source: PubMed Central journal article supplement — BMJ Open. 2022 Mar 9;12(3):e056100. doi: 10.1136/bmjopen-2021-056100 (PMC8915324; doi:10.1136/bmjopen-2021-056100), 2022-03-09
Supplement: bmjopen-2021-056100.draft_revisions.pdf [file bmjopen-2021-056100.draft_revisions.pdf]

# BMJ Open

BMJ Open is committed to open peer review. As part of this commitment we make the peer review history of every article we publish publicly available.

When an article is published we post the peer reviewers' comments and the authors' responses online. We also post the versions of the paper that were used during peer review. These are the versions that the peer review comments apply to.

The versions of the paper that follow are the versions that were submitted during the peer review process. They are not the versions of record or the final published versions. They should not be cited or distributed as the published version of this manuscript.

BMJ Open is an open access journal and the full, final, typeset and author-corrected version of record of the manuscript is available on our site with no access controls, subscription charges or pay-per-view fees (<http://bmjopen.bmj.com>).

If you have any questions on BMJ Open's open peer review process please email [info.bmjopen@bmj.com](mailto:info.bmjopen@bmj.com)

# BMJ Open

## **Anemia and associated factors among the elderly in an urban district in China: a large-scale cross-sectional study**

|                               |                                                                                                                                                                                                                                     |
|-------------------------------|-------------------------------------------------------------------------------------------------------------------------------------------------------------------------------------------------------------------------------------|
| Journal:                      | <i>BMJ Open</i>                                                                                                                                                                                                                     |
| Manuscript ID                 | bmjopen-2021-056100                                                                                                                                                                                                                 |
| Article Type:                 | Original research                                                                                                                                                                                                                   |
| Date Submitted by the Author: | 03-Aug-2021                                                                                                                                                                                                                         |
| Complete List of Authors:     | Ni, Wenqing; Shenzhen Center for Chronic Disease Control<br>Yuan, Xueli; Shenzhen Center for Chronic Disease Control<br>Sun, Yuanying<br>Zhang, Hong<br>Zhang, Yan<br>Xu, Jian; Shenzhen Nanshan Center for Chronic Disease Control |
| Keywords:                     | NUTRITION & DIETETICS, Anaemia < HAEMATOLOGY, EPIDEMIOLOGY                                                                                                                                                                          |
|                               |                                                                                                                                                                                                                                     |

SCHOLARONE™  
Manuscripts

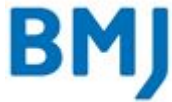

I, the Submitting Author has the right to grant and does grant on behalf of all authors of the Work (as defined in the below author licence), an exclusive licence and/or a non-exclusive licence for contributions from authors who are: i) UK Crown employees; ii) where BMJ has agreed a CC-BY licence shall apply, and/or iii) in accordance with the terms applicable for US Federal Government officers or employees acting as part of their official duties; on a worldwide, perpetual, irrevocable, royalty-free basis to BMJ Publishing Group Ltd ("BMJ") its licensees and where the relevant Journal is co-owned by BMJ to the co-owners of the Journal, to publish the Work in this journal and any other BMJ products and to exploit all rights, as set out in our [licence](#).

The Submitting Author accepts and understands that any supply made under these terms is made by BMJ to the Submitting Author unless you are acting as an employee on behalf of your employer or a postgraduate student of an affiliated institution which is paying any applicable article publishing charge ("APC") for Open Access articles. Where the Submitting Author wishes to make the Work available on an Open Access basis (and intends to pay the relevant APC), the terms of reuse of such Open Access shall be governed by a Creative Commons licence – details of these licences and which [Creative Commons](#) licence will apply to this Work are set out in our licence referred to above.

Other than as permitted in any relevant BMJ Author's Self Archiving Policies, I confirm this Work has not been accepted for publication elsewhere, is not being considered for publication elsewhere and does not duplicate material already published. I confirm all authors consent to publication of this Work and authorise the granting of this licence.

1  
2  
3  
4 1 **Anemia and associated factors among the elderly in an urban**  
5  
6 2 **district in China: a large-scale cross-sectional study**  
7  
8  
9 3

10  
11 4 Wenqing Ni<sup>1#</sup>, Xueli Yuan<sup>1#</sup>, Yuanying Sun<sup>1</sup>, Hongmin Zhang<sup>1</sup>,  
12  
13  
14 5 Yan Zhang<sup>1</sup>, Jian Xu<sup>1</sup>  
15

16  
17 6 <sup>1</sup>Department of Elderly Health Management, Shenzhen Center for Chronic Disease  
18  
19 7 Control, Shenzhen, Guangdong, 518020, China

20  
21 8 # These authors contributed equally to this work.  
22

23 9  
24 10 \*Corresponding author :

25 11 Jian Xu, Ph.D.

26 12 Shenzhen Center for Chronic Disease Control

27 13 No.2021, Buxin Rd. Shenzhen, Guangdong 518020, P.R. China  
28  
29 14

30 15 Tel: 86-755-25506942

31 16 Fax: 86-755-25506942

32 17 E-mail: [anniexu73@126.com](mailto:anniexu73@126.com)  
33  
34 18  
35 19

36 20 Tel: 86-755-25506942

37 21 Fax: 86-755-25506942

38 22 E-mail: [1498384005@qq.com](mailto:1498384005@qq.com)  
39  
40 23  
41 24  
42 25  
43 26  
44 27  
45 28  
46 29  
47 30  
48  
49  
50  
51  
52  
53  
54  
55  
56  
57  
58  
59  
60

1  
2  
3  
4  
5  
6  
7  
8  
9  
10  
11  
12  
13  
14  
15  
16  
17  
18  
19  
20  
21  
22  
23  
24  
25  
26  
27  
28  
29  
30  
31  
32  
33  
34  
35  
36  
37  
38  
39  
40  
41  
42  
43  
44  
45  
46  
47  
48  
49  
50  
51  
52  
53  
54  
55  
56  
57  
58  
59  
60

1 **Abstract**

2 **Objective:** Anemia leads to poor health outcomes in the elderly; however, most  
3 current research in China has focused on younger adults. The present study aimed to  
4 investigate the prevalence of anemia and its associated risk factors in elderly  
5 individuals in an urban district in China.

6 **Design:** A cross-sectional study.

7 **Setting:** A urbanization region, Shenzhen of China.

8 **Participants:** A total of 121,981 participants aged  $\geq 65$  years were recruited at local  
9 community health service centers in Shenzhen from January to December 2018.

10 **Primary outcomes:** Their hemoglobin (Hb) levels and the prevalence of anemia were  
11 analyzed and potential associated factors were evaluated.

12 **Results:** The mean Hb level was  $13.64 \pm 1.67$ g/dL and the prevalence of anemia was  
13 15.43%. Anemia was positively associated with older age, being underweight (odds  
14 ratio (*OR*): 2.06, 95% confidence interval (*CI*): 1.93–2.20), diabetes (*OR*: 1.23, 95%  
15 *CI*: 1.19–1.28), and chronic kidney disease (*OR*: 1.41, 95% *CI*: 1.36–1.46), and  
16 inversely with higher education level, current-smoker (*OR*: 0.84, 95% *CI*: 0.78–0.89),  
17 non-habitual drinker (*OR*: 0.86, 95% *CI*: 0.81–0.92), habitual drinker (*OR*: 0.81, 95%  
18 *CI*: 0.75–0.87), overweight (*OR*: 0.67, 95% *CI*: 0.64–0.70), obesity (*OR*: 0.57, 95%  
19 *CI*: 0.53–0.61), central obesity (*OR*: 0.86, 95% *CI*: 0.82–0.89), hypertension (*OR*:  
20 0.86, 95% *CI*: 0.83–0.89), and dyslipidemia (*OR*: 0.81, 95% *CI*: 0.78–0.84).

21 **Conclusion:** Anemia is prevalent among people aged 65 years and older in China.  
22 Prevention, screening of key populations, and treatment of senile anemia should be a  
23 top priority in Shenzhen, and should be listed as important public health intervention  
24 measures for implementation.

25 **Keywords:** elderly, anemia, epidemiologic study, risk factor

1  
2  
3  
4 1 **Strengths and limitations of this study**

5 2 ■ This is the first large-scale cross-sectional study to assess the prevalence of anemia  
6 and its factors in an urban district in China.

7 3  
8 4 ■ This study had a sufficient sample size to detect statistical significance in the  
9 prevalence of anemia among elderly.

10 5  
11 6 ■ Convenience sampling was used to enroll the population sample.

12 7 ■ The data set used in this study did not provide information on dietary behaviour of  
13 the participants.  
14

15 9

16  
17  
18 10

19  
20  
21 11

22  
23 12

24  
25  
26 13

27  
28 14

29  
30  
31 15

32  
33 16

34  
35  
36 17

37  
38 18

39  
40  
41 19

42  
43  
44 20

45  
46 21

47  
48  
49 22

50  
51 23

52  
53  
54 24

55  
56  
57 25

58  
59 26  
60

## 1. Introduction

Anemia, characterized by decreased hemoglobin (Hb) levels, occurs when low numbers of red blood cells reduce the ability of the blood to carry oxygen to meet the body's physiological needs. Although anemia may occur at any stage of life, older people are particularly vulnerable,<sup>1, 2</sup> and anemia in the elderly is a risk factor for a variety of adverse health outcomes, such as hospitalization, disability, and death.<sup>1, 3-5</sup> Anemia is also an independent risk factor for declining physical performance, and has a negative impact on quality of life, physical function, and muscle strength in older people.<sup>6-8</sup>

Globally, 11.0% of men and 10.2% of women aged  $\geq 65$  years are anemic<sup>9</sup>. Ruan et al. revealed that the prevalence of anemia among middle-aged and elderly residents in China was 31.0%,<sup>10</sup> while Qin et al. reported a prevalence of 12.86% among similar populations from 2011 to 2012.<sup>11</sup> Although China has seen a significant reduction in anemia among middle-aged and elderly residents in the past decade, its occurrence among the elderly cannot be neglected.

A total of 150 million Chinese were aged 65 years or above in 2016, accounting for 10.8% of the population.<sup>12</sup> Improving anemia in the elderly thus has important public health implications. Previous studies have investigated the prevalence of anemia in middle-aged and elderly people, but there is a lack of large-scale studies on anemia in the urban elderly population.<sup>10, 11, 13</sup> The current study therefore aimed to assess the prevalence of anemia and associated factors among elderly people in an urban district in China.

## 2. Materials and methods

### a) Study population

We used convenience sampling to select our population sample by recruiting people aged 65 years and older from the lists of all residents registered at local community health centers in Shenzhen, China, from January 2018 through December 2018. Recruitment activities include pasting posters or placing foldings in local community health centers and other public places. Electronic posters also be distributed via all the open WeChat groups of local community health centers' staff, to make the survey available to the close contacts easily. Moreover, the staff of the local community health centers recruited the elderly adults in their service community to participate in the survey by telephone. The eligibility criteria were as follows: (1) having lived in Shenzhen for more than 6 months; and (2) able to participate in the study and give informed consent. A total of 141,684 individuals were recruited in this study, accounting for 36.9% (141,684/383,700) of the resident elderly population in Shenzhen according to the 2015 population census. Data were collected at examination centers in local community health centers in the participants' residential areas. Participants were asked to complete a questionnaire, provide a fasting blood sample, and undergo physical examinations. A total of 19,703 respondents were excluded because of failure to fulfil one or all of these requirements. Finally, 121,981 participants (86.09%) were included in the final data analysis.

## 2.2 Questionnaire survey

Prior to the study, all investigators completed a training course to understand the methodology and process of the study. Working manuals containing questionnaire techniques, blood pressure measurement, anthropometric measurements, biological sample collection, and processing information were distributed to all the investigators.

Data were recorded by face-to-face interview 1 hour after blood collection. All participants completed a standardized questionnaire including questions on sociodemographic status (e.g., date of birth, sex, education level, marital status), past medical history (e.g., history of previous disease, operation history, history of trauma), family health history (e.g., hypertension, diabetes, coronary heart disease, malignant tumor, stroke), lifestyle (e.g., smoking, physical activity, alcohol consumption), and medication use, under the supervision of trained general practitioners and nurses. Educational level was categorized into three groups according to the number of years of education: illiterate, no education; primary education, 1–6 years of education; and junior high school education and above, seven or more years of education. Regarding drinking habits, participants were classified as habitual drinkers (drink at least once a day), non-habitual drinkers (six times a week to once a month), or non-drinker (almost never).<sup>14</sup> Based on a previous study, we divided participants into current smokers, ex-smokers, and never-smokers.<sup>15</sup>

## 2.3 Physical examination

Anthropometric examinations were carried out in the morning after overnight fasting, and body measurements were taken by trained examiners based on a standardized protocol. The physical examination methods were described as previous study.<sup>12</sup> Height and weight were measured with the participants wearing light clothing without shoes, using analogue scales. Waist circumference (WC) was measured at the end of normal expiration at the midpoint level of the mid-axillary line between the 12th rib head and the superior anterior iliac spine. Body mass index (BMI) was calculated by dividing body weight (in kilograms) by height squared (in meters). Blood pressure were measured in both arms and recorded the higher one. Calibrated electronic sphygmomanometers were used to measure blood pressure on the arm supported at heart level with sitting position, carried out twice. The average of the two measurements was used for the statistical analysis. To obtain accurate readings, the participants were asked to rest for at least 5 min before the measurement, or, if having engaged in excessive exercise prior to the visit, for at least 30 min before the measurement.

## 2.4 Blood sample collection and biochemical analyses

Venous blood samples were taken after overnight fasting for at least 8 hours. All blood samples were analyzed in clinical laboratories at the grade 2 hospitals to which the community health centers were directly affiliated. All the laboratories had successfully completed a standardization and competency program. Fasting venous blood was used to measure levels of Hb, plasma glucose, creatinine, total cholesterol (TC), triglycerides (TG), low-density lipoprotein cholesterol (LDL-C), and high-density lipoprotein cholesterol (HDL-C) using an automatic biochemistry analyzer. Biochemical analysis of fresh blood samples was completed within 4 hours.



1  
2  
3  
4  
5  
6  
7  
8  
9  
10  
11  
12  
13  
14  
15  
16  
17  
18  
19  
20  
21  
22  
23  
24  
25  
26  
27  
28  
29  
30  
31  
32  
33  
34  
35  
36  
37  
38  
39  
40  
41  
42  
43  
44  
45  
46  
47  
48  
49  
50  
51  
52  
53  
54  
55  
56  
57  
58  
59  
60

1 Serum creatinine was used to calculate the estimated glomerular filtration rate (eGFR)  
2 using the full age spectrum equation.<sup>16</sup>

### 3 **2.5 Definitions**

4 Anemia was defined as a Hb concentration < 13 g/dL in men and < 12 g/dL in  
5 women, according to World Health Organization standards.<sup>17</sup> Chronic kidney disease  
6 (CKD) was defined as eGFR < 60 mL/min/1.73 m<sup>2</sup>.<sup>18</sup> A diagnosis of hypertension  
7 was considered when three consecutive high readings ( $\geq 140$  systolic and/or  $\geq 90$   
8 mm Hg diastolic) with 2-week intervals were registered or treatment with  
9 antihypertensive medication within the previous 2 weeks was self-reported.<sup>19, 20</sup>  
10 Participants who met one of the following three criteria were diagnosed with diabetes:  
11 (1) previously diagnosed by professional doctors, (2) fasting plasma glucose (FBG)  $\geq$   
12 7.0 mmol/L, and (3) 2-hour plasma glucose level  $\geq 11.1$  mmol/L.<sup>21</sup> High TC, high TG,  
13 high LDL-C, and low HDL-C were diagnosed according to the 2016 Chinese  
14 Guidelines for the Management of Dyslipidemia in Adults.<sup>22</sup> In this study, we defined  
15 dyslipidemia as an abnormal concentration of one or more lipid components or the  
16 use of anti-dyslipidemia medications in the past 2 weeks.

17 Participants were divided into four groups based on the adult weight criteria  
18 published by the Ministry of Health of China (WS/T 428-2013): BMI < 18.5 kg/m<sup>2</sup>  
19 (low weight), BMI  $\geq 18.5$  kg/m<sup>2</sup> and < 24.0 kg/m<sup>2</sup> (normal weight), BMI  $\geq 24.0$  kg/m<sup>2</sup>  
20 and < 28.0 kg/m<sup>2</sup> (overweight), and BMI  $\geq 28.0$  kg/m<sup>2</sup> (obesity). A WC  $\geq 90$  cm for  
21 men and  $\geq 85$  cm for women was defined as central obesity.

### 22 **2.6 Statistical analyses**

23 Descriptive statistics, including means and standard deviations, were used to  
24 compute continuous variables. Numerical data were expressed as percentages and  
25 compared by  $\chi^2$  tests. Multivariate logistic regression analysis was performed to  
26 explore the association between prevalence of anemia and associated risk factors. In  
27 the multivariate logistic regression model, the prevalence of anemia was defined as  
28 the dependent variable, and gender, education level, age group, smoking status,  
29 drinking habit, BMI, central obesity, diabetes, hypertension, dyslipidemia and CKD  
30 were defined as the independent variables. Data analysis was carried out using SAS  
31 9.4 (Institute, Cary, NC, USA). A two-sided value of  $P < 0.05$  was considered to be  
32 statistically significant.

### 33 **2.7 Participants and public involvement**

34 Neither the study participants nor the public were involved in the design,  
35 recruitment or conduct of the study. All the participants had the option of receiving a  
36 health check and biochemical results when they visited the local community health  
37 centers.

### 38 **2.8 Ethical Approval Statement**

39 The study received ethnicity approval from the Center for Chronic Disease  
40 Control in Shenzhen (Grant No: SZCCC-201802, SZCCC-2020-018-01-PJ). The study  
41 complies with the guidelines of the Declaration of Helsinki. Written informed consent  
42 was received by all participants before the collection of data and conducting of the  
43 research. Where participants were illiterate, we obtained written informed consent  
44 from their proxies.

### 3. Results

#### 3.1 Characteristics of participants

The characteristics of the study participants are shown in Table 1. The mean age was  $71.28 \pm 5.58$  years (range 65–103 years). There were 54,649 men and 69,358 women, and > 50% of participants had a minimum of a junior school education. Among the study population, 8.22% were current smokers and 6.35% were habitual drinkers. The mean Hb, BMI, SBP, DBP, WC, FBG, TC, TG, LDL-C, HDL-C, and eGFR values among all 121,981 participants were  $13.64 \pm 1.67$  g/dL,  $23.83 \pm 3.17$  kg/m<sup>2</sup>,  $134.71 \pm 17.69$  mmHg,  $77.23 \pm 10.31$  mmHg,  $85.10 \pm 8.82$  cm,  $5.96 \pm 1.90$  mmol/L,  $5.21 \pm 2.00$  mmol/L,  $1.57 \pm 1.14$  mmol/L,  $3.09 \pm 1.05$  mmol/L,  $1.39 \pm 1.05$  mmol/L, and  $68.74 \pm 16.70$  mL/min/1.73m<sup>2</sup>, respectively. A total of 100,762 participants (82.60%) had at least one chronic disease, with hypertension (55.61%), dyslipidemia (44.73%), CKD (31.09%), and diabetes (22.31%) being the most prevalent (data not shown).

#### 3.2 Prevalence of anemia in different subgroups

The overall prevalence anemia was 15.43%. The prevalence of anemia among subpopulations is shown in Table 2. Anemia was significantly more prevalent in women than in men and generally increased with age. The prevalence was lower among individuals with at least primary-level education, and lower in current smokers and habitual drinkers compared with their counterparts. The prevalence of anemia was higher in participants with low weight and lower in those with overweight, obesity, central obesity, hypertension, or dyslipidemia. Individuals with diabetes or CKD had a higher prevalence of anemia than those without these conditions.

#### 3.3 Association between anemia and related variables

Binary logistic regression analysis was carried out with presence or absence of anemia as the dependent variable, and factors in univariate analysis as independent variables to determine the factors influencing anemia. Higher education level, current-smoker, drinker, overweight, obesity, central obesity, hypertension, and dyslipidemia were independently associated with lower odds for the presence of anemia (Fig. 1), while older age, underweight, diabetes, and CKD were independently associated with greater odds (Fig. 1). However, there was no significant difference in the risk of anemia in relation to sex.

### 4. Discussion

In this study, the prevalence of anemia among elderly individuals in an urban district in China was 15.43%. This was higher than the 12.86% reported in previous national studies in China,<sup>11</sup> but lower than the 18.90% prevalence reported in the 2009 national survey in China.<sup>23</sup> The difference in prevalence rates among these studies may have been caused by differences in study design, sample size, and/or the age of the study participants.

The current study found a significant negative correlation between anemia prevalence and educational level. This was consistent with studies conducted in Nepal

1 and Pakistan, which confirmed that a low educational level was a risk factor for  
2 anemia.<sup>24</sup> This relationship probably occurs because higher levels of education enable  
3 people to earn more and thus escape from the poverty trap. Multivariate analysis also  
4 identified older age as an independent risk factor for anemia, consistent with the  
5 findings of other related studies.<sup>9, 25</sup> The prevalence of anemia increased with age,  
6 with a two-to-three-fold increase (26.89% vs. 12.72%) in people aged > 80 years,  
7 suggesting the need for routine screening for anemia in this high-risk subgroup.

8 Current smokers had a lower risk of anemia than never smokers, and habitual  
9 drinking was also associated with a decreased risk of anemia (odds ratio: 0.81).  
10 However, these findings were not consistent with an Indian study.<sup>26</sup> Considering the  
11 potential risks to human health from alcohol or tobacco use, we do not recommend  
12 that alcohol or tobacco should be used as protective factors against anemia.

13 We also found a negative association between increased BMI and anemia  
14 prevalence, in accord with other studies conducted in China, the United States, Nepal,  
15 and Pakistan.<sup>24, 27</sup> The reasons for being underweight may include poor distribution of  
16 inadequate food within the family, food insecurity, poverty, and micronutrient  
17 deficiencies, which tend to coexist with other macronutrient deficiencies. The  
18 underlying mechanism accounting for the significant negative association between  
19 overweight or obesity and anemia risk is unclear; however there are several possible  
20 explanations. First, obese participants are less likely to be malnourished, because  
21 excess calorie intake leads to obesity,<sup>28</sup> and overnutrition in obese participants may  
22 thus be associated with a significant reduction in anemia risk. Second, obese  
23 participants may have a variety of other diseases that could increase Hb levels, such  
24 as obstructive sleep apnea and other obesity-related breathing disorders, which lead to  
25 chronic tissue hypoxia and increased red blood cells.<sup>29</sup>

26 We found that older people with diabetes had higher rates of anemia than  
27 non-diabetics, consistent with previous studies.<sup>30</sup> Evidence indicates that the  
28 incidence and prevalence of anemia in diabetic patients is often associated with  
29 erythropoietin deficiency caused by diabetic kidney damage.<sup>31</sup> Other researchers have  
30 also shown a link between anemia and hypertension, as shown in our current study.<sup>18</sup>

31 This study showed that the prevalence of anemia was low among individuals with  
32 dyslipidemia. A study by Zaribaf et al. found a significant positive correlation  
33 between Hb levels and dyslipidemia.<sup>32</sup> However, this study differed from our study in  
34 that it assessed the relationship between anemia and lipids in premenopausal women,  
35 whereas our study focused on older adults (aged 65–113 years).<sup>32</sup> In contrast, a study  
36 conducted by other researchers in women of childbearing age found no significant  
37 association between serum LDL and anemia.<sup>32</sup> The reasons for the different results in  
38 terms of the relationship between dyslipidemia and anemia deserve further  
39 investigation. Patients with CKD have defects in renal endocrine function, resulting in  
40 decreased erythropoietin secretion by the kidney, leading to nephrogenic anemia.<sup>33</sup>  
41 Nearly half of all patients with CKD have anemia.<sup>33</sup> The current study found the  
42 similar results.

43 This study had some limitations. First, it was a cross-sectional study and could only  
44 infer correlation, not causation. Second, we adopted a convenient sampling method to

1 recruit elderly participants. This is a major factor preventing true extrapolation of the  
2 results to the general population. Finally, renal disease was assessed based on a  
3 one-time GFR measurement, possibly leading to overestimation of the actual  
4 prevalence of CKD. However, these limitations do not affect the significance of the  
5 results, which provide the first evidence of the prevalence and risk factors of anemia  
6 among elderly individuals in urban China.

## 7 **5. Conclusion**

8 In conclusion, anemia is prevalent among the elderly population in China, with  
9 older age, underweight, diabetes, CKD, and anemia being positively associated with  
10 anemia, and higher education level, current-smoker, drinker, overweight, obesity,  
11 central obesity, hypertension, and dyslipidemia being negatively associated. The  
12 prevention, screening of key populations, and treatment of senile anemia should be a  
13 top priority in Shenzhen, and should be listed as important public health intervention  
14 measures for implementation.

## 18 **Acknowledgments**

19 We are grateful to all the volunteers for participating in the present study, and to  
20 all the investigators for their support and hard work during this survey.

## 22 **Author Contributions**

23 WN, XY, and JX: study conception and design. WN, XY, JZ, PL, HZ, YZ, and JX:  
24 performance of research. XY and JZ: data analysis and interpretation. WN and XY:  
25 writing the original draft. WN and JX: Writing the review and editing. All authors  
26 have read and agreed to the published version of the manuscript.

## 28 **Funding**

29 This study was supported by the Science and Technology Planning Project of  
30 Shenzhen City, Guangdong Province, China (Grant No. JCYJ20180703145202065);  
31 Shenzhen medical key discipline construction fund, and Sanming Project of Medicine  
32 in Shenzhen (Grant No. SZSM201811093).

## 34 **Conflicts of Interest**

35 The authors declare no conflict of interest.

## 37 **Patient consent for publication**

38 Not required.

## 40 **Ethics approval**

41 This study was approved by the ethical review committee of the Center for  
42 Chronic Disease Control of Shenzhen.

## Data sharing statement

All data generated or analysed during this study are included in this published article. No additional data are available.

## References

1. Working Group on "Expert Consensus on nutrition Prevention and Treatment of Iron deficiency Anemia" of Chinese Nutrition Society. Expert consensus on nutrition prevention and treatment of iron deficiency anemia. *Acta Nutrimenta Sinica* **2019**; 41,417-426.
2. Stevens GA, Finucane MM, De-Regil LM, *et al.* Global, regional, and national trends in haemoglobin concentration and prevalence of total and severe anaemia in children and pregnant and non-pregnant women for 1995-2011: a systematic analysis of population-representative data. *Lancet Glob Health* **2013**; 1, e16-25.
3. Wu WC, Rathore SS, Wang Y, *et al.* Blood transfusion in elderly patients with acute myocardial infarction. *N Engl J Med* **2001**; 345, 1230-1236.
4. Groenveld HF, Januzzi JL, Damman K, *et al.* Anemia and mortality in heart failure patients a systematic review and meta-analysis. *J Am Coll Cardiol* **2008**, 52, 818-827.
5. Ezekowitz JA MF, Armstrong PW. Anemia is common in heart failure and is associated with poor outcomes: insights from a cohort of 12065 patients with new-onset heart failure. *Circulation* **2003**; 107, 223-225.
6. Penninx BW, Guralnik JM, Onder G, *et al.* Anemia and decline in physical performance among older persons. *Am J Med* **2003**; 115, 104-110.
7. Penninx BW, Pahor M, Cesari M, *et al.* Anemia is associated with disability and decreased physical performance and muscle strength in the elderly. *J Am Geriatrics Soc* **2004**; 52, 719-724.
8. Cesari M, Penninx BW, Lauretani F, *et al.* Hemoglobin levels and skeletal muscle: results from the InCHIANTI study. *J Gerontol A Biol Sci Med Sci* **2004**;59(3):249-254.
9. Bianchi VE. Role of nutrition on anemia in elderly. *Clin Nutr ESPEN* **2016**; 11, e1-e11.
10. Ruan Y, Guo Y, Kowal P, *et al.* Association between anemia and frailty in 13,175 community-dwelling adults aged 50 years and older in China. *BMC Geriatr* **2019**; 19, 327.
11. Qin T, Yan M, Fu Z, *et al.* Association between anemia and cognitive decline among Chinese middle-aged and elderly: evidence from the China health and retirement longitudinal study. *BMC Geriatr* **2019**; 19, 305.
12. Ni W, Weng R, Yuan X, *et al.* Clustering of cardiovascular disease biological risk factors among older adults in Shenzhen City, China: a cross-sectional study. *BMJ Open* **2019**; 9, e024336.
13. Zhang Q, Qin G, Liu Z, *et al.* Dietary Balance Index-07 and the Risk of

- 1  
2  
3  
4  
5  
6  
7  
8  
9  
10  
11  
12  
13  
14  
15  
16  
17  
18  
19  
20  
21  
22  
23  
24  
25  
26  
27  
28  
29  
30  
31  
32  
33  
34  
35  
36  
37  
38  
39  
40  
41  
42  
43  
44  
45  
46  
47  
48  
49  
50  
51  
52  
53  
54  
55  
56  
57  
58  
59  
60
- 1 Anemia in Middle Aged and Elderly People in Southwest China: A Cross  
2 Sectional Study. *Nutrients* **2018**; 10, 162.
- 3 14. Zhang L, Wang F, Wang L, *et al.* Prevalence of chronic kidney disease in  
4 China: a cross-sectional survey. *Lancet* **2012**; 379, 815-822.
- 5 15. Zhang M, Liu S, Yang L, *et al.* Prevalence of smoking and knowledge about  
6 the smoking hazards among 170,000 Chinese adults: a nationally  
7 representative survey in 2013-2014. *Nicotine Tob Res* **2019**; 21, 1644-1651.
- 8 16. Pottel H, Hoste L, Dubourg L, Ebert N, *et al.* An estimated glomerular  
9 filtration rate equation for the full age spectrum. *Nephrol Dial Transplant*  
10 **2016**; 31,798-806.
- 11 17. World Health Organization. Haemoglobin Concentrations for the Diagnosis of  
12 Anaemia and Assessment of Severity.  
13 [https://apps.who.int/iris/bitstream/handle/10665/85839/WHO\\_NMH\\_NHD\\_M](https://apps.who.int/iris/bitstream/handle/10665/85839/WHO_NMH_NHD_M)  
14 [NM\\_11.1\\_eng.pdf?ua=1](https://apps.who.int/iris/bitstream/handle/10665/85839/WHO_NMH_NHD_M). Accessed July 21 **2021**.
- 15 18. Lee YG, Chang Y, Kang J, *et al.* Risk factors for incident anemia of chronic  
16 diseases: A cohort study. *PLoS One* **2019**; 14, e0216062.
- 17 19. Writing Group of 2018 Chinese Guidelines for the Management of  
18 Hypertension, Chinese Hypertension League, Chinese Society of Cardiology,  
19 Chinese Medical Doctor Association Hypertension Committee, Hypertension  
20 Branch of China International Exchange and Promotive Association for  
21 Medical and Health Care, Hypertension Branch of Chinese Geriatric  
22 Medical Association. 2018 Chinese guidelines for the management of  
23 hypertension. *Chin J Cardiovasc Med* **2019**; 24, 24-56.
- 24 20. Qaseem A, Wilt TJ, Rich R, *et al.* Pharmacologic Treatment of Hypertension  
25 in Adults Aged 60 Years or Older to Higher Versus Lower Blood Pressure  
26 Targets: A Clinical Practice Guideline From the American College of  
27 Physicians and the American Academy of Family Physicians. *Ann Intern Med*  
28 **2017**; 166, 430-437.
- 29 21. Wang Q, Zhang X, Fang L, *et al.* Prevalence, awareness, treatment and control  
30 of diabetes mellitus among middle-aged and elderly people in a rural Chinese  
31 population: A cross-sectional study. *PLoS One* **2018**; 13, e0198343.
- 32 22. Joint committee for guideline revision. 2016 Chinese guidelines for the  
33 management of dyslipidemia in adults. *J Geriatr Cardiol* **2018**; 15, 1-29.
- 34 23. Xu X, Hall J, Byles J, *et al.* Dietary pattern, serum magnesium, ferritin,  
35 C-reactive protein and anaemia among older people. *Clin Nutr* **2017**; 36,  
36 444-451.
- 37 24. Harding KL, Aguayo VM, Namirembe G, *et al.* Determinants of anemia  
38 among women and children in Nepal and Pakistan: An analysis of recent  
39 national survey data. *Matern Child Nutr* **2018**; Suppl 4, e12478.
- 40 25. Fiseha T, Adamu A, Tesfaye M, *et al.* Prevalence of anemia in diabetic adult  
41 outpatients in Northeast Ethiopia. *PLoS One* **2019**; 14, e0222111.
- 42 26. Didzun O, De Neve JW, Awasthi A, *et al.* Anaemia among men in India: a  
43 nationally representative cross-sectional study. *Lancet Glob Health* **2019**; 7,  
44 e1685-e1694.

1  
2  
3  
4  
5  
6  
7  
8  
9  
10  
11  
12  
13  
14  
15  
16  
17  
18  
19  
20  
21  
22  
23  
24  
25  
26  
27  
28  
29  
30  
31  
32  
33  
34  
35  
36  
37  
38  
39  
40  
41  
42  
43  
44  
45  
46  
47  
48  
49  
50  
51  
52  
53  
54  
55  
56  
57  
58  
59  
60

- 1 27. Qin Y, Melse-Boonstra A, Pan X, *et al.* Anemia in relation to body mass index  
2 and waist circumference among Chinese women. *Nutr J* **2013**. doi:  
3 10.1186/1475-2891-1112-1110.
- 4 28. Dandona P, Aljada A, Chaudhuri A, *et al.* Metabolic syndrome: a  
5 comprehensive perspective based on interactions between obesity, diabetes,  
6 and inflammation. *Circulation* **2005**;111,1448-1454.
- 7 29. Schwartz AR, Patil SP, Laffan AM, *et al.* Obesity and obstructive sleep apnea:  
8 pathogenic mechanisms and therapeutic approaches. *Proc Am Thorac Soc*  
9 **2008**; 5, 185-192.
- 10 30. Gauci R, Hunter M, Bruce DG, *et al.* Anemia complicating type 2 diabetes:  
11 Prevalence, risk factors and prognosis. *J Diabetes Complications* **2017**; 31,  
12 1169-1174.
- 13 31. Thomas MC. The High Prevalence of Anemia in Diabetes Is Linked to  
14 Functional Erythropoietin Deficiency. *Semin Nephrol* **2006**; 26, 275-282.
- 15 32. Zaribaf F, Entezari MH, Hassanzadeh A, *et al.* Association between dietary  
16 iron, iron stores, and serum lipid profile in reproductive age women. *J Educ*  
17 *Health Promot* **2014**; 3: DOI: 10.4103/2277-9531.127586.
- 18 33. Ryu SR, Park SK, Jung JY, *et al.* The Prevalence and Management of Anemia  
19 in Chronic Kidney Disease Patients: Result from the KoreaN Cohort Study for  
20 Outcomes in Patients With Chronic Kidney Disease (KNOW-CKD). *J Korean*  
21 *Med Sci* **2017**; 32, 249-256.

1  
2  
3  
4 **1 Tables**

5  
6 **2 Table 1** Sociodemographic and other characteristics of older adults living in  
7 Shenzhen community ( $N=121981$ )  
8

| Characteristics                   | General         |
|-----------------------------------|-----------------|
| Age (years)                       | 71.28 ± 5.58    |
| Hb(g/dL)                          | 13.64 ± 1.67    |
| BMI (Kg/m <sup>2</sup> )          | 23.83 ± 3.17    |
| SBP (mm Hg)                       | 134.71 ± 17.69  |
| DBP (mm Hg)                       | 77.23 ± 10.31   |
| WC (cm)                           | 85.1 ± 8.82     |
| FBG (mmol/L)                      | 5.96 ± 1.9      |
| TC(mmol/L)                        | 5.21 ± 2        |
| TG(mmol/L)                        | 1.57 ± 1.14     |
| LDL-C(mmol/L)                     | 3.09 ± 1.05     |
| HDL-C(mmol/L)                     | 1.39 ± 0.51     |
| eGFR                              | 68.74 ± 16.7    |
| Gender, n(%)                      |                 |
| Male                              | 54649 (44.07%)  |
| Female                            | 69358 (55.93%)  |
| Education level, n(%)             |                 |
| Illiterate                        | 9888 (8.11%)    |
| Primary education                 | 43441 (35.61%)  |
| Junior school education and above | 68652 (56.28%)  |
| Smoking status, n (%)             |                 |
| Current smoker                    | 10023 (8.22%)   |
| Ex-smoker                         | 7546 (6.19%)    |
| Never-smoker                      | 104412 (85.6%)  |
| Drinking habit, n (%)             |                 |
| Non-drinker                       | 101661 (83.34%) |
| Non-habitual drinker              | 12571 (10.31%)  |
| Habitual drinker                  | 7749 (6.35%)    |

9  
10  
11  
12  
13  
14  
15  
16  
17  
18  
19  
20  
21  
22  
23  
24  
25  
26  
27  
28  
29  
30  
31  
32  
33  
34  
35  
36  
37  
38  
39  
40  
41  
42  
43  
44  
45  
46  
47  
48  
49  
50  
51  
52  
53  
54  
55  
56  
57  
58  
59  
60



1  
2  
3 **Table 2** Prevalence of anemia in older adults living in Shenzhen community,  
4 according to sociodemographic and other characteristics  
5

| Characteristics                   | Total  | N     | %     | $\chi^2$ Value | <i>P</i> Value |
|-----------------------------------|--------|-------|-------|----------------|----------------|
| Total                             | 121981 | 18820 | 15.43 |                |                |
| Gender                            |        |       |       | 22.36          | <0.001         |
| Male                              | 53743  | 7946  | 14.79 |                |                |
| Female                            | 68238  | 10874 | 15.94 |                |                |
| Education level                   |        |       |       | 263.21         | <0.001         |
| Illiterate                        | 9888   | 2027  | 20.50 |                |                |
| Primary education                 | 43441  | 7240  | 16.67 |                |                |
| Junior school education and above | 68652  | 9553  | 13.92 |                |                |
| Age group                         |        |       |       | 1201.99        | <0.001         |
| 65~                               | 60043  | 7635  | 12.72 |                |                |
| 70~                               | 32750  | 4730  | 14.44 |                |                |
| 75~                               | 16599  | 3070  | 18.50 |                |                |
| 80~                               | 12589  | 3385  | 26.89 |                |                |
| Smoking status                    |        |       |       | 68.89          | <0.001         |
| Current smoker                    | 10023  | 1253  | 12.50 |                |                |
| Ex-smoker                         | 7546   | 1047  | 13.87 |                |                |
| Never-smoker                      | 104412 | 16520 | 15.82 |                |                |
| Drinking habit                    |        |       |       | 130.24         | <0.001         |
| Non-drinker                       | 101661 | 16302 | 16.04 |                |                |
| Non-habitual drinker              | 12571  | 1589  | 12.64 |                |                |
| Habitual drinker                  | 7749   | 929   | 11.99 |                |                |
| BMI                               |        |       |       | 1522.11        | <0.001         |
| Low weight                        | 4496   | 1504  | 33.45 |                |                |
| Normal weight                     | 61532  | 11041 | 17.94 |                |                |
| Overweight                        | 44644  | 5175  | 11.59 |                |                |
| Obesity                           | 11309  | 1100  | 9.73  |                |                |
| Central obesity                   |        |       |       | 540.10         | <0.001         |
| Yes                               | 49051  | 5897  | 12.02 |                |                |
| No                                | 72930  | 12923 | 17.72 |                |                |
| Diabetes                          |        |       |       | 27.05          | <0.001         |
| Yes                               | 27220  | 4520  | 16.61 |                |                |
| No                                | 94761  | 14300 | 15.09 |                |                |
| Hypertension                      |        |       |       | 63.27          | <0.001         |
| Yes                               | 67835  | 9883  | 14.57 |                |                |
| No                                | 54146  | 8937  | 16.51 |                |                |
| Dyslipidemia                      |        |       |       | 211.72         | <0.001         |
| Yes                               | 54564  | 7354  | 13.48 |                |                |
| No                                | 67417  | 11466 | 17.01 |                |                |
| CKD                               |        |       |       | 624.34         | <0.001         |
| Yes                               | 37927  | 7574  | 19.97 |                |                |
| No                                | 84054  | 11246 | 13.38 |                |                |

1  
2  
3  
4 **1 Figure legends**

- 5  
6 2 Fig 1 Risk factors analyses on the prevalence of anemia in older adults living in  
7 3 Shenzhen community  
8  
9  
10  
11  
12  
13  
14  
15  
16  
17  
18  
19  
20  
21  
22  
23  
24  
25  
26  
27  
28  
29  
30  
31  
32  
33  
34  
35  
36  
37  
38  
39  
40  
41  
42  
43  
44  
45  
46  
47  
48  
49  
50  
51  
52  
53  
54  
55  
56  
57  
58  
59  
60

For peer review only

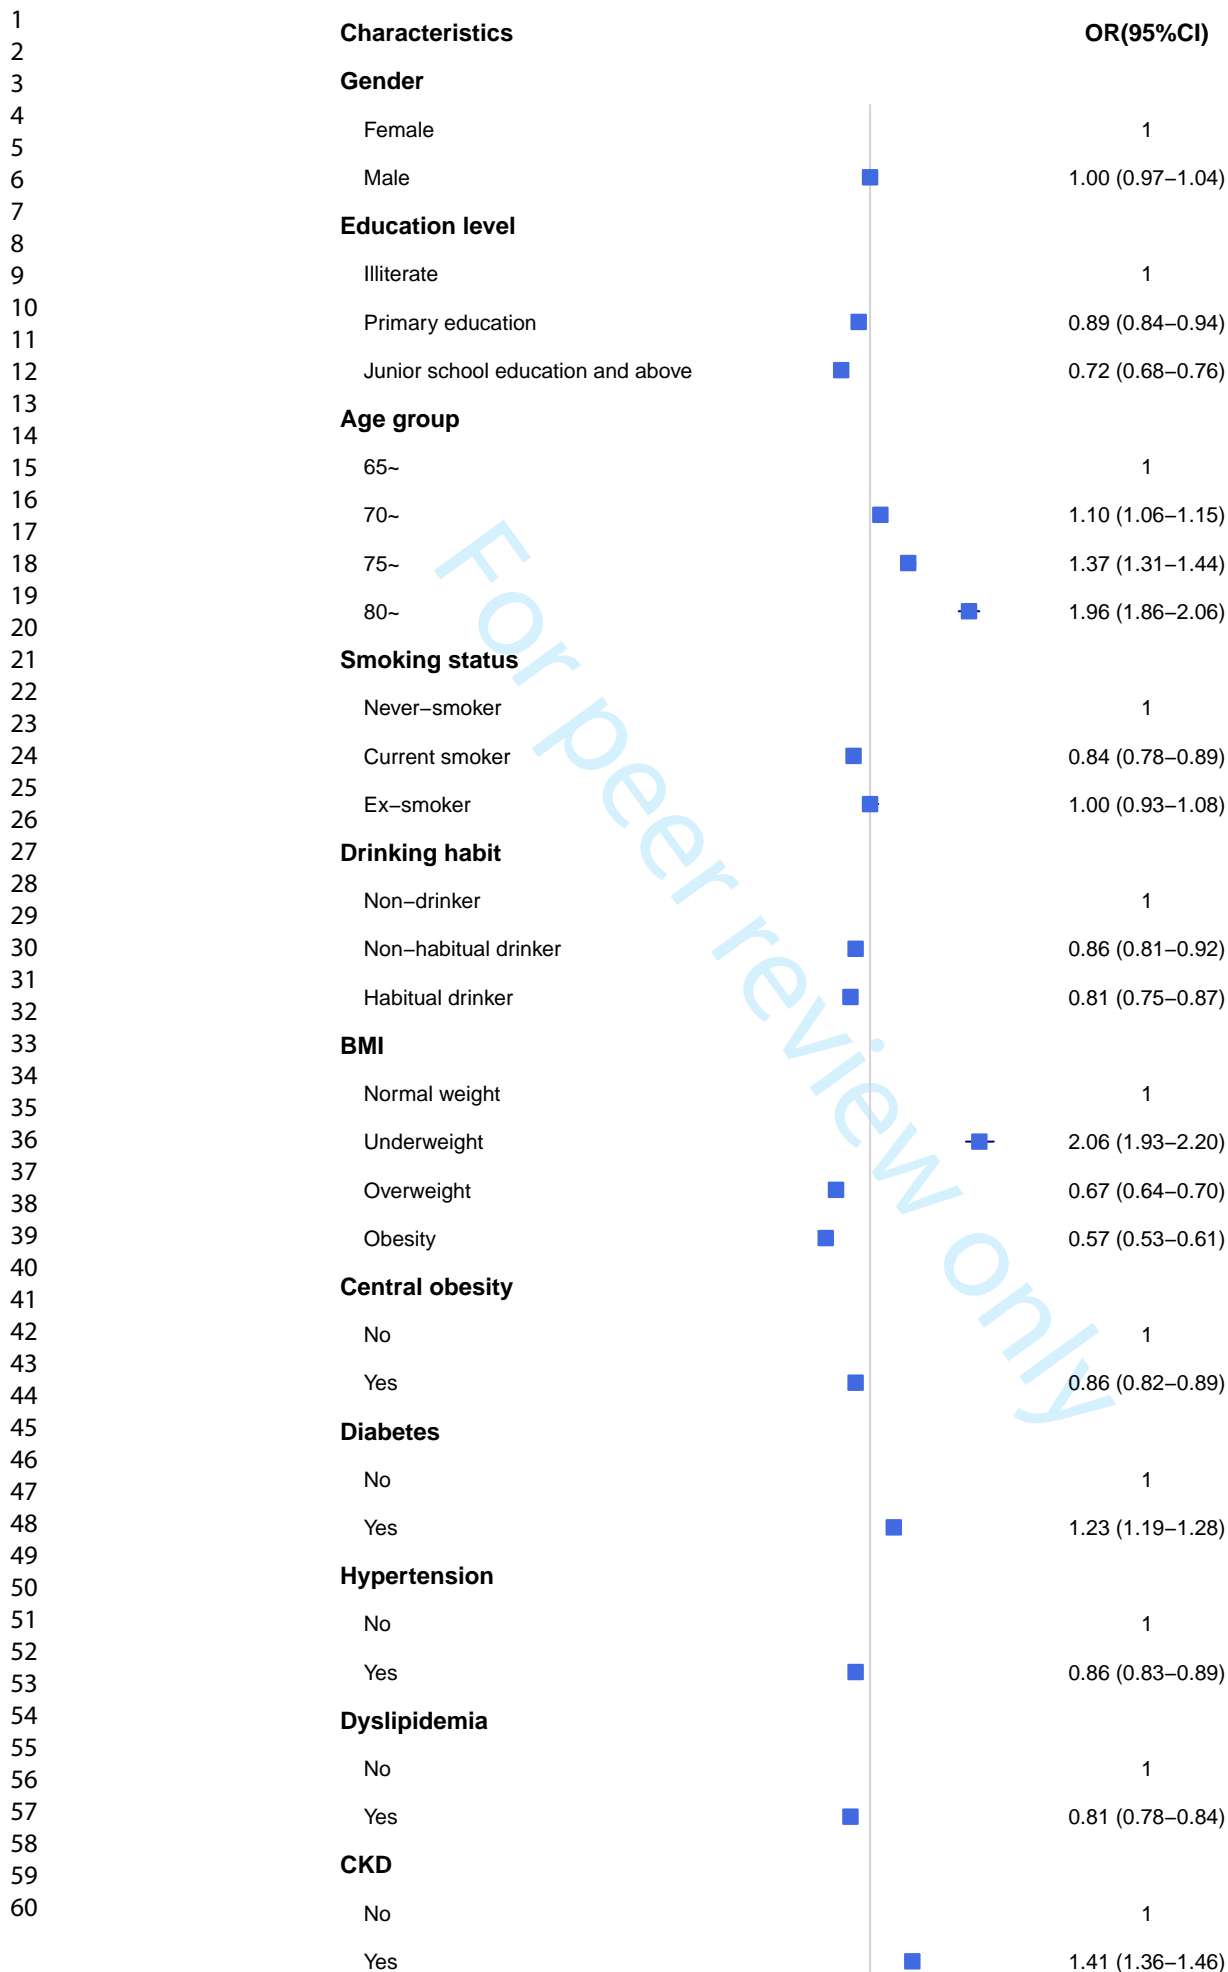

**STROBE 2007 (v4) Statement—Checklist of items that should be included in reports of *cross-sectional studies***

| Section/Topic                | Item # | Recommendation                                                                                                                                                                       | Reported on page # |
|------------------------------|--------|--------------------------------------------------------------------------------------------------------------------------------------------------------------------------------------|--------------------|
| <b>Title and abstract</b>    | 1      | (a) Indicate the study's design with a commonly used term in the title or the abstract                                                                                               | Page 1             |
|                              |        | (b) Provide in the abstract an informative and balanced summary of what was done and what was found                                                                                  | Page 2             |
| <b>Introduction</b>          |        |                                                                                                                                                                                      |                    |
| Background/rationale         | 2      | Explain the scientific background and rationale for the investigation being reported                                                                                                 | Page 4             |
| Objectives                   | 3      | State specific objectives, including any prespecified hypotheses                                                                                                                     | Page 4             |
| <b>Methods</b>               |        |                                                                                                                                                                                      |                    |
| Study design                 | 4      | Present key elements of study design early in the paper                                                                                                                              | Page 4             |
| Setting                      | 5      | Describe the setting, locations, and relevant dates, including periods of recruitment, exposure, follow-up, and data collection                                                      | Page 4             |
| Participants                 | 6      | (a) Give the eligibility criteria, and the sources and methods of selection of participants                                                                                          | Page 4             |
| Variables                    | 7      | Clearly define all outcomes, exposures, predictors, potential confounders, and effect modifiers. Give diagnostic criteria, if applicable                                             | Page 5-6           |
| Data sources/<br>measurement | 8*     | For each variable of interest, give sources of data and details of methods of assessment (measurement). Describe comparability of assessment methods if there is more than one group | Page 5-6           |
| Bias                         | 9      | Describe any efforts to address potential sources of bias                                                                                                                            | Page 6             |
| Study size                   | 10     | Explain how the study size was arrived at                                                                                                                                            | Page 4             |
| Quantitative variables       | 11     | Explain how quantitative variables were handled in the analyses. If applicable, describe which groupings were chosen and why                                                         | Not applicable     |
| Statistical methods          | 12     | (a) Describe all statistical methods, including those used to control for confounding                                                                                                | Page 6             |
|                              |        | (b) Describe any methods used to examine subgroups and interactions                                                                                                                  | Not applicable     |
|                              |        | (c) Explain how missing data were addressed                                                                                                                                          | Not applicable     |
|                              |        | (d) If applicable, describe analytical methods taking account of sampling strategy                                                                                                   | Not applicable     |
|                              |        | (e) Describe any sensitivity analyses                                                                                                                                                | Not applicable     |
| <b>Results</b>               |        |                                                                                                                                                                                      |                    |

|                          |     |                                                                                                                                                                                                              |                |
|--------------------------|-----|--------------------------------------------------------------------------------------------------------------------------------------------------------------------------------------------------------------|----------------|
| Participants             | 13* | (a) Report numbers of individuals at each stage of study—eg numbers potentially eligible, examined for eligibility, confirmed eligible, included in the study, completing follow-up, and analysed            | Page 4         |
|                          |     | (b) Give reasons for non-participation at each stage                                                                                                                                                         | Not applicable |
|                          |     | (c) Consider use of a flow diagram                                                                                                                                                                           | Not applicable |
| Descriptive data         | 14* | (a) Give characteristics of study participants (eg demographic, clinical, social) and information on exposures and potential confounders                                                                     | Page 7         |
|                          |     | (b) Indicate number of participants with missing data for each variable of interest                                                                                                                          | Not applicable |
| Outcome data             | 15* | Report numbers of outcome events or summary measures                                                                                                                                                         | Page 7         |
| Main results             | 16  | (a) Give unadjusted estimates and, if applicable, confounder-adjusted estimates and their precision (eg, 95% confidence interval). Make clear which confounders were adjusted for and why they were included | Page 7         |
|                          |     | (b) Report category boundaries when continuous variables were categorized                                                                                                                                    | Page 7         |
|                          |     | (c) If relevant, consider translating estimates of relative risk into absolute risk for a meaningful time period                                                                                             | Page 7         |
| Other analyses           | 17  | Report other analyses done—eg analyses of subgroups and interactions, and sensitivity analyses                                                                                                               | Not applicable |
| <b>Discussion</b>        |     |                                                                                                                                                                                                              |                |
| Key results              | 18  | Summarise key results with reference to study objectives                                                                                                                                                     | Page 7-8       |
| Limitations              | 19  | Discuss limitations of the study, taking into account sources of potential bias or imprecision. Discuss both direction and magnitude of any potential bias                                                   | Page 8-9       |
| Interpretation           | 20  | Give a cautious overall interpretation of results considering objectives, limitations, multiplicity of analyses, results from similar studies, and other relevant evidence                                   | Page 7-9       |
| Generalisability         | 21  | Discuss the generalisability (external validity) of the study results                                                                                                                                        | Page 9         |
| <b>Other information</b> |     |                                                                                                                                                                                                              |                |
| Funding                  | 22  | Give the source of funding and the role of the funders for the present study and, if applicable, for the original study on which the present article is based                                                | Page 9         |

\*Give information separately for cases and controls in case-control studies and, if applicable, for exposed and unexposed groups in cohort and cross-sectional studies.

**Note:** An Explanation and Elaboration article discusses each checklist item and gives methodological background and published examples of transparent reporting. The STROBE checklist is best used in conjunction with this article (freely available on the Web sites of PLoS Medicine at <http://www.plosmedicine.org/>, Annals of Internal Medicine at <http://www.annals.org/>, and Epidemiology at <http://www.epidem.com/>). Information on the STROBE Initiative is available at [www.strobe-statement.org](http://www.strobe-statement.org).

# BMJ Open

## Anemia and associated factors among older adults in an urban district in China: a large-scale cross-sectional study

|                                 |                                                                                                                                                                                                                                                                                                                                                                                                                                                                                                                                                                                                                                  |
|---------------------------------|----------------------------------------------------------------------------------------------------------------------------------------------------------------------------------------------------------------------------------------------------------------------------------------------------------------------------------------------------------------------------------------------------------------------------------------------------------------------------------------------------------------------------------------------------------------------------------------------------------------------------------|
| Journal:                        | <i>BMJ Open</i>                                                                                                                                                                                                                                                                                                                                                                                                                                                                                                                                                                                                                  |
| Manuscript ID                   | bmjopen-2021-056100.R1                                                                                                                                                                                                                                                                                                                                                                                                                                                                                                                                                                                                           |
| Article Type:                   | Original research                                                                                                                                                                                                                                                                                                                                                                                                                                                                                                                                                                                                                |
| Date Submitted by the Author:   | 02-Oct-2021                                                                                                                                                                                                                                                                                                                                                                                                                                                                                                                                                                                                                      |
| Complete List of Authors:       | Ni, Wenqing; Shenzhen Center for Chronic Disease Control, Department of Elderly Health Management<br>Yuan, Xueli; Shenzhen Center for Chronic Disease Control, Department of Elderly Health Management<br>Sun, Yuanying; Shenzhen Center for Chronic Disease Control, Department of Elderly Health Management<br>Zhang, Hong; Shenzhen Center for Chronic Disease Control, Department of Elderly Health Management<br>Zhang, Yan; Shenzhen Center for Chronic Disease Control, Department of Elderly Health Management<br>Xu, Jian; Shenzhen Nanshan Center for Chronic Disease Control, Department of Elderly Health Management |
| <b>Primary Subject Heading</b>: | Epidemiology                                                                                                                                                                                                                                                                                                                                                                                                                                                                                                                                                                                                                     |
| Secondary Subject Heading:      | Epidemiology, Public health                                                                                                                                                                                                                                                                                                                                                                                                                                                                                                                                                                                                      |
| Keywords:                       | Anaemia < HAEMATOLOGY, EPIDEMIOLOGY, Risk management < HEALTH SERVICES ADMINISTRATION & MANAGEMENT                                                                                                                                                                                                                                                                                                                                                                                                                                                                                                                               |
|                                 |                                                                                                                                                                                                                                                                                                                                                                                                                                                                                                                                                                                                                                  |

SCHOLARONE™  
Manuscripts



I, the Submitting Author has the right to grant and does grant on behalf of all authors of the Work (as defined in the below author licence), an exclusive licence and/or a non-exclusive licence for contributions from authors who are: i) UK Crown employees; ii) where BMJ has agreed a CC-BY licence shall apply, and/or iii) in accordance with the terms applicable for US Federal Government officers or employees acting as part of their official duties; on a worldwide, perpetual, irrevocable, royalty-free basis to BMJ Publishing Group Ltd ("BMJ") its licensees and where the relevant Journal is co-owned by BMJ to the co-owners of the Journal, to publish the Work in this journal and any other BMJ products and to exploit all rights, as set out in our [licence](#).

The Submitting Author accepts and understands that any supply made under these terms is made by BMJ to the Submitting Author unless you are acting as an employee on behalf of your employer or a postgraduate student of an affiliated institution which is paying any applicable article publishing charge ("APC") for Open Access articles. Where the Submitting Author wishes to make the Work available on an Open Access basis (and intends to pay the relevant APC), the terms of reuse of such Open Access shall be governed by a Creative Commons licence – details of these licences and which [Creative Commons](#) licence will apply to this Work are set out in our licence referred to above.

Other than as permitted in any relevant BMJ Author's Self Archiving Policies, I confirm this Work has not been accepted for publication elsewhere, is not being considered for publication elsewhere and does not duplicate material already published. I confirm all authors consent to publication of this Work and authorise the granting of this licence.

1  
2  
3  
4 1 **Anemia and associated factors among older adults in an urban**  
5  
6 2 **district in China: a large-scale cross-sectional study**  
7  
8  
9 3

10  
11 4 Wenqing Ni<sup>1#</sup>, Xueli Yuan<sup>1#</sup>, Yuanying Sun<sup>1</sup>, Hongmin Zhang<sup>1</sup>,  
12  
13  
14 5 Yan Zhang<sup>1</sup>, Jian Xu<sup>1</sup>  
15

16  
17 6 <sup>1</sup>Department of Elderly Health Management, Shenzhen Center for Chronic Disease  
18  
19 7 Control, Shenzhen, Guangdong, 518020, China

20  
21 8 # These authors contributed equally to this work.  
22

23  
24 9  
25 10 \*Corresponding author :

26 11 Jian Xu, Ph.D.

27 12 Shenzhen Center for Chronic Disease Control

28 13 No.2021, Buxin Rd. Shenzhen, Guangdong 518020, P.R. China  
29

30 14  
31 15 Tel: 86-755-25506942

32 16 Fax: 86-755-25506942

33 17 E-mail: [anniexu73@126.com](mailto:anniexu73@126.com)  
34  
35  
36  
37  
38  
39  
40  
41  
42  
43  
44  
45  
46  
47  
48  
49  
50  
51  
52  
53  
54  
55  
56  
57  
58  
59  
60



**Abstract**

**Objective:** Anemia leads to poor health outcomes in older adults; however, most current research in China has focused on younger adults. The present study aimed to investigate the prevalence of anemia and its associated factors in older adults in an urban district in China.

**Design:** A cross-sectional study.

**Setting:** A urbanized region, Shenzhen, China.

**Participants:** A total of 121,981 participants aged  $\geq 65$  years were recruited at local community health service centers in Shenzhen from January to December 2018.

**Primary outcomes:** The prevalence of anemia was analyzed and potential associated factors were evaluated.

**Results:** The mean Hemoglobin level was  $13.64 \pm 1.67$ g/dL and the prevalence of anemia was 15.43%. Prevalence of mild, moderate and severe anemia were 12.24%, 2.94% and 0.25% respectively. Anemia was positively associated with older age, being underweight (adjusted odds ratio (*AOR*): 2.06, 95% confidence interval (*CI*): 1.93–2.20), diabetes (*AOR*: 1.23, 95% *CI*: 1.19–1.28), and chronic kidney disease (*AOR*: 1.41, 95% *CI*: 1.36–1.46), and inversely with higher education level, current-smoker (*AOR*: 0.84, 95% *CI*: 0.78–0.89), non-habitual drinker (*AOR*: 0.86, 95% *CI*: 0.81–0.92), habitual drinker (*AOR*: 0.81, 95% *CI*: 0.75–0.87), overweight (*AOR*: 0.67, 95% *CI*: 0.64–0.70), obesity (*AOR*: 0.57, 95% *CI*: 0.53–0.61), central obesity (*AOR*: 0.86, 95% *CI*: 0.82–0.89), hypertension (*AOR*: 0.86, 95% *CI*: 0.83–0.89), and dyslipidemia (*AOR*: 0.81, 95% *CI*: 0.78–0.84).

**Conclusion:** Anemia is prevalent among people aged 65 years and older in China. Screening of high-risk populations, and treatment of senile anemia should be a top priority in Shenzhen, and should be listed as important public health intervention measures for implementation.

**Keywords:** older adults, anemia, epidemiologic study, risk factor

1  
2  
3  
4 1 **Strengths and limitations of this study**

5 2 ■ This was the first large-scale cross-sectional study to assess the prevalence of  
6 3 anemia and its factors in an urban district in China.

7 4 ■ This study had a sufficiently large sample size to detect significant differences in  
8 5 the prevalence of anemia among older adults.

9 6 ■ Convenience sampling was used to enroll the population sample.

10 7 ■ The dataset used in this study did not provide information on the dietary behavior  
11 8 of the participants.  
12  
13  
14  
15  
16  
17  
18  
19  
20  
21  
22  
23  
24  
25  
26  
27  
28  
29  
30  
31  
32  
33  
34  
35  
36  
37  
38  
39  
40  
41  
42  
43  
44  
45  
46  
47  
48  
49  
50  
51  
52  
53  
54  
55  
56  
57  
58  
59  
60

9  
10  
11  
12  
13  
14  
15  
16  
17  
18  
19  
20  
21  
22  
23  
24  
25  
26  
27  
28  
29  
30  
31  
32  
33  
34  
35  
36  
37  
38  
39  
40  
41  
42  
43  
44  
45  
46  
47  
48  
49  
50  
51  
52  
53  
54  
55  
56  
57  
58  
59  
60

For peer review only

## 1. Introduction

Anemia results from an inadequate number of erythrocytes which leads to a decreased ability to carry oxygen to meet the body's physiological demands. It is characterized by reduced levels of hemoglobin (Hb) in the blood in affected individuals. Anemia may occur at all stages of life, however, older people are among the most vulnerable.<sup>1,2</sup> Globally, 11.0% of men and 10.2% of women aged 65 years and older are anemic.<sup>3</sup> Anemia is a risk factor for a variety of adverse outcomes in the older population, including hospitalization, disability and mortality.<sup>1</sup> Previous studies found higher mortality rates in people aged 65 years and older hospitalized for myocardial infarction, patients with systolic and diastolic chronic heart failure (CHF), and in older CHF patients with anemia.<sup>4-6</sup> Anemia is also an independent risk factor for decline in physical performance and has a negative impact on quality of life, physical functioning, and muscle strength in older individuals.<sup>7-9</sup> Early identification and treatment of anemia is therefore an important strategy to improve the quality of life of older adults with anemia.

In China, 13.5% of the total population (approximately 190.64 million people) were aged 65 years or older in 2020,<sup>10</sup> and increasing life expectancy and declining fertility rates mean that China is experiencing an ongoing aging process. In line with the aging of the population, anemia has become an important public health problem in China. The China Health and Retirement Longitudinal Study showed a prevalence of anemia in middle-aged and older Chinese residents of 12.86% from 2011 to 2012,<sup>11</sup> and the 2010–2012 China National Nutrition and Health Survey found a prevalence of anemia in older Chinese people of 12.6%.<sup>12</sup> Preventing anemia and improving the health of older adults in China are thus urgent issues. However, the only previous trial for preventing anemia examined the use of iron-fortified soy sauce in some cities in China, which aimed to reduce the prevalence of iron-deficiency anemia among women of reproductive age.<sup>13</sup> The prevention of anemia in older adults thus still presents a challenge, and limited measures have been taken to address this public health problem.

Identifying the factors affecting the occurrence of anemia would help to determine effective interventional targets. Economic development and living standards are important factors affecting anemia.<sup>14</sup> Most previous studies focused on the prevalence of anemia among middle-aged and older adults in urban and rural districts of China, but there is a lack of large-sample studies of anemia among older adults in urban districts.<sup>11,12,15,16</sup> This study therefore aimed to examine the prevalence of anemia and its related factors among people aged 65 or older in an urban district of China, to help develop strategies for future interventions and the prevention of anemia in older adults living in urban districts in China.

## 2. Materials and methods

### 2.1 Study population

We used convenience sampling to select our study population by recruiting people aged 65 years and older from the lists of all residents registered at local community

1 health centers in Shenzhen, China, from January 2018 to December 2018.  
2 Recruitment activities include pasting posters or placing leaflets in local community  
3 health centers and other public places. Electronic posters were also distributed via all  
4 the open WeChat groups of local community health center staff, to make the survey  
5 easily available to close contacts. The staff of the local community health centers also  
6 recruited older adults in their community to participate in the survey by  
7 telephone. The eligibility criteria were as follows: (1) lived in Shenzhen for more than  
8 6 months; (2) able to participate in the study and give informed consent; and (3)  
9 conscious and able to cooperate to complete the face-to-face interview, medical  
10 examinations and biomedical tests. We excluded residents living in prisons. A total of  
11 141,684 individuals were recruited in this study, accounting for 36.9%  
12 (141,684/383,700) of the resident older adult population in Shenzhen according to the  
13 2015 population census. Data were collected at examination centers in local  
14 community health centers in the participants' residential areas. Participants were  
15 asked to complete a questionnaire, provide a fasting blood sample, and undergo  
16 physical examinations. A total of 19,703 respondents were excluded because of  
17 failure to fulfil one or all of these requirements. Finally, 121,981 participants  
18 (86.09%) were included in the final data analysis.

## 19 **2.2 Questionnaire survey**

20 Prior to the study, all investigators completed a training course to understand the  
21 methodology and process of the study. Working manuals containing questionnaire  
22 techniques, blood pressure measurement, anthropometric measurements, biological  
23 sample collection, and processing information were distributed to all the investigators.

24 Data were recorded by face-to-face interview 1 hour after blood collection. All  
25 participants completed a standardized questionnaire including questions on  
26 sociodemographic status (e.g., date of birth, sex, education level, marital status), past  
27 medical history (e.g., history of previous disease, operation history, history of  
28 trauma), family health history (e.g., hypertension, diabetes, coronary heart disease,  
29 malignant tumor, stroke), lifestyle (e.g., smoking, physical activity, alcohol  
30 consumption), and medication use, under the supervision of trained general  
31 practitioners and nurses. Educational level was categorized into three groups  
32 according to the number of years of education: not educated; primary education (1–6  
33 years of education); and junior high school education and above ( $\geq 7$  years of education).  
34 Regarding drinking habits, participants were classified as habitual drinkers (drink at  
35 least once a day), non-habitual drinkers (six times a week to once a month), or  
36 non-drinker (almost never).<sup>17</sup> Based on a previous study, we divided participants into  
37 current smokers, ex-smokers, and never-smokers.<sup>18</sup>

## 38 **2.3 Physical examination**

39 Anthropometric examinations were carried out in the morning after overnight  
40 fasting, and body measurements were taken by trained examiners based on a  
41 standardized protocol. Height and weight were measured with the participants  
42 wearing light clothing without shoes, using analogue scales. Waist circumference  
43 (WC) was measured at the end of normal expiration at the midpoint level of the  
44 mid-axillary line between the 12th rib head and the superior anterior iliac spine. Body

1 mass index (BMI) was calculated by dividing body weight (in kilograms) by height  
2 squared (in meters). Blood pressure was measured twice in both arms supported at  
3 heart level with the participants in a sitting position, using a calibrated electronic  
4 sphygmomanometer and the higher level was recorded and used for statistical  
5 analysis. To obtain accurate readings, the participants were asked to rest for at least 5  
6 min before the measurement, or if they had engaged in excessive exercise prior to the  
7 visit, to rest for at least 30 min before the measurement.

#### 8 **2.4 Blood sample collection and biochemical analyses**

9 Venous blood samples were taken after overnight fasting for at least 8 hours. All  
10 blood samples were analyzed in clinical laboratories at the grade 2 hospitals to which  
11 the community health centers were directly affiliated. All the laboratories had  
12 successfully completed a standardization and competency program. Fasting venous  
13 blood was used to measure levels of Hb, plasma glucose, creatinine, total cholesterol  
14 (TC), triglycerides (TG), low-density lipoprotein cholesterol (LDL-C), and  
15 high-density lipoprotein cholesterol (HDL-C) using an automatic biochemistry  
16 analyzer. Biochemical analysis of fresh blood samples was completed within 4 hours.  
17 Serum creatinine was used to calculate the estimated glomerular filtration rate (eGFR)  
18 using the full age spectrum equation.<sup>19</sup>

#### 19 **2.5 Operational definitions/measurements**

20 Anemia was defined as a Hb concentration < 13 g/dL in men and < 12 g/dL in  
21 women, according to World Health Organization standards.<sup>20</sup> The severity of anemia  
22 was classified as mild (11–11.9 g/dL (women), 11–12.9 g/dL (men)), moderate (8–  
23 10.9 g/dL), and severe (<8 g/dL).<sup>20</sup> Chronic kidney disease (CKD) was defined as  
24 eGFR < 60 mL/min/1.73 m<sup>2</sup>.<sup>21</sup> A diagnosis of hypertension was considered in  
25 participants with three consecutive high readings ( $\geq 140$  systolic and/or  $\geq 90$  mm  
26 Hg diastolic) with 2-week intervals or treatment with antihypertensive medication  
27 within the previous 2 weeks was self-reported.<sup>22, 23</sup> Participants who met one of the  
28 following three criteria were diagnosed with diabetes: (1) previously diagnosed by  
29 professional doctors, (2) fasting plasma glucose (FBG)  $\geq 7.0$  mmol/L, and (3) 2-hour  
30 plasma glucose level  $\geq 11.1$  mmol/L.<sup>24</sup> High TC, high TG, high LDL-C, and low  
31 HDL-C were diagnosed according to the 2016 Chinese Guidelines for the  
32 Management of Dyslipidemia in Adults.<sup>25</sup> In this study, we defined dyslipidemia as an  
33 abnormal concentration of one or more lipid components or the use of  
34 anti-dyslipidemia medications in the past 2 weeks.

35 Participants were divided into four groups based on the adult weight criteria  
36 published by the Ministry of Health of China (WS/T 428-2013): BMI < 18.5 kg/m<sup>2</sup>  
37 (low weight), BMI  $\geq 18.5$  kg/m<sup>2</sup> and <24.0 kg/m<sup>2</sup> (normal weight), BMI  $\geq 24.0$  kg/m<sup>2</sup>  
38 and < 28.0 kg/m<sup>2</sup> (overweight), and BMI  $\geq 28.0$  kg/m<sup>2</sup> (obesity). A WC  $\geq 90$  cm for  
39 men and  $\geq 85$  cm for women was defined as central obesity.<sup>26</sup>

#### 40 **2.6 Statistical analyses**

41 Descriptive statistics, including means and standard deviations, were used to  
42 compute continuous variables. Numerical data were expressed as percentages and  
43 compared by  $\chi^2$  tests. Multivariate logistic regression analysis was performed to  
44 explore the associations between the prevalence of anemia and associated risk factors.

1 In the multivariate logistic regression model, the prevalence of anemia was defined as  
2 the dependent variable, and sex, education level, age group, smoking status, drinking  
3 habit, BMI, central obesity, diabetes, hypertension, dyslipidemia and CKD were  
4 defined as the independent variables. Data analysis was carried out using SAS 9.4  
5 (Institute, Cary, NC, USA). A two-sided value of  $P < 0.05$  was considered to be  
6 statistically significant.

### 7 **2.7 Participants and public involvement**

8 Neither the study participants nor the public were involved in the design,  
9 recruitment or conduct of the study. All the participants had the option of receiving a  
10 health check and biochemical results when they visited the local community health  
11 centers.

### 12 **2.8 Ethical Approval Statement**

13 The study received ethical approval from the Center for Chronic Disease Control  
14 in Shenzhen (Grant No: SZCCC-201802, SZCCC-2020-018-01-PJ). The study  
15 complied with the guidelines of the Declaration of Helsinki. Written informed consent  
16 was obtained from all participants before the collection of data and conducting of the  
17 research. If the participants were not educated, we obtained written informed consent  
18 from their proxies (son, daughter, daughter-in-law, son-in-law, etc).

## 19 **3. Results**

### 20 **3.1 Characteristics of participants**

21 The characteristics of the study participants are shown in Table 1. The mean age  
22 was  $71.28 \pm 5.58$  years (range 65–103 years). There were 54,649 men and 69,358  
23 women, and  $> 50\%$  of participants had a minimum of a junior school education.  
24 Among the study population, 8.22% were current smokers and 6.35% were habitual  
25 drinkers. The mean Hb, BMI, SBP, DBP, WC, FBG, TC, TG, LDL-C, HDL-C, and  
26 eGFR values among all 121,981 participants were  $13.64 \pm 1.67$  g/dL,  $23.83 \pm 3.17$   
27  $\text{kg/m}^2$ ,  $134.71 \pm 17.69$  mmHg,  $77.23 \pm 10.31$  mmHg,  $85.10 \pm 8.82$  cm,  $5.96 \pm 1.90$   
28 mmol/L,  $5.21 \pm 2.00$  mmol/L,  $1.57 \pm 1.14$  mmol/L,  $3.09 \pm 1.05$  mmol/L,  $1.39 \pm 1.05$   
29 mmol/L, and  $68.74 \pm 16.70$  mL/min/1.73m<sup>2</sup>, respectively. A total of 100,762  
30 participants (82.60%) had at least one chronic disease, with hypertension (55.61%),  
31 dyslipidemia (44.73%), CKD (31.09%), and diabetes (22.31%) being the most  
32 prevalent (data not shown).

### 33 **3.2 Prevalence of anemia in different subgroups**

34 The overall prevalence anemia was 15.43% and the prevalence (95% confidence  
35 intervals(CI)) of mild, moderate and severe anemia were 12.24% (12.05-12.42),  
36 2.94% (2.84-3.03) and 0.25% (0.23-0.28) respectively. The prevalence of anemia  
37 among subpopulations is shown in Table 2. Anemia was significantly more prevalent  
38 in women than in men and generally increased with age. The prevalence was lower  
39 among individuals with at least primary-level education, and lower in current smokers  
40 and habitual drinkers compared with their counterparts. The prevalence of anemia was  
41 higher in participants with low weight and lower in those with overweight, obesity,  
42 central obesity, hypertension, or dyslipidemia. Individuals with diabetes or CKD had a  
43 higher prevalence of anemia than those without these conditions.

### 3.3 Association between anemia and related variables

Binary logistic regression analysis was carried out with presence or absence of anemia as the dependent variable, and factors in univariate analysis as independent variables to determine the factors influencing anemia. Primary education (adjusted odds ratio (AOR)=0.89, 95%CI:0.84-0.94), junior school education and above (AOR=0.72, 95%CI:0.68-0.76) current-smoker (AOR=0.84, 95%CI:0.78-0.89), non-habitual drinker (AOR=0.86, 95%CI:0.81-0.92), habitual drinker (AOR=0.81, 95%CI:0.75-0.87), overweight (AOR=0.67, 95%CI:0.64-0.70), obesity (AOR=0.57, 95%CI:0.53-0.61), central obesity (AOR=0.86, 95%CI:0.82-0.89), hypertension (AOR=0.86, 95%CI:0.83-0.89), and dyslipidemia (AOR=0.81, 95%CI:0.78-0.84) were independently associated with lower odds for the presence of anemia (Fig. 1), while age 70-74 years (AOR=1.10, 95%CI:1.06-1.15), age 75-79 years (AOR=1.37, 95%CI:1.31-1.44), age  $\geq$  80 years (AOR=1.96, 95%CI:1.86-2.06), underweight (AOR=2.06, 95%CI:1.93-2.20), diabetes (AOR=1.23, 95%CI:1.19-1.28), and CKD (AOR=1.41, 95%CI:1.36-1.46) were independently associated with greater odds (Fig. 1). However, there was no significant difference in the risk of anemia in relation to sex.

## 4. Discussion

This was the first large-scale cross-sectional survey to report the prevalence of anemia in older adults (aged 65 years or older) living in an urban district of China. This study demonstrated that the prevalence of anemia was relatively high, representing a public health problem in Shenzhen. After controlling for the confounding factors we found that the prevalence of anemia varied with education level, age group, smoking status, drinking habit, BMI, central obesity, and some non-communicable diseases. The prevalence of anemia among older adults in an urban district in China in current study was 15.43%, which was higher than the 12.86% reported in previous national studies in China,<sup>11</sup> but lower than the 18.90% reported in the 2009 national survey in China.<sup>13</sup> The difference in prevalence rates among these studies may have been caused by differences in study design, sample size, and/or the age of the study participants.

The current study found a significant negative correlation between anemia prevalence and educational level. This was consistent with studies conducted in Nepal and Pakistan, which confirmed that a low educational level was a risk factor for anemia.<sup>27</sup> This relationship probably occurs because higher levels of education enable people to earn more and thus escape from the poverty trap. Multivariate analysis also identified older age as an independent risk factor for anemia, consistent with the findings of other related studies.<sup>3, 28</sup> The prevalence of anemia increased with age, with a two-to-three-fold increase (26.89% vs. 12.72%) in people aged > 80 years, suggesting the need for routine screening for anemia in this high-risk subgroup.

Current smokers had a lower risk of anemia than never smokers. Similarly, previous studies showed that smoking was negatively correlated with the risk of anemia.<sup>29,30</sup> A multiple logistic regression analysis of the health check-up database of

1 St. Luke's International Hospital in Tokyo between April 2016 and March 2017  
2 revealed that Japanese women (35–49 years) who were current smokers had a 25%  
3 lower risk of anemia compared with non-smokers, after adjusting for the covariates.<sup>30</sup>  
4 Increased Hb levels in smokers were associated with elevated carboxyhemoglobin  
5 (HbCO), a stable complex of Hb and carbon monoxide (CO), because of the exposure  
6 to excess CO caused by smoking.<sup>31</sup> The form of HbCO decreases oxygen delivery,  
7 and smokers had compensatory elevated Hb to increase erythropoiesis and maintain  
8 oxygen transportation.<sup>32</sup> This might explain why adaptation to excess CO during  
9 smoking was reflected by increases in Hb and RBC mass.<sup>33</sup> Habitual drinking was  
10 also associated with a decreased risk of anemia, with a corresponding OR of 0.81,  
11 consistent with a Korean study.<sup>29</sup> However, the direct causality of this negative  
12 correlation between alcohol drinking and anemia is still unclear.<sup>29</sup> Given the potential  
13 risks of alcohol and tobacco consumption to human health, we do not recommend  
14 increasing alcohol consumption or smoking to protect against anemia.

15 We also found a negative association between increased BMI and anemia  
16 prevalence, in accord with other studies conducted in China, the United States, Nepal,  
17 and Pakistan.<sup>27, 34</sup> The reasons for being underweight may include poor distribution of  
18 inadequate food within the family, food insecurity, poverty, and micronutrient  
19 deficiencies, which tend to coexist with other macronutrient deficiencies. The  
20 underlying mechanism accounting for the significant negative association between  
21 overweight or obesity and anemia risk is unclear; however there are several possible  
22 explanations. First, obese participants are less likely to be malnourished, because  
23 excess calorie intake leads to obesity,<sup>35</sup> and overnutrition in obese participants may  
24 thus be associated with a significant reduction in anemia risk. Second, obese  
25 participants may have a variety of other diseases that could increase Hb levels, such  
26 as obstructive sleep apnea and other obesity-related breathing disorders, which lead to  
27 chronic tissue hypoxia and increased red blood cells.<sup>36</sup>

28 We found that older people with diabetes had higher rates of anemia than  
29 non-diabetics, consistent with previous studies.<sup>37</sup> Evidence indicates that the  
30 incidence and prevalence of anemia in diabetic patients is often associated with  
31 erythropoietin deficiency caused by diabetic kidney damage.<sup>38</sup> Other researchers have  
32 also shown a link between anemia and hypertension, as shown in our current study.<sup>21</sup>

33 This study showed that the prevalence of anemia was low among individuals with  
34 dyslipidemia. A study by Zaribaf et al. found a significant positive correlation  
35 between Hb levels and dyslipidemia.<sup>39</sup> However, this study differed from our study in  
36 that it assessed the relationship between anemia and lipids in premenopausal women,  
37 whereas our study focused on older adults (aged 65–113 years).<sup>39</sup> In contrast, a study  
38 conducted by other researchers in women of childbearing age found no significant  
39 association between serum LDL and anemia.<sup>39</sup> The reasons for the different results in  
40 terms of the relationship between dyslipidemia and anemia deserve further  
41 investigation. Patients with CKD have defects in renal endocrine function, resulting in  
42 decreased erythropoietin secretion by the kidney, leading to nephrogenic anemia.<sup>40</sup>  
43 Nearly half of all patients with CKD have anemia.<sup>40</sup> The current study found the  
44 similar results.



1  
2  
3  
4  
5  
6  
7  
8  
9  
10  
11  
12  
13  
14  
15  
16  
17  
18  
19  
20  
21  
22  
23  
24  
25  
26  
27  
28  
29  
30  
31  
32  
33  
34  
35  
36  
37  
38  
39  
40  
41  
42  
43  
44  
45  
46  
47  
48  
49  
50  
51  
52  
53  
54  
55  
56  
57  
58  
59  
60

1 This study had some limitations. First, it was a cross-sectional study and could only  
2 infer correlation, not causation. Second, randomized sampling would represent the  
3 best design for testing the prevalence of anemia and its associated factors among older  
4 adults; however, large random sampling was not practically feasible and we therefore  
5 adopted a convenient sampling method to recruit older adult participants. This was a  
6 major factor preventing the extrapolation of the results to the general population.  
7 Finally, renal disease was assessed based on a one-time GFR measurement, possibly  
8 leading to overestimation of the actual prevalence of CKD. However, these  
9 limitations do not affect the significance of the results, which provide the first  
10 evidence of the prevalence and risk factors of anemia among older adults in urban  
11 China.

## 12 **5. Conclusion**

13 In conclusion, anemia is prevalent among the older adult population in China,  
14 with older age, underweight, diabetes, CKD, and anemia being positively associated  
15 with anemia, and higher education level, current-smoker, drinker, overweight,  
16 obesity, central obesity, hypertension, and dyslipidemia being negatively associated.  
17 Screening of high risk populations, and treatment of senile anemia should be top  
18 priorities in Shenzhen, and should be listed as important public health intervention  
19 measures for implementation.

## 23 **Acknowledgments**

24 We are grateful to all the volunteers for their participation in the present study,  
25 and to all the investigators for their support and hard work during this survey.

## 27 **Author Contributions**

28 WN, XY, and JX: study conception and design. WN, XY, YS, HZ, YZ, and JX:  
29 performance of research. XY and YS: data analysis and interpretation. WN and XY:  
30 writing the original draft. WN and JX: Writing the review and editing. All authors  
31 have read and agreed to the published version of the manuscript.

## 33 **Funding**

34 This study was supported by the Science and Technology Planning Project of  
35 Shenzhen City, Guangdong Province, China (Grant No. JCYJ20180703145202065),  
36 the Science and Technology Planning Project of Shenzhen City, Guangdong Province,  
37 China(Grant No. KCXFZ20201221173600001) Shenzhen medical key discipline  
38 construction fund, and Sanming Project of Medicine in Shenzhen (Grant No.  
39 SZSM201811093).

## 41 **Conflicts of Interest**

42 The authors declare no conflict of interest.

## 1 Patient consent for publication

2 Not required.

## 4 Ethics approval

5 This study was approved by the ethical review committee of the Center for  
6 Chronic Disease Control of Shenzhen.

## 8 Data sharing statement

9 All data generated or analyzed during this study are included in this published  
10 article. No additional data are available.

## 13 References

- 15 1. Working Group on "Expert Consensus on nutrition Prevention and Treatment  
16 of Iron deficiency Anemia" of Chinese Nutrition Society. Expert consensus on  
17 nutrition prevention and treatment of iron deficiency anemia. *Acta Nutrimenta*  
18 *Sinica* **2019**; 41,417-426.
- 19 2. Stevens GA, Finucane MM, De-Regil LM, *et al.* Global, regional, and national  
20 trends in haemoglobin concentration and prevalence of total and severe  
21 anaemia in children and pregnant and non-pregnant women for 1995-2011: a  
22 systematic analysis of population-representative data. *Lancet Glob Health*  
23 **2013**; 1, e16-25.
- 24 3. Bianchi VE. Role of nutrition on anemia in elderly. *Clin Nutr ESPEN* **2016**;  
25 11, e1-e11.
- 26 4. Wu WC, Rathore SS, Wang Y, *et al.* Blood transfusion in elderly patients with  
27 acute myocardial infarction. *N Engl J Med* **2001**; 345, 1230-1236.
- 28 5. Groenveld HF, Januzzi JL, Damman K, *et al.* Anemia and mortality in heart  
29 failure patients a systematic review and meta-analysis. *J Am Coll Cardiol*  
30 **2008**, 52, 818-827.
- 31 6. Ezekowitz JA MF, Armstrong PW. Anemia is common in heart failure and is  
32 associated with poor outcomes: insights from a cohort of 12065 patients with  
33 new-onset heart failure. *Circulation* **2003**; 107, 223-225.
- 34 7. Penninx BW, Guralnik JM, Onder G, *et al.* Anemia and decline in physical  
35 performance among older persons. *Am J Med* **2003**; 115, 104-110.
- 36 8. Penninx BW, Pahor M, Cesari M, *et al.* Anemia is associated with disability  
37 and decreased physical performance and muscle strength in the elderly. *J Am*  
38 *Geriatrics Soc* **2004**; 52, 719-724.
- 39 9. Cesari M, Penninx BW, Lauretani F, *et al.* Hemoglobin levels and skeletal  
40 muscle: results from the InCHIANTI study. *J Gerontol A Biol Sci Med Sci*  
41 **2004**;59:249-254.
- 42 10. National Bureau of Statistics. Bulletin of the Seventh National Population  
43 Census (No. 5).  
44 [http://www.stats.gov.cn/tjsj/tjgb/rkpcgb/qgrkpcgb/202106/t20210628\\_181882](http://www.stats.gov.cn/tjsj/tjgb/rkpcgb/qgrkpcgb/202106/t20210628_181882)

1  
2  
3  
4  
5  
6  
7  
8  
9  
10  
11  
12  
13  
14  
15  
16  
17  
18  
19  
20  
21  
22  
23  
24  
25  
26  
27  
28  
29  
30  
31  
32  
33  
34  
35  
36  
37  
38  
39  
40  
41  
42  
43  
44  
45  
46  
47  
48  
49  
50  
51  
52  
53  
54  
55  
56  
57  
58  
59  
60

- [4.html](#). Accessed September 26 2021
11. Qin T, Yan M, Fu Z, *et al*. Association between anemia and cognitive decline among Chinese middle-aged and elderly: evidence from the China health and retirement longitudinal study. *BMC Geriatr* **2019**; 19, 305.
  10. Ruan Y, Guo Y, Kowal P, *et al*. Association between anemia and frailty in 13,175 community-dwelling adults aged 50 years and older in China. *BMC Geriatr* **2019**; 19, 327.
  12. Chang J, Wang Y. Reports of China Nutrition and Health Survey (2010–2013). Peking University Medical Press Co. LTD, Beijing, **2016**.
  13. Xu X, Hall J, Byles J, *et al*. Dietary pattern, serum magnesium, ferritin, C-reactive protein and anaemia among older people. *Clin Nutr* **2017**; 36, 444-451.
  14. Wu Y, Ye H, Liu J, *et al*. Prevalence of anemia and sociodemographic characteristics among pregnant and non-pregnant women in southwest China: a longitudinal observational study. *BMC Pregnancy Childbirth* **2020**; 20, 535.
  15. Ruan Y, Guo Y, Kowal P, *et al*. Association between anemia and frailty in 13,175 community-dwelling adults aged 50 years and older in China. *BMC Geriatr* **2019**; 19:327.
  16. Zhang Q, Qin G, Liu Z, *et al*. Dietary Balance Index-07 and the Risk of Anemia in Middle Aged and Elderly People in Southwest China: A Cross Sectional Study. *Nutrients* **2018**; 10, 162.
  17. Zhang L, Wang F, Wang L, *et al*. Prevalence of chronic kidney disease in China: a cross-sectional survey. *Lancet* **2012**; 379, 815-822.
  18. Zhang M, Liu S, Yang L, *et al*. Prevalence of smoking and knowledge about the smoking hazards among 170,000 Chinese adults: a nationally representative survey in 2013-2014. *Nicotine Tob Res* **2019**; 21, 1644-1651.
  19. Pottel H, Hoste L, Dubourg L, Ebert N, *et al*. An estimated glomerular filtration rate equation for the full age spectrum. *Nephrol Dial Transplant* **2016**; 31,798-806.
  20. World Health Organization. Haemoglobin Concentrations for the Diagnosis of Anaemia and Assessment of Severity. [https://apps.who.int/iris/bitstream/handle/10665/85839/WHO\\_NMH\\_NHD\\_MNM\\_11.1\\_eng.pdf?ua=1](https://apps.who.int/iris/bitstream/handle/10665/85839/WHO_NMH_NHD_MNM_11.1_eng.pdf?ua=1). Accessed July 21 2021.
  21. Lee YG, Chang Y, Kang J, *et al*. Risk factors for incident anemia of chronic diseases: A cohort study. *PLoS One* **2019**; 14, e0216062.
  22. Writing Group of 2018 Chinese Guidelines for the Management of Hypertension, Chinese Hypertension League, Chinese Society of Cardiology, Chinese Medical Doctor Association Hypertension Committee, Hypertension Branch of China International Exchange and Promotive Association for Medical and Health Care, Hypertension Branch of Chinese Geriatric Medical Association. 2018 Chinese guidelines for the management of hypertension. *Chin J Cardiovasc Med* **2019**; 24, 24-56.
  23. Qaseem A, Wilt TJ, Rich R, *et al*. Pharmacologic Treatment of Hypertension

- 1  
2  
3  
4  
5  
6  
7  
8  
9  
10  
11  
12  
13  
14  
15  
16  
17  
18  
19  
20  
21  
22  
23  
24  
25  
26  
27  
28  
29  
30  
31  
32  
33  
34  
35  
36  
37  
38  
39  
40  
41  
42  
43  
44  
45  
46  
47  
48  
49  
50  
51  
52  
53  
54  
55  
56  
57  
58  
59  
60
- 1 in Adults Aged 60 Years or Older to Higher Versus Lower Blood Pressure  
2 Targets: A Clinical Practice Guideline From the American College of  
3 Physicians and the American Academy of Family Physicians. *Ann Intern Med*  
4 **2017**; 166, 430-437.
- 5 24. Wang Q, Zhang X, Fang L, *et al.* Prevalence, awareness, treatment and control  
6 of diabetes mellitus among middle-aged and elderly people in a rural Chinese  
7 population: A cross-sectional study. *PLoS One* **2018**; 13, e0198343.
- 8 25. Joint committee for guideline revision. 2016 Chinese guidelines for the  
9 management of dyslipidemia in adults. *J Geriatr Cardiol* **2018**; 15, 1-29.
- 10 26. National Health Commission of the People's Republic of China. Criteria of  
11 Weight for Adults.  
12 [http://www.nhc.gov.cn/ewebeditor/uploadfile/2013/08/20130808135715967.p](http://www.nhc.gov.cn/ewebeditor/uploadfile/2013/08/20130808135715967.pdf)  
13 [df](http://www.nhc.gov.cn/ewebeditor/uploadfile/2013/08/20130808135715967.pdf). Accessed September 26 **2021**
- 14 27. Harding KL, Aguayo VM, Namirembe G, *et al.* Determinants of anemia  
15 among women and children in Nepal and Pakistan: An analysis of recent  
16 national survey data. *Matern Child Nutr* **2018**; Suppl 4, e12478.
- 17 28. Fiseha T, Adamu A, Tesfaye M, *et al.* Prevalence of anemia in diabetic adult  
18 outpatients in Northeast Ethiopia. *PLoS One* **2019**; 14, e0222111.
- 19 29. Chun MY, Kim JH, Kang JS. Relationship between Self-Reported Sleep  
20 Duration and Risk of Anemia: Data from the Korea National Health and  
21 Nutrition Examination Survey 2016-2017. *Int J Environ Res Public Health*  
22 **2021**; 18:4721.
- 23 30. Hisa K, Haruna M, Hikita N, *et al.* Prevalence of and factors related to anemia  
24 among Japanese adult women: Secondary data analysis using health check-up  
25 database. *Sci Rep* **2019**;9:17048.
- 26 31. Nordenberg D, Yip R, Binkin NJ. The effect of cigarette smoking on  
27 hemoglobin levels and anemia screening. *JAMA* **1990**;264:1556-1559.
- 28 32. Sharma AJ, Addo OY, Mei Z, *et al.* Reexamination of hemoglobin adjustments  
29 to define anemia: altitude and smoking. *Ann N Y Acad Sci* **2019**;1450:190-203.
- 30 33. Pollini G, Maugeri U, Bernardo A, *et al.* Erythrocytes parameters due to aging,  
31 smoking, alcohol consumption and occupational activity in a working  
32 population of petrochemical industry. The Pavia Study. *G Ital Med Lav*  
33 **1989**;11:237-240.
- 34 34. Qin Y, Melse-Boonstra A, Pan X, *et al.* Anemia in relation to body mass index  
35 and waist circumference among Chinese women. *Nutr J* **2013**. doi:  
36 10.1186/1475-2891-1112-1110.
- 37 35. Dandona P, Aljada A, Chaudhuri A, *et al.* Metabolic syndrome: a  
38 comprehensive perspective based on interactions between obesity, diabetes,  
39 and inflammation. *Circulation* **2005**;111,1448-1454.
- 40 36. Schwartz AR, Patil SP, Laffan AM, *et al.* Obesity and obstructive sleep apnea:  
41 pathogenic mechanisms and therapeutic approaches. *Proc Am Thorac Soc*  
42 **2008**; 5, 185-192.
- 43 37. Gauci R, Hunter M, Bruce DG, *et al.* Anemia complicating type 2 diabetes:  
44 Prevalence, risk factors and prognosis. *J Diabetes Complications* **2017**; 31,

1  
2  
3  
4  
5  
6  
7  
8  
9  
10  
11  
12  
13  
14  
15  
16  
17  
18  
19  
20  
21  
22  
23  
24  
25  
26  
27  
28  
29  
30  
31  
32  
33  
34  
35  
36  
37  
38  
39  
40  
41  
42  
43  
44  
45  
46  
47  
48  
49  
50  
51  
52  
53  
54  
55  
56  
57  
58  
59  
60

1169-1174.

38. Thomas MC. The High Prevalence of Anemia in Diabetes Is Linked to Functional Erythropoietin Deficiency. *Semin Nephrol* **2006**; 26, 275-282.
39. Zaribaf F, Entezari MH, Hassanzadeh A, *et al.* Association between dietary iron, iron stores, and serum lipid profile in reproductive age women. *J Educ Health Promot* **2014**; 3: DOI: 10.4103/2277-9531.127586.
40. Ryu SR, Park SK, Jung JY, *et al.* The Prevalence and Management of Anemia in Chronic Kidney Disease Patients: Result from the KoreaN Cohort Study for Outcomes in Patients With Chronic Kidney Disease (KNOW-CKD). *J Korean Med Sci* **2017**; 32, 249-256.

For peer review only

## Tables

**Table 1** Sociodemographic and other characteristics of older adults living in Shenzhen community ( $N=121,981$ )

| Characteristics                   | Total           | 95%CI         |
|-----------------------------------|-----------------|---------------|
| Age (years)                       | 71.28 ± 5.58    | 71.25-71.31   |
| Hb(g/dL)                          | 13.64 ± 1.67    | 13.63-13.65   |
| BMI (Kg/m <sup>2</sup> )          | 23.83 ± 3.17    | 23.81-23.85   |
| SBP (mm Hg)                       | 134.71 ± 17.69  | 134.61-134.81 |
| DBP (mm Hg)                       | 77.23 ± 10.31   | 77.18-77.29   |
| WC (cm)                           | 85.1 ± 8.82     | 85.05-85.15   |
| FBG (mmol/L)                      | 5.96 ± 1.9      | 5.95-5.97     |
| TC(mmol/L)                        | 5.21 ± 2        | 5.20-5.23     |
| TG(mmol/L)                        | 1.57 ± 1.14     | 1.57-1.58     |
| LDL-C(mmol/L)                     | 3.09 ± 1.05     | 3.08-3.09     |
| HDL-C(mmol/L)                     | 1.39 ± 0.51     | 1.39-1.39     |
| eGFR                              | 68.74 ± 16.7    | 68.65-68.83   |
| Sex, n(%)                         |                 |               |
| Male                              | 54649 (44.07%)  | 43.78-44.34   |
| Female                            | 69358 (55.93%)  | 55.66-56.22   |
| Education level, n(%)             |                 |               |
| Not educated                      | 9888 (8.11%)    | 7.95-8.26     |
| Primary education                 | 43441 (35.61%)  | 35.34-35.88   |
| Junior school education and above | 68652 (56.28%)  | 56.00-56.56   |
| Smoking status, n (%)             |                 |               |
| Current smoker                    | 10023 (8.22%)   | 8.06-8.37     |
| Ex-smoker                         | 7546 (6.19%)    | 6.05-6.32     |
| Never-smoker                      | 104412 (85.59%) | 85.40-85.79   |
| Drinking habit, n (%)             |                 |               |
| Non-drinker                       | 101661 (83.34%) | 83.13-83.55   |
| Non-habitual drinker              | 12571 (10.31%)  | 10.14-10.48   |
| Habitual drinker                  | 7749 (6.35%)    | 6.22-6.49     |

1  
2  
3 1  
4 2  
5 2  
6 3 **Table 2** Prevalence of anemia in older adults living in Shenzhen community,  
7 4 according to sociodemographic and other characteristics  
8

| Characteristics                   | Total  | N     | %     | 95%CI       | $\chi^2$ Value | P Value |
|-----------------------------------|--------|-------|-------|-------------|----------------|---------|
| Total                             | 121981 | 18820 | 15.43 | 15.23-15.63 |                |         |
| Sex                               |        |       |       |             | 22.36          | <0.001  |
| Male                              | 53743  | 7946  | 14.79 | 14.49-15.09 |                |         |
| Female                            | 68238  | 10874 | 15.94 | 15.66-16.21 |                |         |
| Education level                   |        |       |       |             | 263.21         | <0.001  |
| Not educated                      | 9888   | 2027  | 20.50 | 19.70-21.30 |                |         |
| Primary education                 | 43441  | 7240  | 16.67 | 16.32-17.02 |                |         |
| Junior school education and above | 68652  | 9553  | 13.92 | 13.66-14.17 |                |         |
| Age group                         |        |       |       |             | 1201.99        | <0.001  |
| 65~69                             | 60043  | 7635  | 12.72 | 12.45-12.98 |                |         |
| 70~74                             | 32750  | 4730  | 14.44 | 14.06-14.82 |                |         |
| 75~79                             | 16599  | 3070  | 18.50 | 17.90-19.09 |                |         |
| 80~                               | 12589  | 3385  | 26.89 | 26.11-27.66 |                |         |
| Smoking status                    |        |       |       |             | 68.89          | <0.001  |
| Current smoker                    | 10023  | 1253  | 12.50 | 11.85-13.15 |                |         |
| Ex-smoker                         | 7546   | 1047  | 13.87 | 13.09-14.65 |                |         |
| Never-smoker                      | 104412 | 16520 | 15.82 | 15.60-16.04 |                |         |
| Drinking habit                    |        |       |       |             | 130.24         | <0.001  |
| Non-drinker                       | 101661 | 16302 | 16.04 | 15.81-16.26 |                |         |
| Non-habitual drinker              | 12571  | 1589  | 12.64 | 12.06-13.22 |                |         |
| Habitual drinker                  | 7749   | 929   | 11.99 | 11.27-12.71 |                |         |
| BMI                               |        |       |       |             | 1522.11        | <0.001  |
| Low weight                        | 4496   | 1504  | 33.45 | 32.07-34.83 |                |         |
| Normal weight                     | 61532  | 11041 | 17.94 | 17.64-18.25 |                |         |
| Overweight                        | 44644  | 5175  | 11.59 | 11.29-11.89 |                |         |
| Obesity                           | 11309  | 1100  | 9.73  | 9.18-10.27  |                |         |
| Central obesity                   |        |       |       |             | 540.10         | <0.001  |
| Yes                               | 49051  | 5897  | 12.02 | 11.73-12.31 |                |         |
| No                                | 72930  | 12923 | 17.72 | 17.44-18.00 |                |         |
| Diabetes                          |        |       |       |             | 27.05          | <0.001  |
| Yes                               | 27220  | 4520  | 16.61 | 16.16-17.05 |                |         |
| No                                | 94761  | 14300 | 15.09 | 14.86-15.32 |                |         |
| Hypertension                      |        |       |       |             | 63.27          | <0.001  |
| Yes                               | 67835  | 9883  | 14.57 | 14.30-14.83 |                |         |
| No                                | 54146  | 8937  | 16.51 | 16.19-16.82 |                |         |
| Dyslipidemia                      |        |       |       |             | 211.72         | <0.001  |
| Yes                               | 54564  | 7354  | 13.48 | 13.19-13.76 |                |         |
| No                                | 67417  | 11466 | 17.01 | 16.72-17.29 |                |         |
| CKD                               |        |       |       |             | 624.34         | <0.001  |

|     |       |       |       |             |
|-----|-------|-------|-------|-------------|
| Yes | 37927 | 7574  | 19.97 | 19.57-20.37 |
| No  | 84054 | 11246 | 13.38 | 13.15-13.61 |

1  
2  
3  
4  
5  
6  
7  
8  
9  
10  
11  
12  
13  
14  
15  
16  
17  
18  
19  
20  
21  
22  
23  
24  
25  
26  
27  
28  
29  
30  
31  
32  
33  
34  
35  
36  
37  
38  
39  
40  
41  
42  
43  
44  
45  
46  
47  
48  
49  
50  
51  
52  
53  
54  
55  
56  
57  
58  
59  
60

1 A two-sided value of  $P < 0.05$  was considered to be statistically significant.

2

3

4

5

6

7

8

9

10

11

12

13

14

15

16

17

18

19

20

21

22

For peer review only



1  
2  
3  
4  
5  
6  
7  
8  
9  
10  
11  
12  
13  
14  
15  
16  
17  
18  
19  
20  
21  
22  
23  
24  
25  
26  
27  
28  
29  
30  
31  
32  
33  
34  
35  
36  
37  
38  
39  
40  
41  
42  
43  
44  
45  
46  
47  
48  
49  
50  
51  
52  
53  
54  
55  
56  
57  
58  
59  
60

1

2 **Figure legends**

3 Fig 1 Risk factor analyses of the prevalence of anemia in older adults living in  
4 Shenzhen community

For peer review only

| Characteristics                   | AOR(95%CI)       |
|-----------------------------------|------------------|
| <b>Gender</b>                     |                  |
| Female                            | 1                |
| Male                              | 1.00 (0.97–1.04) |
| <b>Education level</b>            |                  |
| Not educated                      | 1                |
| Primary education                 | 0.89 (0.84–0.94) |
| Junior school education and above | 0.72 (0.68–0.76) |
| <b>Age group</b>                  |                  |
| 65~69                             | 1                |
| 70~74                             | 1.10 (1.06–1.15) |
| 75~79                             | 1.37 (1.31–1.44) |
| 80~                               | 1.96 (1.86–2.06) |
| <b>Smoking status</b>             |                  |
| Never-smoker                      | 1                |
| Current smoker                    | 0.84 (0.78–0.89) |
| Ex-smoker                         | 1.00 (0.93–1.08) |
| <b>Drinking habit</b>             |                  |
| Non-drinker                       | 1                |
| Non-habitual drinker              | 0.86 (0.81–0.92) |
| Habitual drinker                  | 0.81 (0.75–0.87) |
| <b>BMI</b>                        |                  |
| Normal weight                     | 1                |
| Underweight                       | 2.06 (1.93–2.20) |
| Overweight                        | 0.67 (0.64–0.70) |
| Obesity                           | 0.57 (0.53–0.61) |
| <b>Central obesity</b>            |                  |
| No                                | 1                |
| Yes                               | 0.86 (0.82–0.89) |
| <b>Diabetes</b>                   |                  |
| No                                | 1                |
| Yes                               | 1.23 (1.19–1.28) |
| <b>Hypertension</b>               |                  |
| No                                | 1                |
| Yes                               | 0.86 (0.83–0.89) |
| <b>Dyslipidemia</b>               |                  |
| No                                | 1                |
| Yes                               | 0.81 (0.78–0.84) |
| <b>CKD</b>                        |                  |
| No                                | 1                |
| Yes                               | 1.41 (1.36–1.46) |

For peer review only

**STROBE 2007 (v4) Statement—Checklist of items that should be included in reports of *cross-sectional studies***

| Section/Topic                | Item # | Recommendation                                                                                                                                                                       | Reported on page # |
|------------------------------|--------|--------------------------------------------------------------------------------------------------------------------------------------------------------------------------------------|--------------------|
| <b>Title and abstract</b>    | 1      | (a) Indicate the study’s design with a commonly used term in the title or the abstract                                                                                               | Page 1             |
|                              |        | (b) Provide in the abstract an informative and balanced summary of what was done and what was found                                                                                  | Page 2             |
| <b>Introduction</b>          |        |                                                                                                                                                                                      |                    |
| Background/rationale         | 2      | Explain the scientific background and rationale for the investigation being reported                                                                                                 | Page 4             |
| Objectives                   | 3      | State specific objectives, including any prespecified hypotheses                                                                                                                     | Page 4             |
| <b>Methods</b>               |        |                                                                                                                                                                                      |                    |
| Study design                 | 4      | Present key elements of study design early in the paper                                                                                                                              | Page 4             |
| Setting                      | 5      | Describe the setting, locations, and relevant dates, including periods of recruitment, exposure, follow-up, and data collection                                                      | Page 4             |
| Participants                 | 6      | (a) Give the eligibility criteria, and the sources and methods of selection of participants                                                                                          | Page 4             |
| Variables                    | 7      | Clearly define all outcomes, exposures, predictors, potential confounders, and effect modifiers. Give diagnostic criteria, if applicable                                             | Page 5-6           |
| Data sources/<br>measurement | 8*     | For each variable of interest, give sources of data and details of methods of assessment (measurement). Describe comparability of assessment methods if there is more than one group | Page 5-6           |
| Bias                         | 9      | Describe any efforts to address potential sources of bias                                                                                                                            | Page 6             |
| Study size                   | 10     | Explain how the study size was arrived at                                                                                                                                            | Page 4             |
| Quantitative variables       | 11     | Explain how quantitative variables were handled in the analyses. If applicable, describe which groupings were chosen and why                                                         | Not applicable     |
| Statistical methods          | 12     | (a) Describe all statistical methods, including those used to control for confounding                                                                                                | Page 6             |
|                              |        | (b) Describe any methods used to examine subgroups and interactions                                                                                                                  | Not applicable     |
|                              |        | (c) Explain how missing data were addressed                                                                                                                                          | Not applicable     |
|                              |        | (d) If applicable, describe analytical methods taking account of sampling strategy                                                                                                   | Not applicable     |
|                              |        | (e) Describe any sensitivity analyses                                                                                                                                                | Not applicable     |
| <b>Results</b>               |        |                                                                                                                                                                                      |                    |

|                          |     |                                                                                                                                                                                                              |                |
|--------------------------|-----|--------------------------------------------------------------------------------------------------------------------------------------------------------------------------------------------------------------|----------------|
| Participants             | 13* | (a) Report numbers of individuals at each stage of study—eg numbers potentially eligible, examined for eligibility, confirmed eligible, included in the study, completing follow-up, and analysed            | Page 4         |
|                          |     | (b) Give reasons for non-participation at each stage                                                                                                                                                         | Not applicable |
|                          |     | (c) Consider use of a flow diagram                                                                                                                                                                           | Not applicable |
| Descriptive data         | 14* | (a) Give characteristics of study participants (eg demographic, clinical, social) and information on exposures and potential confounders                                                                     | Page 7         |
|                          |     | (b) Indicate number of participants with missing data for each variable of interest                                                                                                                          | Not applicable |
| Outcome data             | 15* | Report numbers of outcome events or summary measures                                                                                                                                                         | Page 7         |
| Main results             | 16  | (a) Give unadjusted estimates and, if applicable, confounder-adjusted estimates and their precision (eg, 95% confidence interval). Make clear which confounders were adjusted for and why they were included | Page 7         |
|                          |     | (b) Report category boundaries when continuous variables were categorized                                                                                                                                    | Page 7         |
|                          |     | (c) If relevant, consider translating estimates of relative risk into absolute risk for a meaningful time period                                                                                             | Page 7         |
| Other analyses           | 17  | Report other analyses done—eg analyses of subgroups and interactions, and sensitivity analyses                                                                                                               | Not applicable |
| <b>Discussion</b>        |     |                                                                                                                                                                                                              |                |
| Key results              | 18  | Summarise key results with reference to study objectives                                                                                                                                                     | Page 7-8       |
| Limitations              | 19  | Discuss limitations of the study, taking into account sources of potential bias or imprecision. Discuss both direction and magnitude of any potential bias                                                   | Page 8-9       |
| Interpretation           | 20  | Give a cautious overall interpretation of results considering objectives, limitations, multiplicity of analyses, results from similar studies, and other relevant evidence                                   | Page 7-9       |
| Generalisability         | 21  | Discuss the generalisability (external validity) of the study results                                                                                                                                        | Page 9         |
| <b>Other information</b> |     |                                                                                                                                                                                                              |                |
| Funding                  | 22  | Give the source of funding and the role of the funders for the present study and, if applicable, for the original study on which the present article is based                                                | Page 9         |

\*Give information separately for cases and controls in case-control studies and, if applicable, for exposed and unexposed groups in cohort and cross-sectional studies.

**Note:** An Explanation and Elaboration article discusses each checklist item and gives methodological background and published examples of transparent reporting. The STROBE checklist is best used in conjunction with this article (freely available on the Web sites of PLoS Medicine at <http://www.plosmedicine.org/>, Annals of Internal Medicine at <http://www.annals.org/>, and Epidemiology at <http://www.epidem.com/>). Information on the STROBE Initiative is available at [www.strobe-statement.org](http://www.strobe-statement.org).

# BMJ Open

## Anemia and associated factors among older adults in an urban district in China: a large-scale cross-sectional study

|                                 |                                                                                                                                                                                                                                                                                                                                                                                                                                                                                                                                                                                                                                  |
|---------------------------------|----------------------------------------------------------------------------------------------------------------------------------------------------------------------------------------------------------------------------------------------------------------------------------------------------------------------------------------------------------------------------------------------------------------------------------------------------------------------------------------------------------------------------------------------------------------------------------------------------------------------------------|
| Journal:                        | <i>BMJ Open</i>                                                                                                                                                                                                                                                                                                                                                                                                                                                                                                                                                                                                                  |
| Manuscript ID                   | bmjopen-2021-056100.R2                                                                                                                                                                                                                                                                                                                                                                                                                                                                                                                                                                                                           |
| Article Type:                   | Original research                                                                                                                                                                                                                                                                                                                                                                                                                                                                                                                                                                                                                |
| Date Submitted by the Author:   | 30-Nov-2021                                                                                                                                                                                                                                                                                                                                                                                                                                                                                                                                                                                                                      |
| Complete List of Authors:       | Ni, Wenqing; Shenzhen Center for Chronic Disease Control, Department of Elderly Health Management<br>Yuan, Xueli; Shenzhen Center for Chronic Disease Control, Department of Elderly Health Management<br>Sun, Yuanying; Shenzhen Center for Chronic Disease Control, Department of Elderly Health Management<br>Zhang, Hong; Shenzhen Center for Chronic Disease Control, Department of Elderly Health Management<br>Zhang, Yan; Shenzhen Center for Chronic Disease Control, Department of Elderly Health Management<br>Xu, Jian; Shenzhen Nanshan Center for Chronic Disease Control, Department of Elderly Health Management |
| <b>Primary Subject Heading</b>: | Epidemiology                                                                                                                                                                                                                                                                                                                                                                                                                                                                                                                                                                                                                     |
| Secondary Subject Heading:      | Epidemiology, Public health                                                                                                                                                                                                                                                                                                                                                                                                                                                                                                                                                                                                      |
| Keywords:                       | Anaemia < HAEMATOLOGY, EPIDEMIOLOGY, Risk management < HEALTH SERVICES ADMINISTRATION & MANAGEMENT                                                                                                                                                                                                                                                                                                                                                                                                                                                                                                                               |
|                                 |                                                                                                                                                                                                                                                                                                                                                                                                                                                                                                                                                                                                                                  |

SCHOLARONE™  
Manuscripts



I, the Submitting Author has the right to grant and does grant on behalf of all authors of the Work (as defined in the below author licence), an exclusive licence and/or a non-exclusive licence for contributions from authors who are: i) UK Crown employees; ii) where BMJ has agreed a CC-BY licence shall apply, and/or iii) in accordance with the terms applicable for US Federal Government officers or employees acting as part of their official duties; on a worldwide, perpetual, irrevocable, royalty-free basis to BMJ Publishing Group Ltd ("BMJ") its licensees and where the relevant Journal is co-owned by BMJ to the co-owners of the Journal, to publish the Work in this journal and any other BMJ products and to exploit all rights, as set out in our [licence](#).

The Submitting Author accepts and understands that any supply made under these terms is made by BMJ to the Submitting Author unless you are acting as an employee on behalf of your employer or a postgraduate student of an affiliated institution which is paying any applicable article publishing charge ("APC") for Open Access articles. Where the Submitting Author wishes to make the Work available on an Open Access basis (and intends to pay the relevant APC), the terms of reuse of such Open Access shall be governed by a Creative Commons licence – details of these licences and which [Creative Commons](#) licence will apply to this Work are set out in our licence referred to above.

Other than as permitted in any relevant BMJ Author's Self Archiving Policies, I confirm this Work has not been accepted for publication elsewhere, is not being considered for publication elsewhere and does not duplicate material already published. I confirm all authors consent to publication of this Work and authorise the granting of this licence.

1  
2  
3  
4 1 **Anemia and associated factors among older adults in an urban**  
5  
6 2 **district in China: a large-scale cross-sectional study**  
7  
8  
9 3

10  
11 4 Wenqing Ni<sup>1#</sup>, Xueli Yuan<sup>1#</sup>, Yuanying Sun<sup>1</sup>, Hongmin Zhang<sup>1</sup>,  
12  
13  
14 5 Yan Zhang<sup>1</sup>, Jian Xu<sup>1</sup>  
15

16  
17 6 <sup>1</sup>Department of Elderly Health Management, Shenzhen Center for Chronic Disease  
18  
19 7 Control, Shenzhen, Guangdong, 518020, China

20  
21 8 # These authors contributed equally to this work.  
22

23  
24 9  
25 10 \*Corresponding author :

26 11 Jian Xu, Ph.D.

27 12 Shenzhen Center for Chronic Disease Control

28 13 No.2021, Buxin Rd. Shenzhen, Guangdong 518020, P.R. China  
29

30 14  
31 15 Tel: 86-755-25506942

32 16 Fax: 86-755-25506942

33 17 E-mail: [anniexu73@126.com](mailto:anniexu73@126.com)  
34  
35  
36  
37  
38  
39  
40  
41  
42  
43  
44  
45  
46  
47  
48  
49  
50  
51  
52  
53  
54  
55  
56  
57  
58  
59  
60

**Abstract**

**Objective:** Anemia leads to poor health outcomes in older adults; however, most current research in China has focused on younger adults. The present study aimed to investigate the prevalence of anemia and its associated factors in older adults in an urban district in China.

**Design:** A cross-sectional study.

**Setting:** An urbanized region, Shenzhen, China.

**Participants:** A total of 121,981 participants aged  $\geq 65$  years were recruited at local community health service centers in Shenzhen from January to December 2018.

**Primary outcomes:** The prevalence of anemia was analyzed and potential associated factors were evaluated.

**Results:** The mean hemoglobin level was  $13.64 \pm 1.67$ g/dL and the prevalence of anemia was 15.43%. The prevalences of mild, moderate, and severe anemia were 12.24%, 2.94%, and 0.25% respectively. Anemia was positively associated with older age, being underweight (adjusted odds ratio (AOR): 2.06, 95% confidence interval (CI): 1.93–2.20), diabetes (AOR: 1.23, 95% CI: 1.19–1.28), and chronic kidney disease (AOR: 1.41, 95% CI: 1.36–1.46), and inversely with higher education level, current-smoker (AOR: 0.84, 95% CI: 0.78–0.89), non-habitual drinker (AOR: 0.86, 95% CI: 0.81–0.92), habitual drinker (AOR: 0.81, 95% CI: 0.75–0.87), overweight (AOR: 0.67, 95% CI: 0.64–0.70), obesity (AOR: 0.57, 95% CI: 0.53–0.61), central obesity (AOR: 0.86, 95% CI: 0.82–0.89), hypertension (AOR: 0.86, 95% CI: 0.83–0.89), and dyslipidemia (AOR: 0.81, 95% CI: 0.78–0.84).

**Conclusion:** Anemia is prevalent among people aged 65 years and older in China. Screening of high-risk populations and treatment of senile anemia should be a top priority in Shenzhen, and should be listed as important public health intervention measures for implementation.

**Keywords:** older adults, anemia, epidemiologic study, risk factor



### Strengths and limitations of this study

■ This was the first large-scale cross-sectional study to assess the prevalence of anemia and its factors in an urban district in China.

■ This study had a sufficiently large sample size to detect significant differences in the prevalence of anemia among older adults.

■ Convenience sampling was used to enroll the population sample.

■ The dataset used in this study did not provide information on the dietary behavior of the participants.

For peer review only

## 1. Introduction

Anemia results from an inadequate number of erythrocytes which leads to a decreased ability to carry oxygen to meet the body's physiological demands. It is characterized by reduced levels of hemoglobin (Hb) in the blood in affected individuals. Anemia may occur at all stages of life, however, older people are among the most vulnerable.<sup>1,2</sup> Globally, 11.0% of men and 10.2% of women aged 65 years and older are anemic.<sup>3</sup> Anemia is a risk factor for a variety of adverse outcomes in the older population, including hospitalization, disability and mortality.<sup>1</sup> Previous studies found higher mortality rates in people aged 65 years and older hospitalized for myocardial infarction, patients with systolic and diastolic chronic heart failure (CHF), and in older CHF patients with anemia.<sup>4-6</sup> Anemia is also an independent risk factor for decline in physical performance and has a negative impact on quality of life, physical functioning, and muscle strength in older individuals.<sup>7-9</sup> Early identification and treatment of anemia is therefore an important strategy to improve the quality of life of older adults with anemia.

In China, 13.5% of the total population (approximately 190.64 million people) were aged 65 years or older in 2020,<sup>10</sup> and increasing life expectancy and declining fertility rates mean that China is experiencing an ongoing aging process. In line with the aging of the population, anemia has become an important public health problem in China. The China Health and Retirement Longitudinal Study showed a prevalence of anemia in middle-aged and older Chinese residents of 12.86% from 2011 to 2012,<sup>11</sup> and the 2010–2012 China National Nutrition and Health Survey found a prevalence of anemia in older Chinese people of 12.6%.<sup>12</sup> Preventing anemia and improving the health of older adults in China are thus urgent issues. However, the only previous trial for preventing anemia examined the use of iron-fortified soy sauce in some cities in China, which aimed to reduce the prevalence of iron-deficiency anemia among women of reproductive age.<sup>13</sup> The prevention of anemia in older adults thus still presents a challenge, and limited measures have been taken to address this public health problem.

Clarifying the risk factors of anemia in the older adults will help to identify the population at risk of anemia, and promote the development of targeted screening and intervention measures. Economic development and living standards are important factors affecting anemia.<sup>14</sup> Most previous studies focused on the prevalence of anemia among middle-aged and older adults in urban and rural districts of China, but there is a lack of large-sample studies of anemia among older adults in urban districts.<sup>11,12,15,16</sup> This study therefore aimed to examine the prevalence of anemia and its related factors among people aged 65 or older in an urban district of China, to help develop strategies for future interventions and the prevention of anemia in older adults living in urban districts in China.

## 2. Materials and methods

### 2.1 Study population

We used convenience sampling to select our study population by recruiting people

aged 65 years and older from the lists of all residents registered at local community health centers in Shenzhen, China, from January 2018 to December 2018. Recruitment activities include pasting posters or placing leaflets in local community health centers and other public places. Electronic posters were also distributed via all the open WeChat groups of local community health center staff, to make the survey easily available to close contacts. The staff of the local community health centers also recruited older adults in their community to participate in the survey by telephone. The eligibility criteria were as follows: (1) lived in Shenzhen for more than 6 months; (2) able to participate in the study and give informed consent; and (3) conscious and able to cooperate to complete the face-to-face interview, medical examinations and biomedical tests. Prisoners are not free to visit community health centres, and we excluded residents living in prisons. A total of 141,684 individuals were recruited in this study, accounting for 36.9% (141,684/383,700) of the resident older adult population in Shenzhen according to the 2015 population census. Data were collected at examination centers in local community health centers in the participants' residential areas. Participants were asked to complete a questionnaire, provide a fasting blood sample, and undergo physical examinations. A total of 19,703 respondents were excluded because of failure to fulfil one or all of these requirements. Finally, 121,981 participants (86.09%) were included in the final data analysis.

## 2.2 Questionnaire survey

Prior to the study, all investigators completed a training course to understand the methodology and process of the study. Working manuals containing questionnaire techniques, blood pressure measurement, anthropometric measurements, biological sample collection, and processing information were distributed to all the investigators.

Data were recorded by face-to-face interview 1 hour after blood collection. All participants completed a standardized questionnaire including questions on sociodemographic status (e.g., date of birth, sex, education level, marital status), past medical history (e.g., history of previous disease, operation history, history of trauma), family health history (e.g., hypertension, diabetes, coronary heart disease, malignant tumor, stroke), lifestyle (e.g., smoking, physical activity, alcohol consumption), and medication use, under the supervision of trained general practitioners and nurses. Educational level was categorized into three groups according to the number of years of education: not educated; primary education (1–6 years of education); and junior high school education and above ( $\geq 7$  years of education). Regarding drinking habits, participants were classified as habitual drinkers (drink at least once a day), non-habitual drinkers (six times a week to once a month), or non-drinker (almost never).<sup>17</sup> Based on a previous study, we divided participants into current smokers, ex-smokers, and never-smokers.<sup>18</sup>

## 2.3 Physical examination

Anthropometric examinations were carried out in the morning after overnight fasting, and body measurements were taken by trained examiners based on a standardized protocol. Height and weight were measured with the participants wearing light clothing without shoes, using analogue scales. Waist circumference (WC) was measured at the end of normal expiration at the midpoint level of the

1 mid-axillary line between the 12th rib head and the superior anterior iliac spine. Body  
2 mass index (BMI) was calculated by dividing body weight (in kilograms) by height  
3 squared (in meters). Blood pressure was measured twice in both arms supported at  
4 heart level with the participants in a sitting position, using a calibrated electronic  
5 sphygmomanometer and the higher level was recorded and used for statistical  
6 analysis. To obtain accurate readings, the participants were asked to rest for at least 5  
7 min before the measurement, or if they had engaged in excessive exercise prior to the  
8 visit, to rest for at least 30 min before the measurement.

#### 9 **2.4 Blood sample collection and biochemical analyses**

10 Venous blood samples were taken after overnight fasting for at least 8 hours. All  
11 blood samples were analyzed in clinical laboratories at the grade 2 hospitals to which  
12 the community health centers were directly affiliated. All the laboratories had  
13 successfully completed a standardization and competency program. Fasting venous  
14 blood was used to measure levels of Hb, plasma glucose, creatinine, total cholesterol  
15 (TC), triglycerides (TG), low-density lipoprotein cholesterol (LDL-C), and  
16 high-density lipoprotein cholesterol (HDL-C) using an automatic biochemistry  
17 analyzer. Biochemical analysis of fresh blood samples was completed within 4 hours.  
18 Serum creatinine was used to calculate the estimated glomerular filtration rate (eGFR)  
19 using the full age spectrum equation.<sup>19</sup>

#### 20 **2.5 Operational definitions/measurements**

21 Anemia was defined as a Hb concentration < 13 g/dL in men and < 12 g/dL in  
22 women, according to World Health Organization standards.<sup>20</sup> The severity of anemia  
23 was classified as mild (11–11.9 g/dL (women), 11–12.9 g/dL (men)), moderate (8–  
24 10.9 g/dL), and severe (<8 g/dL).<sup>20</sup> Chronic kidney disease (CKD) was defined as  
25 eGFR < 60 mL/min/1.73 m<sup>2</sup>.<sup>21</sup> A diagnosis of hypertension was considered in  
26 participants with three consecutive high readings ( $\geq 140$  systolic and/or  $\geq 90$  mm  
27 Hg diastolic) with 2-week intervals or self-reported treatment with antihypertensive  
28 medication within the previous 2 weeks.<sup>22, 23</sup> Participants who met one of the  
29 following three criteria were diagnosed with diabetes: (1) previously diagnosed by  
30 professional doctors, (2) fasting plasma glucose (FBG)  $\geq 7.0$  mmol/L, and (3) 2-hour  
31 plasma glucose level  $\geq 11.1$  mmol/L.<sup>24</sup> High TC, high TG, high LDL-C, and low  
32 HDL-C were diagnosed according to the 2016 Chinese Guidelines for the  
33 Management of Dyslipidemia in Adults.<sup>25</sup> In this study, we defined dyslipidemia as an  
34 abnormal concentration of one or more lipid components or the use of  
35 anti-dyslipidemia medications in the past 2 weeks.

36 Participants were divided into four groups based on the adult weight criteria  
37 published by the Ministry of Health of China (WS/T 428-2013): BMI < 18.5 kg/m<sup>2</sup>  
38 (low weight), BMI  $\geq 18.5$  kg/m<sup>2</sup> and <24.0 kg/m<sup>2</sup> (normal weight), BMI  $\geq 24.0$  kg/m<sup>2</sup>  
39 and < 28.0 kg/m<sup>2</sup> (overweight), and BMI  $\geq 28.0$  kg/m<sup>2</sup> (obesity). A WC  $\geq 90$  cm for  
40 men and  $\geq 85$  cm for women was defined as central obesity.<sup>26</sup>

#### 41 **2.6 Statistical analyses**

42 Descriptive statistics, including means and standard deviations, were used to  
43 compute continuous variables. Numerical data were expressed as percentages and  
44 compared by  $\chi^2$  tests. Multivariate logistic regression analysis was performed to

1 explore the associations between the prevalence of anemia and associated risk factors.  
2 In the multivariate logistic regression model, the prevalence of anemia was defined as  
3 the dependent variable, and sex, education level, age group, smoking status, drinking  
4 habit, BMI, central obesity, diabetes, hypertension, dyslipidemia and CKD were  
5 defined as the independent variables. Data analysis was carried out using SAS 9.4  
6 (Institute, Cary, NC, USA). A two-sided value of  $P < 0.05$  was considered to be  
7 statistically significant.

## 8 **2.7 Participants and public involvement**

9 Neither the study participants nor the public were involved in the design,  
10 recruitment or conduct of the study. All the participants had the option of receiving a  
11 health check and biochemical results when they visited the local community health  
12 centers.

## 13 **2.8 Ethical Approval Statement**

14 The study received ethical approval from the Center for Chronic Disease Control  
15 in Shenzhen (Grant No: SZCCC-201802, SZCCC-2020-018-01-PJ). The study  
16 complied with the guidelines of the Declaration of Helsinki. Written informed consent  
17 was obtained from uneducated participants before the collection of data and  
18 conducting of the study. For participants who were not educated, the participants and  
19 a proxy (family member) who accompanied the participant in the survey were  
20 informed orally (participant) and in writing (proxy) about the purpose, process, methods,  
21 benefits, and health risks of the study. During the informed consent process, uneducated  
22 older adults and their proxies were able to consult the investigators with questions at any  
23 time. After explaining the concept of informed consent, uneducated older adults provided  
24 verbal agreement, and written informed consent to participate in the study was provided  
25 by their proxy. The consent processes were approved by the committee of the Center for  
26 Chronic Disease Control of Shenzhen.

## 27 **3. Results**

### 28 **3.1 Characteristics of participants**

29 The characteristics of the study participants are shown in Table 1. The mean age  
30 was  $71.28 \pm 5.58$  years (range 65–103 years). There were 54,649 men and 69,358  
31 women, and  $> 50\%$  of participants had a minimum of a junior school education.  
32 Among the study population, 8.22% were current smokers and 6.35% were habitual  
33 drinkers. The mean Hb, BMI, SBP, DBP, WC, FBG, TC, TG, LDL-C, HDL-C, and  
34 eGFR values among all 121,981 participants were  $13.64 \pm 1.67$  g/dL,  $23.83 \pm 3.17$   
35  $\text{kg/m}^2$ ,  $134.71 \pm 17.69$  mmHg,  $77.23 \pm 10.31$  mmHg,  $85.10 \pm 8.82$  cm,  $5.96 \pm 1.90$   
36 mmol/L,  $5.21 \pm 2.00$  mmol/L,  $1.57 \pm 1.14$  mmol/L,  $3.09 \pm 1.05$  mmol/L,  $1.39 \pm 1.05$   
37 mmol/L, and  $68.74 \pm 16.70$  mL/min/1.73m<sup>2</sup>, respectively. A total of 100,762  
38 participants (82.60%) had at least one chronic disease, with hypertension (55.61%),  
39 dyslipidemia (44.73%), CKD (31.09%), and diabetes (22.31%) being the most  
40 prevalent (data not shown).

### 41 **3.2 Prevalence of anemia in different subgroups**

42 The overall prevalence anemia was 15.43% and the prevalences (95% confidence  
43 intervals(CI)) of mild, moderate and severe anemia were 12.24% (12.05-12.42),  
44

2.94% (2.84-3.03) and 0.25% (0.23-0.28) respectively. The prevalence of anemia among subpopulations is shown in Table 2. Anemia was significantly more prevalent in women than in men and generally increased with age. The prevalence was lower among individuals with at least primary-level education, and lower in current smokers and habitual drinkers compared with their counterparts. The prevalence of anemia was higher in participants with low weight and lower in those with overweight, obesity, central obesity, hypertension, or dyslipidemia. Individuals with diabetes or CKD had a higher prevalence of anemia than those without these conditions.

### 3.3 Association between anemia and related variables

Binary logistic regression analysis was carried out with presence or absence of anemia as the dependent variable, and factors in univariate analysis as independent variables to determine the factors influencing anemia. Primary education (adjusted odds ratio (AOR)=0.89, 95%CI:0.84-0.94), junior school education and above (AOR=0.72, 95%CI:0.68-0.76) current-smoker (AOR=0.84, 95%CI:0.78-0.89), non-habitual drinker (AOR=0.86, 95%CI:0.81-0.92), habitual drinker (AOR=0.81, 95%CI:0.75-0.87), overweight (AOR=0.67, 95%CI:0.64-0.70), obesity (AOR=0.57, 95%CI:0.53-0.61), central obesity (AOR=0.86, 95%CI:0.82-0.89), hypertension (AOR=0.86, 95%CI:0.83-0.89), and dyslipidemia (AOR=0.81, 95%CI:0.78-0.84) were independently associated with lower odds for the presence of anemia (Fig. 1), while age 70-74 years (AOR=1.10, 95%CI:1.06-1.15), age 75-79 years (AOR=1.37, 95%CI:1.31-1.44), age  $\geq$  80 years (AOR=1.96, 95%CI:1.86-2.06), underweight (AOR=2.06, 95%CI:1.93-2.20), diabetes (AOR=1.23, 95%CI:1.19-1.28), and CKD (AOR=1.41, 95%CI:1.36-1.46) were independently associated with greater odds (Fig. 1). However, there was no significant difference in the risk of anemia in relation to sex.

## 4. Discussion

This was the first large-scale cross-sectional survey to report the prevalence of anemia in older adults (aged 65 years or older) living in an urban district of China. This study demonstrated that the prevalence of anemia was relatively high, representing a public health problem in Shenzhen. After controlling for the confounding factors we found that the prevalence of anemia varied with education level, age group, smoking status, drinking habit, BMI, central obesity, and some non-communicable diseases. The prevalence of anemia among older adults in an urban district in China in the current study was 15.43%, which was higher than the 12.86% reported in previous national studies in China,<sup>11</sup> but lower than the 18.90% reported in the 2009 national survey in China.<sup>13</sup> The difference in prevalence rates among these studies may have been caused by differences in study design, sample size, and/or the age of the study participants.

The current study found a significant negative correlation between anemia prevalence and educational level. This was consistent with studies conducted in Nepal and Pakistan, which confirmed that a low educational level was a risk factor for anemia.<sup>27</sup> This relationship probably occurs because higher levels of education enable

1 people to earn more and thus escape from the poverty trap. Multivariate analysis also  
2 identified older age as an independent risk factor for anemia, consistent with the  
3 findings of other related studies.<sup>3, 28</sup> The prevalence of anemia increased with age,  
4 with a two-to-three-fold increase (26.89% vs. 12.72%) in people aged > 80 years,  
5 suggesting the need for routine screening for anemia in this high-risk subgroup.

6 Current smokers had a lower risk of anemia than never smokers. Similarly,  
7 previous studies showed that smoking was negatively correlated with the risk of  
8 anemia.<sup>29,30</sup> A multiple logistic regression analysis of the health check-up database of  
9 St. Luke's International Hospital in Tokyo between April 2016 and March 2017  
10 revealed that Japanese women (35–49 years) who were current smokers had a 25%  
11 lower risk of anemia compared with non-smokers, after adjusting for the covariates.<sup>30</sup>  
12 Increased Hb levels in smokers were associated with elevated carboxyhemoglobin  
13 (HbCO), a stable complex of Hb and carbon monoxide (CO), because of the exposure  
14 to excess CO caused by smoking.<sup>31</sup> The form of HbCO decreases oxygen delivery,  
15 and smokers had compensatory elevated Hb to increase erythropoiesis and maintain  
16 oxygen transportation.<sup>32</sup> This might explain why adaptation to excess CO during  
17 smoking was reflected by increases in Hb and RBC mass.<sup>33</sup> Habitual drinking was  
18 also associated with a decreased risk of anemia, with a corresponding OR of 0.81,  
19 consistent with a Korean study.<sup>29</sup> However, the direct causality of this negative  
20 correlation between alcohol drinking and anemia is still unclear.<sup>29</sup> Given the potential  
21 risks of alcohol and tobacco consumption to human health, we do not recommend  
22 increasing alcohol consumption or smoking to protect against anemia.

23 We also found a negative association between increased BMI and anemia  
24 prevalence, in accord with other studies conducted in China, the United States, Nepal,  
25 and Pakistan.<sup>27, 34</sup> The reasons for being underweight may include poor distribution of  
26 inadequate food within the family, food insecurity, poverty, and micronutrient  
27 deficiencies, which tend to coexist with other macronutrient deficiencies. The  
28 underlying mechanism accounting for the significant negative association between  
29 overweight or obesity and anemia risk is unclear; however there are several possible  
30 explanations. First, obese participants are less likely to be malnourished, because  
31 excess calorie intake leads to obesity,<sup>35</sup> and overnutrition in obese participants may  
32 thus be associated with a significant reduction in anemia risk. Second, obese  
33 participants may have a variety of other diseases that could increase Hb levels, such  
34 as obstructive sleep apnea and other obesity-related breathing disorders, which lead to  
35 chronic tissue hypoxia and increased red blood cells.<sup>36</sup>

36 We found that older people with diabetes had higher rates of anemia than  
37 non-diabetics, consistent with previous studies.<sup>37</sup> Evidence indicates that the  
38 incidence and prevalence of anemia in diabetic patients is often associated with  
39 erythropoietin deficiency caused by diabetic kidney damage.<sup>38</sup> Other researchers have  
40 also shown a link between anemia and hypertension, as shown in our current study.<sup>21</sup>

41 This study showed that the prevalence of anemia was low among individuals with  
42 dyslipidemia. A study by Zaribaf et al. found a significant positive correlation  
43 between Hb levels and dyslipidemia.<sup>39</sup> However, this study differed from our study in  
44 that it assessed the relationship between anemia and lipids in premenopausal women,

1  
2  
3  
4  
5  
6  
7  
8  
9  
10  
11  
12  
13  
14  
15  
16  
17  
18  
19  
20  
21  
22  
23  
24  
25  
26  
27  
28  
29  
30  
31  
32  
33  
34  
35  
36  
37  
38  
39  
40  
41  
42  
43  
44  
45  
46  
47  
48  
49  
50  
51  
52  
53  
54  
55  
56  
57  
58  
59  
60

1 whereas our study focused on older adults (aged 65–113 years).<sup>39</sup> In contrast, a study  
2 conducted by other researchers in women of childbearing age found no significant  
3 association between serum LDL and anemia.<sup>39</sup> The reasons for the different results in  
4 terms of the relationship between dyslipidemia and anemia deserve further  
5 investigation. Patients with CKD have defects in renal endocrine function, resulting in  
6 decreased erythropoietin secretion by the kidney, leading to nephrogenic anemia.<sup>40</sup>  
7 Nearly half of all patients with CKD have anemia.<sup>40</sup> The current study found the  
8 similar results.

9 This study had some limitations. First, it was a cross-sectional study and could only  
10 infer correlation, not causation. Second, randomized sampling would represent the  
11 best design for testing the prevalence of anemia and its associated factors among older  
12 adults; however, large random sampling was not practically feasible and we therefore  
13 adopted a convenient sampling method to recruit older adult participants. This was a  
14 major factor preventing the extrapolation of the results to the general population.  
15 Finally, renal disease was assessed based on a one-time GFR measurement, possibly  
16 leading to overestimation of the actual prevalence of CKD. However, these  
17 limitations do not affect the significance of the results, which provide the first  
18 evidence of the prevalence and risk factors of anemia among older adults in urban  
19 China.

## 20 **5. Conclusion**

21 In conclusion, anemia is prevalent among the older adult population in China,  
22 with older age, underweight, diabetes, CKD, and anemia being positively associated  
23 with anemia, and higher education level, current-smoker, drinker, overweight,  
24 obesity, central obesity, hypertension, and dyslipidemia being negatively associated.  
25 Screening of high-risk populations, and treatment of senile anemia should be top  
26 priorities in Shenzhen, and should be listed as important public health intervention  
27 measures for implementation.

## 31 **Acknowledgments**

32 We are grateful to all the volunteers for their participation in the present study,  
33 and to all the investigators for their support and hard work during this survey.

## 35 **Author Contributions**

36 WN, XY, and JX: study conception and design. WN, XY, YS, HZ, YZ, and JX:  
37 performance of research. XY and YS: data analysis and interpretation. WN and XY:  
38 writing the original draft. WN and JX: Writing the review and editing. All authors  
39 have read and agreed to the published version of the manuscript.

## 41 **Funding**

42 This study was supported by the Science and Technology Planning Project of  
43 Shenzhen City, Guangdong Province, China (Grant No. JCYJ20180703145202065),



1  
2  
3  
4  
5  
6  
7  
8  
9  
10  
11  
12  
13  
14  
15  
16  
17  
18  
19  
20  
21  
22  
23  
24  
25  
26  
27  
28  
29  
30  
31  
32  
33  
34  
35  
36  
37  
38  
39  
40  
41  
42  
43  
44  
45  
46  
47  
48  
49  
50  
51  
52  
53  
54  
55  
56  
57  
58  
59  
60

1 the Science and Technology Planning Project of Shenzhen City, Guangdong Province,  
2 China(Grant No. KCXFZ20201221173600001) Shenzhen Medical Key Discipline  
3 Construction Fund, and Sanming Project of Medicine in Shenzhen (Grant No.  
4 SZSM201811093).

### 5 6 **Conflicts of Interest**

7 The authors declare no conflict of interest.

### 8 9 **Patient consent for publication**

10 Not required.

### 11 12 **Ethics approval**

13 This study was approved by the ethical review committee of the Center for  
14 Chronic Disease Control of Shenzhen.

### 15 16 **Data sharing statement**

17 All data generated or analyzed during this study are included in this published  
18 article. No additional data are available.

### 19 20 21 **References**

- 22  
23 1. Working Group on "Expert Consensus on nutrition Prevention and Treatment  
24 of Iron deficiency Anemia" of Chinese Nutrition Society. Expert consensus on  
25 nutrition prevention and treatment of iron deficiency anemia. *Acta Nutrimenta*  
26 *Sinica* **2019**; 41,417-426.
- 27 2. Stevens GA, Finucane MM, De-Regil LM, *et al.* Global, regional, and national  
28 trends in haemoglobin concentration and prevalence of total and severe  
29 anaemia in children and pregnant and non-pregnant women for 1995-2011: a  
30 systematic analysis of population-representative data. *Lancet Glob Health*  
31 **2013**; 1, e16-25.
- 32 3. Bianchi VE. Role of nutrition on anemia in elderly. *Clin Nutr ESPEN* **2016**;  
33 11, e1-e11.
- 34 4. Wu WC, Rathore SS, Wang Y, *et al.* Blood transfusion in elderly patients with  
35 acute myocardial infarction. *N Engl J Med* **2001**; 345, 1230-1236.
- 36 5. Groenveld HF, Januzzi JL, Damman K, *et al.* Anemia and mortality in heart  
37 failure patients a systematic review and meta-analysis. *J Am Coll Cardiol*  
38 **2008**, 52, 818-827.
- 39 6. Ezekowitz JA MF, Armstrong PW. Anemia is common in heart failure and is  
40 associated with poor outcomes: insights from a cohort of 12065 patients with  
41 new-onset heart failure. *Circulation* **2003**; 107, 223-225.
- 42 7. Penninx BW, Guralnik JM, Onder G, *et al.* Anemia and decline in physical  
43 performance among older persons. *Am J Med* **2003**; 115, 104-110.
- 44 8. Penninx BW, Pahor M, Cesari M, *et al.* Anemia is associated with disability

1  
2  
3  
4  
5  
6  
7  
8  
9  
10  
11  
12  
13  
14  
15  
16  
17  
18  
19  
20  
21  
22  
23  
24  
25  
26  
27  
28  
29  
30  
31  
32  
33  
34  
35  
36  
37  
38  
39  
40  
41  
42  
43  
44  
45  
46  
47  
48  
49  
50  
51  
52  
53  
54  
55  
56  
57  
58  
59  
60

- and decreased physical performance and muscle strength in the elderly. *J Am Geriatrics Soc* **2004**; 52, 719-724.
9. Cesari M, Penninx BW, Lauretani F, *et al.* Hemoglobin levels and skeletal muscle: results from the InCHIANTI study. *J Gerontol A Biol Sci Med Sci* **2004**;59:249-254.
10. National Bureau of Statistics. Bulletin of the Seventh National Population Census (No. 5). [http://www.stats.gov.cn/tjsj/tjgb/rkpcgb/qgrkpcgb/202106/t20210628\\_1818824.html](http://www.stats.gov.cn/tjsj/tjgb/rkpcgb/qgrkpcgb/202106/t20210628_1818824.html). Accessed September 26 **2021**
11. Qin T, Yan M, Fu Z, *et al.* Association between anemia and cognitive decline among Chinese middle-aged and elderly: evidence from the China health and retirement longitudinal study. *BMC Geriatr* **2019**; 19, 305.
12. Chang J, Wang Y. Reports of China Nutrition and Health Survey (2010–2013). Peking University Medical Press Co. LTD, Beijing, **2016**.
13. Xu X, Hall J, Byles J, *et al.* Dietary pattern, serum magnesium, ferritin, C-reactive protein and anaemia among older people. *Clin Nutr* **2017**; 36, 444-451.
14. Wu Y, Ye H, Liu J, *et al.* Prevalence of anemia and sociodemographic characteristics among pregnant and non-pregnant women in southwest China: a longitudinal observational study. *BMC Pregnancy Childbirth* **2020**; 20, 535.
15. Ruan Y, Guo Y, Kowal P, *et al.* Association between anemia and frailty in 13,175 community-dwelling adults aged 50 years and older in China. *BMC Geriatr* **2019**; 19:327.
16. Zhang Q, Qin G, Liu Z, *et al.* Dietary Balance Index-07 and the Risk of Anemia in Middle Aged and Elderly People in Southwest China: A Cross Sectional Study. *Nutrients* **2018**; 10, 162.
17. Zhang L, Wang F, Wang L, *et al.* Prevalence of chronic kidney disease in China: a cross-sectional survey. *Lancet* **2012**; 379, 815-822.
18. Zhang M, Liu S, Yang L, *et al.* Prevalence of smoking and knowledge about the smoking hazards among 170,000 Chinese adults: a nationally representative survey in 2013-2014. *Nicotine Tob Res* **2019**; 21, 1644-1651.
19. Pottel H, Hoste L, Dubourg L, Ebert N, *et al.* An estimated glomerular filtration rate equation for the full age spectrum. *Nephrol Dial Transplant* **2016**; 31,798-806.
20. World Health Organization. Haemoglobin Concentrations for the Diagnosis of Anaemia and Assessment of Severity. [https://apps.who.int/iris/bitstream/handle/10665/85839/WHO\\_NMH\\_NHD\\_MNM\\_11.1\\_eng.pdf?ua=1](https://apps.who.int/iris/bitstream/handle/10665/85839/WHO_NMH_NHD_MNM_11.1_eng.pdf?ua=1). Accessed July 21 **2021**.
21. Lee YG, Chang Y, Kang J, *et al.* Risk factors for incident anemia of chronic diseases: A cohort study. *PLoS One* **2019**; 14, e0216062.
22. Writing Group of 2018 Chinese Guidelines for the Management of Hypertension, Chinese Hypertension League, Chinese Society of Cardiology, Chinese Medical Doctor Association Hypertension Committee, Hypertension

- 1  
2  
3  
4 1 Branch of China International Exchange and Promotive Association for  
5 2 Medical and Health Care, Hypertension Branch of Chinese Geriatric  
6 3 Medical Association. 2018 Chinese guidelines for the management of  
7 4 hypertension. *Chin J Cardiovasc Med* **2019**; 24, 24-56.
- 8  
9 23. Qaseem A, Wilt TJ, Rich R, *et al.* Pharmacologic Treatment of Hypertension  
10 6 in Adults Aged 60 Years or Older to Higher Versus Lower Blood Pressure  
11 7 Targets: A Clinical Practice Guideline From the American College of  
12 8 Physicians and the American Academy of Family Physicians. *Ann Intern Med*  
13 9 **2017**; 166, 430-437.
- 14  
15 24. Wang Q, Zhang X, Fang L, *et al.* Prevalence, awareness, treatment and control  
16 11 of diabetes mellitus among middle-aged and elderly people in a rural Chinese  
17 12 population: A cross-sectional study. *PLoS One* **2018**; 13, e0198343.
- 18  
19 25. Joint committee for guideline revision. 2016 Chinese guidelines for the  
20 14 management of dyslipidemia in adults. *J Geriatr Cardiol* **2018**; 15, 1-29.
- 21  
22 26. National Health Commission of the People's Republic of China. Criteria of  
23 16 Weight for Adults.  
24 17 [http://www.nhc.gov.cn/ewebeditor/uploadfile/2013/08/20130808135715967.p](http://www.nhc.gov.cn/ewebeditor/uploadfile/2013/08/20130808135715967.pdf)  
25 18 [df](http://www.nhc.gov.cn/ewebeditor/uploadfile/2013/08/20130808135715967.pdf). Accessed September 26 **2021**
- 26  
27 27. Harding KL, Aguayo VM, Namirembe G, *et al.* Determinants of anemia  
28 20 among women and children in Nepal and Pakistan: An analysis of recent  
29 21 national survey data. *Matern Child Nutr* **2018**; Suppl 4, e12478.
- 30  
31 28. Fiseha T, Adamu A, Tesfaye M, *et al.* Prevalence of anemia in diabetic adult  
32 23 outpatients in Northeast Ethiopia. *PLoS One* **2019**; 14, e0222111.
- 33  
34 29. Chun MY, Kim JH, Kang JS. Relationship between Self-Reported Sleep  
35 25 Duration and Risk of Anemia: Data from the Korea National Health and  
36 26 Nutrition Examination Survey 2016-2017. *Int J Environ Res Public Health*  
37 27 **2021**; 18:4721.
- 38  
39 30. Hisa K, Haruna M, Hikita N, *et al.* Prevalence of and factors related to anemia  
40 29 among Japanese adult women: Secondary data analysis using health check-up  
41 30 database. *Sci Rep* **2019**;9:17048.
- 42  
43 31. Nordenberg D, Yip R, Binkin NJ. The effect of cigarette smoking on  
44 32 hemoglobin levels and anemia screening. *JAMA* **1990**;264:1556-1559.
- 45  
46 32. Sharma AJ, Addo OY, Mei Z, *et al.* Reexamination of hemoglobin adjustments  
47 34 to define anemia: altitude and smoking. *Ann N Y Acad Sci* **2019**;1450:190-203.
- 48  
49 33. Pollini G, Maugeri U, Bernardo A, *et al.* Erythrocytes parameters due to aging,  
50 36 smoking, alcohol consumption and occupational activity in a working  
51 37 population of petrochemical industry. The Pavia Study. *G Ital Med Lav*  
52 38 **1989**;11:237-240.
- 53  
54 34. Qin Y, Melse-Boonstra A, Pan X, *et al.* Anemia in relation to body mass index  
55 40 and waist circumference among Chinese women. *Nutr J* **2013**. doi:  
56 41 10.1186/1475-2891-1112-1110.
- 57  
58 35. Dandona P, Aljada A, Chaudhuri A, *et al.* Metabolic syndrome: a  
59 43 comprehensive perspective based on interactions between obesity, diabetes,  
60 44 and inflammation. *Circulation* **2005**;111,1448-1454.

1  
2  
3  
4  
5  
6  
7  
8  
9  
10  
11  
12  
13  
14  
15  
16  
17  
18  
19  
20  
21  
22  
23  
24  
25  
26  
27  
28  
29  
30  
31  
32  
33  
34  
35  
36  
37  
38  
39  
40  
41  
42  
43  
44  
45  
46  
47  
48  
49  
50  
51  
52  
53  
54  
55  
56  
57  
58  
59  
60

- 1 36. Schwartz AR, Patil SP, Laffan AM, *et al.* Obesity and obstructive sleep apnea:  
2 pathogenic mechanisms and therapeutic approaches. *Proc Am Thorac Soc*  
3 **2008**; 5, 185-192.
- 4 37. Gauci R, Hunter M, Bruce DG, *et al.* Anemia complicating type 2 diabetes:  
5 Prevalence, risk factors and prognosis. *J Diabetes Complications* **2017**; 31,  
6 1169-1174.
- 7 38. Thomas MC. The High Prevalence of Anemia in Diabetes Is Linked to  
8 Functional Erythropoietin Deficiency. *Semin Nephrol* **2006**; 26, 275-282.
- 9 39. Zaribaf F, Entezari MH, Hassanzadeh A, *et al.* Association between dietary  
10 iron, iron stores, and serum lipid profile in reproductive age women. *J Educ*  
11 *Health Promot* **2014**; 3: DOI: 10.4103/2277-9531.127586.
- 12 40. Ryu SR, Park SK, Jung JY, *et al.* The Prevalence and Management of Anemia  
13 in Chronic Kidney Disease Patients: Result from the KoreaN Cohort Study for  
14 Outcomes in Patients With Chronic Kidney Disease (KNOW-CKD). *J Korean*  
15 *Med Sci* **2017**; 32, 249-256.

## Tables

**Table 1** Sociodemographic and other characteristics of older adults living in Shenzhen community ( $N=121,981$ )

| Characteristics                   | Total           | 95%CI         |
|-----------------------------------|-----------------|---------------|
| Age (years)                       | 71.28 ± 5.58    | 71.25-71.31   |
| Hb(g/dL)                          | 13.64 ± 1.67    | 13.63-13.65   |
| BMI (Kg/m <sup>2</sup> )          | 23.83 ± 3.17    | 23.81-23.85   |
| SBP (mm Hg)                       | 134.71 ± 17.69  | 134.61-134.81 |
| DBP (mm Hg)                       | 77.23 ± 10.31   | 77.18-77.29   |
| WC (cm)                           | 85.1 ± 8.82     | 85.05-85.15   |
| FBG (mmol/L)                      | 5.96 ± 1.9      | 5.95-5.97     |
| TC(mmol/L)                        | 5.21 ± 2        | 5.20-5.23     |
| TG(mmol/L)                        | 1.57 ± 1.14     | 1.57-1.58     |
| LDL-C(mmol/L)                     | 3.09 ± 1.05     | 3.08-3.09     |
| HDL-C(mmol/L)                     | 1.39 ± 0.51     | 1.39-1.39     |
| eGFR                              | 68.74 ± 16.7    | 68.65-68.83   |
| Sex, n(%)                         |                 |               |
| Male                              | 54649 (44.07%)  | 43.78-44.34   |
| Female                            | 69358 (55.93%)  | 55.66-56.22   |
| Education level, n(%)             |                 |               |
| Not educated                      | 9888 (8.11%)    | 7.95-8.26     |
| Primary education                 | 43441 (35.61%)  | 35.34-35.88   |
| Junior school education and above | 68652 (56.28%)  | 56.00-56.56   |
| Smoking status, n (%)             |                 |               |
| Current smoker                    | 10023 (8.22%)   | 8.06-8.37     |
| Ex-smoker                         | 7546 (6.19%)    | 6.05-6.32     |
| Never-smoker                      | 104412 (85.59%) | 85.40-85.79   |
| Drinking habit, n (%)             |                 |               |
| Non-drinker                       | 101661 (83.34%) | 83.13-83.55   |
| Non-habitual drinker              | 12571 (10.31%)  | 10.14-10.48   |
| Habitual drinker                  | 7749 (6.35%)    | 6.22-6.49     |

1  
2  
3 1  
4  
5 2  
6 3 **Table 2** Prevalence of anemia in older adults living in Shenzhen community,  
7 4 according to sociodemographic and other characteristics

| Characteristics                   | Total  | Number of anemia | Prevalence of anemia(%) | 95%CI       | $\chi^2$ Value | P Value |
|-----------------------------------|--------|------------------|-------------------------|-------------|----------------|---------|
| Total                             | 121981 | 18820            | 15.43                   | 15.23-15.63 |                |         |
| Sex                               |        |                  |                         |             | 22.36          | <0.001  |
| Male                              | 53743  | 7946             | 14.79                   | 14.49-15.09 |                |         |
| Female                            | 68238  | 10874            | 15.94                   | 15.66-16.21 |                |         |
| Education level                   |        |                  |                         |             | 263.21         | <0.001  |
| Not educated                      | 9888   | 2027             | 20.50                   | 19.70-21.30 |                |         |
| Primary education                 | 43441  | 7240             | 16.67                   | 16.32-17.02 |                |         |
| Junior school education and above | 68652  | 9553             | 13.92                   | 13.66-14.17 |                |         |
| Age group                         |        |                  |                         |             | 1201.99        | <0.001  |
| 65~69                             | 60043  | 7635             | 12.72                   | 12.45-12.98 |                |         |
| 70~74                             | 32750  | 4730             | 14.44                   | 14.06-14.82 |                |         |
| 75~79                             | 16599  | 3070             | 18.50                   | 17.90-19.09 |                |         |
| 80~                               | 12589  | 3385             | 26.89                   | 26.11-27.66 |                |         |
| Smoking status                    |        |                  |                         |             | 68.89          | <0.001  |
| Current smoker                    | 10023  | 1253             | 12.50                   | 11.85-13.15 |                |         |
| Ex-smoker                         | 7546   | 1047             | 13.87                   | 13.09-14.65 |                |         |
| Never-smoker                      | 104412 | 16520            | 15.82                   | 15.60-16.04 |                |         |
| Drinking habit                    |        |                  |                         |             | 130.24         | <0.001  |
| Non-drinker                       | 101661 | 16302            | 16.04                   | 15.81-16.26 |                |         |
| Non-habitual drinker              | 12571  | 1589             | 12.64                   | 12.06-13.22 |                |         |
| Habitual drinker                  | 7749   | 929              | 11.99                   | 11.27-12.71 |                |         |
| BMI                               |        |                  |                         |             | 1522.11        | <0.001  |
| Low weight                        | 4496   | 1504             | 33.45                   | 32.07-34.83 |                |         |
| Normal weight                     | 61532  | 11041            | 17.94                   | 17.64-18.25 |                |         |
| Overweight                        | 44644  | 5175             | 11.59                   | 11.29-11.89 |                |         |
| Obesity                           | 11309  | 1100             | 9.73                    | 9.18-10.27  |                |         |
| Central obesity                   |        |                  |                         |             | 540.10         | <0.001  |
| Yes                               | 49051  | 5897             | 12.02                   | 11.73-12.31 |                |         |
| No                                | 72930  | 12923            | 17.72                   | 17.44-18.00 |                |         |
| Diabetes                          |        |                  |                         |             | 27.05          | <0.001  |
| Yes                               | 27220  | 4520             | 16.61                   | 16.16-17.05 |                |         |
| No                                | 94761  | 14300            | 15.09                   | 14.86-15.32 |                |         |
| Hypertension                      |        |                  |                         |             | 63.27          | <0.001  |
| Yes                               | 67835  | 9883             | 14.57                   | 14.30-14.83 |                |         |

1  
2  
3  
4  
5  
6  
7  
8  
9  
10  
11  
12  
13  
14  
15  
16  
17  
18  
19  
20  
21  
22  
23  
24  
25  
26  
27  
28  
29  
30  
31  
32  
33  
34  
35  
36  
37  
38  
39  
40  
41  
42  
43  
44  
45  
46  
47  
48  
49  
50  
51  
52  
53  
54  
55  
56  
57  
58  
59  
60

|              |       |       |       |             |        |        |
|--------------|-------|-------|-------|-------------|--------|--------|
| No           | 54146 | 8937  | 16.51 | 16.19-16.82 |        |        |
| Dyslipidemia |       |       |       |             | 211.72 | <0.001 |
| Yes          | 54564 | 7354  | 13.48 | 13.19-13.76 |        |        |
| No           | 67417 | 11466 | 17.01 | 16.72-17.29 |        |        |
| CKD          |       |       |       |             | 624.34 | <0.001 |
| Yes          | 37927 | 7574  | 19.97 | 19.57-20.37 |        |        |
| No           | 84054 | 11246 | 13.38 | 13.15-13.61 |        |        |

1 A two-sided value of  $P < 0.05$  was considered to be statistically significant.

2  
3  
4  
5  
6  
7  
8  
9  
10  
11  
12  
13  
14  
15  
16  
17  
18  
19

For peer review only

1  
2  
3  
4  
5  
6  
7  
8  
9  
10  
11  
12  
13  
14  
15  
16  
17  
18  
19  
20  
21  
22  
23  
24  
25  
26  
27  
28  
29  
30  
31  
32  
33  
34  
35  
36  
37  
38  
39  
40  
41  
42  
43  
44  
45  
46  
47  
48  
49  
50  
51  
52  
53  
54  
55  
56  
57  
58  
59  
60

1

2 **Figure legends**

3 Fig 1 Risk factor analyses of the prevalence of anemia in older adults living in  
4 Shenzhen community

For peer review only



| Characteristics                   | AOR(95%CI)       |
|-----------------------------------|------------------|
| <b>Gender</b>                     |                  |
| Female                            | 1                |
| Male                              | 1.00 (0.97–1.04) |
| <b>Education level</b>            |                  |
| Not educated                      | 1                |
| Primary education                 | 0.89 (0.84–0.94) |
| Junior school education and above | 0.72 (0.68–0.76) |
| <b>Age group</b>                  |                  |
| 65~69                             | 1                |
| 70~74                             | 1.10 (1.06–1.15) |
| 75~79                             | 1.37 (1.31–1.44) |
| 80~                               | 1.96 (1.86–2.06) |
| <b>Smoking status</b>             |                  |
| Never-smoker                      | 1                |
| Current smoker                    | 0.84 (0.78–0.89) |
| Ex-smoker                         | 1.00 (0.93–1.08) |
| <b>Drinking habit</b>             |                  |
| Non-drinker                       | 1                |
| Non-habitual drinker              | 0.86 (0.81–0.92) |
| Habitual drinker                  | 0.81 (0.75–0.87) |
| <b>BMI</b>                        |                  |
| Normal weight                     | 1                |
| Underweight                       | 2.06 (1.93–2.20) |
| Overweight                        | 0.67 (0.64–0.70) |
| Obesity                           | 0.57 (0.53–0.61) |
| <b>Central obesity</b>            |                  |
| No                                | 1                |
| Yes                               | 0.86 (0.82–0.89) |
| <b>Diabetes</b>                   |                  |
| No                                | 1                |
| Yes                               | 1.23 (1.19–1.28) |
| <b>Hypertension</b>               |                  |
| No                                | 1                |
| Yes                               | 0.86 (0.83–0.89) |
| <b>Dyslipidemia</b>               |                  |
| No                                | 1                |
| Yes                               | 0.81 (0.78–0.84) |
| <b>CKD</b>                        |                  |
| No                                | 1                |
| Yes                               | 1.41 (1.36–1.46) |

For peer review only

**STROBE 2007 (v4) Statement—Checklist of items that should be included in reports of *cross-sectional studies***

| Section/Topic                | Item # | Recommendation                                                                                                                                                                       | Reported on page # |
|------------------------------|--------|--------------------------------------------------------------------------------------------------------------------------------------------------------------------------------------|--------------------|
| <b>Title and abstract</b>    | 1      | (a) Indicate the study's design with a commonly used term in the title or the abstract                                                                                               | Page 1             |
|                              |        | (b) Provide in the abstract an informative and balanced summary of what was done and what was found                                                                                  | Page 2             |
| <b>Introduction</b>          |        |                                                                                                                                                                                      |                    |
| Background/rationale         | 2      | Explain the scientific background and rationale for the investigation being reported                                                                                                 | Page 4             |
| Objectives                   | 3      | State specific objectives, including any prespecified hypotheses                                                                                                                     | Page 4             |
| <b>Methods</b>               |        |                                                                                                                                                                                      |                    |
| Study design                 | 4      | Present key elements of study design early in the paper                                                                                                                              | Page 4             |
| Setting                      | 5      | Describe the setting, locations, and relevant dates, including periods of recruitment, exposure, follow-up, and data collection                                                      | Page 4             |
| Participants                 | 6      | (a) Give the eligibility criteria, and the sources and methods of selection of participants                                                                                          | Page 4             |
| Variables                    | 7      | Clearly define all outcomes, exposures, predictors, potential confounders, and effect modifiers. Give diagnostic criteria, if applicable                                             | Page 5-6           |
| Data sources/<br>measurement | 8*     | For each variable of interest, give sources of data and details of methods of assessment (measurement). Describe comparability of assessment methods if there is more than one group | Page 5-6           |
| Bias                         | 9      | Describe any efforts to address potential sources of bias                                                                                                                            | Page 6             |
| Study size                   | 10     | Explain how the study size was arrived at                                                                                                                                            | Page 4             |
| Quantitative variables       | 11     | Explain how quantitative variables were handled in the analyses. If applicable, describe which groupings were chosen and why                                                         | Not applicable     |
| Statistical methods          | 12     | (a) Describe all statistical methods, including those used to control for confounding                                                                                                | Page 6             |
|                              |        | (b) Describe any methods used to examine subgroups and interactions                                                                                                                  | Not applicable     |
|                              |        | (c) Explain how missing data were addressed                                                                                                                                          | Not applicable     |
|                              |        | (d) If applicable, describe analytical methods taking account of sampling strategy                                                                                                   | Not applicable     |
|                              |        | (e) Describe any sensitivity analyses                                                                                                                                                | Not applicable     |
| <b>Results</b>               |        |                                                                                                                                                                                      |                    |

|                          |     |                                                                                                                                                                                                              |                |
|--------------------------|-----|--------------------------------------------------------------------------------------------------------------------------------------------------------------------------------------------------------------|----------------|
| Participants             | 13* | (a) Report numbers of individuals at each stage of study—eg numbers potentially eligible, examined for eligibility, confirmed eligible, included in the study, completing follow-up, and analysed            | Page 4         |
|                          |     | (b) Give reasons for non-participation at each stage                                                                                                                                                         | Not applicable |
|                          |     | (c) Consider use of a flow diagram                                                                                                                                                                           | Not applicable |
| Descriptive data         | 14* | (a) Give characteristics of study participants (eg demographic, clinical, social) and information on exposures and potential confounders                                                                     | Page 7         |
|                          |     | (b) Indicate number of participants with missing data for each variable of interest                                                                                                                          | Not applicable |
| Outcome data             | 15* | Report numbers of outcome events or summary measures                                                                                                                                                         | Page 7         |
| Main results             | 16  | (a) Give unadjusted estimates and, if applicable, confounder-adjusted estimates and their precision (eg, 95% confidence interval). Make clear which confounders were adjusted for and why they were included | Page 7         |
|                          |     | (b) Report category boundaries when continuous variables were categorized                                                                                                                                    | Page 7         |
|                          |     | (c) If relevant, consider translating estimates of relative risk into absolute risk for a meaningful time period                                                                                             | Page 7         |
| Other analyses           | 17  | Report other analyses done—eg analyses of subgroups and interactions, and sensitivity analyses                                                                                                               | Not applicable |
| <b>Discussion</b>        |     |                                                                                                                                                                                                              |                |
| Key results              | 18  | Summarise key results with reference to study objectives                                                                                                                                                     | Page 7-8       |
| Limitations              | 19  | Discuss limitations of the study, taking into account sources of potential bias or imprecision. Discuss both direction and magnitude of any potential bias                                                   | Page 8-9       |
| Interpretation           | 20  | Give a cautious overall interpretation of results considering objectives, limitations, multiplicity of analyses, results from similar studies, and other relevant evidence                                   | Page 7-9       |
| Generalisability         | 21  | Discuss the generalisability (external validity) of the study results                                                                                                                                        | Page 9         |
| <b>Other information</b> |     |                                                                                                                                                                                                              |                |
| Funding                  | 22  | Give the source of funding and the role of the funders for the present study and, if applicable, for the original study on which the present article is based                                                | Page 9         |

\*Give information separately for cases and controls in case-control studies and, if applicable, for exposed and unexposed groups in cohort and cross-sectional studies.

**Note:** An Explanation and Elaboration article discusses each checklist item and gives methodological background and published examples of transparent reporting. The STROBE checklist is best used in conjunction with this article (freely available on the Web sites of PLoS Medicine at <http://www.plosmedicine.org/>, Annals of Internal Medicine at <http://www.annals.org/>, and Epidemiology at <http://www.epidem.com/>). Information on the STROBE Initiative is available at [www.strobe-statement.org](http://www.strobe-statement.org).

# BMJ Open

## Anemia and associated factors among older adults in an urban district in China: a large-scale cross-sectional study

|                                 |                                                                                                                                                                                                                                                                                                                                                                                                                                                                                                                                                                                                                                  |
|---------------------------------|----------------------------------------------------------------------------------------------------------------------------------------------------------------------------------------------------------------------------------------------------------------------------------------------------------------------------------------------------------------------------------------------------------------------------------------------------------------------------------------------------------------------------------------------------------------------------------------------------------------------------------|
| Journal:                        | <i>BMJ Open</i>                                                                                                                                                                                                                                                                                                                                                                                                                                                                                                                                                                                                                  |
| Manuscript ID                   | bmjopen-2021-056100.R3                                                                                                                                                                                                                                                                                                                                                                                                                                                                                                                                                                                                           |
| Article Type:                   | Original research                                                                                                                                                                                                                                                                                                                                                                                                                                                                                                                                                                                                                |
| Date Submitted by the Author:   | 30-Jan-2022                                                                                                                                                                                                                                                                                                                                                                                                                                                                                                                                                                                                                      |
| Complete List of Authors:       | Ni, Wenqing; Shenzhen Center for Chronic Disease Control, Department of Elderly Health Management<br>Yuan, Xueli; Shenzhen Center for Chronic Disease Control, Department of Elderly Health Management<br>Sun, Yuanying; Shenzhen Center for Chronic Disease Control, Department of Elderly Health Management<br>Zhang, Hong; Shenzhen Center for Chronic Disease Control, Department of Elderly Health Management<br>Zhang, Yan; Shenzhen Center for Chronic Disease Control, Department of Elderly Health Management<br>Xu, Jian; Shenzhen Nanshan Center for Chronic Disease Control, Department of Elderly Health Management |
| <b>Primary Subject Heading</b>: | Epidemiology                                                                                                                                                                                                                                                                                                                                                                                                                                                                                                                                                                                                                     |
| Secondary Subject Heading:      | Epidemiology, Public health                                                                                                                                                                                                                                                                                                                                                                                                                                                                                                                                                                                                      |
| Keywords:                       | Anaemia < HAEMATOLOGY, EPIDEMIOLOGY, Risk management < HEALTH SERVICES ADMINISTRATION & MANAGEMENT                                                                                                                                                                                                                                                                                                                                                                                                                                                                                                                               |
|                                 |                                                                                                                                                                                                                                                                                                                                                                                                                                                                                                                                                                                                                                  |

SCHOLARONE™  
Manuscripts



I, the Submitting Author has the right to grant and does grant on behalf of all authors of the Work (as defined in the below author licence), an exclusive licence and/or a non-exclusive licence for contributions from authors who are: i) UK Crown employees; ii) where BMJ has agreed a CC-BY licence shall apply, and/or iii) in accordance with the terms applicable for US Federal Government officers or employees acting as part of their official duties; on a worldwide, perpetual, irrevocable, royalty-free basis to BMJ Publishing Group Ltd ("BMJ") its licensees and where the relevant Journal is co-owned by BMJ to the co-owners of the Journal, to publish the Work in this journal and any other BMJ products and to exploit all rights, as set out in our [licence](#).

The Submitting Author accepts and understands that any supply made under these terms is made by BMJ to the Submitting Author unless you are acting as an employee on behalf of your employer or a postgraduate student of an affiliated institution which is paying any applicable article publishing charge ("APC") for Open Access articles. Where the Submitting Author wishes to make the Work available on an Open Access basis (and intends to pay the relevant APC), the terms of reuse of such Open Access shall be governed by a Creative Commons licence – details of these licences and which [Creative Commons](#) licence will apply to this Work are set out in our licence referred to above.

Other than as permitted in any relevant BMJ Author's Self Archiving Policies, I confirm this Work has not been accepted for publication elsewhere, is not being considered for publication elsewhere and does not duplicate material already published. I confirm all authors consent to publication of this Work and authorise the granting of this licence.

1  
2  
3  
4 1 **Anemia and associated factors among older adults in an urban**  
5  
6 2 **district in China: a large-scale cross-sectional study**  
7  
8  
9 3

10  
11 4 Wenqing Ni<sup>1#</sup>, Xueli Yuan<sup>1#</sup>, Yuanying Sun<sup>1</sup>, Hongmin Zhang<sup>1</sup>,  
12  
13  
14 5 Yan Zhang<sup>1</sup>, Jian Xu<sup>1</sup>  
15

16  
17 6 <sup>1</sup>Department of Elderly Health Management, Shenzhen Center for Chronic Disease  
18  
19 7 Control, Shenzhen, Guangdong, 518020, China

20  
21 8 # These authors contributed equally to this work.  
22

23  
24 9  
25 10 \*Corresponding author :

26 11 Jian Xu, Ph.D.

27 12 Shenzhen Center for Chronic Disease Control

28 13 No.2021, Buxin Rd. Shenzhen, Guangdong 518020, P.R. China  
29

30 14  
31 15 Tel: 86-755-25506942

32 16 Fax: 86-755-25506942

33 17 E-mail: [anniexu73@126.com](mailto:anniexu73@126.com)  
34  
35  
36  
37  
38  
39  
40  
41  
42  
43  
44  
45  
46  
47  
48  
49  
50  
51  
52  
53  
54  
55  
56  
57  
58  
59  
60

**Abstract**

**Objective:** Anemia leads to poor health outcomes in older adults; however, most current research in China has focused on younger adults. The present study aimed to investigate the prevalence of anemia and its associated factors in older adults in an urban district in China.

**Design:** A cross-sectional study.

**Setting:** An urbanized region, Shenzhen, China.

**Participants:** A total of 121,981 participants aged  $\geq 65$  years were recruited at local community health service centers in Shenzhen from January to December 2018.

**Primary outcomes:** The prevalence of anemia was analyzed and potential associated factors were evaluated.

**Results:** The mean hemoglobin level was  $13.64 \pm 1.67$ g/dL and the prevalence of anemia was 15.43%. The prevalences of mild, moderate, and severe anemia were 12.24%, 2.94%, and 0.25%, respectively. Anemia was positively associated with older age, being underweight (adjusted odds ratio (AOR): 2.06, 95% confidence interval (CI): 1.93–2.20), diabetes (AOR: 1.23, 95% CI: 1.19–1.28), and chronic kidney disease (AOR: 1.41, 95% CI: 1.36–1.46), and inversely with higher education level, current-smoker (AOR: 0.84, 95% CI: 0.78–0.89), non-habitual drinker (AOR: 0.86, 95% CI: 0.81–0.92), habitual drinker (AOR: 0.81, 95% CI: 0.75–0.87), overweight (AOR: 0.67, 95% CI: 0.64–0.70), obesity (AOR: 0.57, 95% CI: 0.53–0.61), central obesity (AOR: 0.86, 95% CI: 0.82–0.89), hypertension (AOR: 0.86, 95% CI: 0.83–0.89), and dyslipidemia (AOR: 0.81, 95% CI: 0.78–0.84).

**Conclusion:** Anemia is prevalent among people aged 65 years and older in China. Screening of high-risk populations and treatment of senile anemia should be a top priority in Shenzhen, and should be listed as important public health intervention measures for implementation.

**Keywords:** older adults, anemia, epidemiologic study, risk factor

### Strengths and limitations of this study

■ This was the first large-scale cross-sectional study to assess the prevalence of anemia and its factors in an urban district in China.

■ This study had a sufficiently large sample size to detect significant differences in the prevalence of anemia among older adults.

■ Convenience sampling was used to enroll the population sample.

■ The dataset used in this study did not provide information on the dietary behavior of the participants.

For peer review only



## 1. Introduction

Anemia results from an inadequate number of erythrocytes which leads to a decreased ability to carry oxygen to meet the body's physiological demands. It is characterized by reduced levels of hemoglobin (Hb) in the blood in affected individuals. Anemia may occur at all stages of life, however, older people are among the most vulnerable.<sup>1,2</sup> Globally, 11.0% of men and 10.2% of women aged 65 years and older are anemic.<sup>3</sup> Anemia is a risk factor for a variety of adverse outcomes in the older population, including hospitalization, disability and mortality.<sup>1</sup> Previous studies found higher mortality rates in people aged 65 years and older hospitalized for myocardial infarction, patients with systolic and diastolic chronic heart failure (CHF), and in older CHF patients with anemia.<sup>4-6</sup> Anemia is also an independent risk factor for decline in physical performance and has a negative impact on quality of life, physical functioning, and muscle strength in older individuals.<sup>7-9</sup> Early identification and treatment of anemia is therefore an important strategy to improve the quality of life of older adults with anemia.

In China, 13.5% of the total population (approximately 190.64 million people) were aged 65 years or older in 2020,<sup>10</sup> and increasing life expectancy and declining fertility rates mean that China is experiencing an ongoing aging process. In line with the aging of the population, anemia has become an important public health problem in China. The China Health and Retirement Longitudinal Study showed a prevalence of anemia in middle-aged and older Chinese residents of 12.86% from 2011 to 2012,<sup>11</sup> and the 2010–2012 China National Nutrition and Health Survey found a prevalence of anemia in older Chinese people of 12.6%.<sup>12</sup> Preventing anemia and improving the health of older adults in China are thus urgent issues. However, the only previous trial for preventing anemia examined the use of iron-fortified soy sauce in some cities in China, which aimed to reduce the prevalence of iron-deficiency anemia among women of reproductive age.<sup>13</sup> The prevention of anemia in older adults thus still presents a challenge, and limited measures have been taken to address this public health problem.

Clarifying the risk factors of anemia in the older adults will help to identify the population at risk of anemia, and promote the development of targeted screening and intervention measures. Economic development, living standards, body mass index (BMI), chronic disease and specific risk factors, chronic kidney disease (CKD), older age are important factors affecting anemia.<sup>1,3,14,15</sup> Most previous studies focused on the prevalence of anemia among middle-aged and older adults in urban and rural districts of China, but there is a lack of large-sample studies of anemia among older adults in urban districts.<sup>11,12,16,17</sup> This study therefore aimed to examine the prevalence of anemia and its related factors among people aged 65 or older in an urban district of China, to help develop strategies for future interventions and the prevention of anemia in older adults living in urban districts in China.

## 2. Materials and methods

### 2.1 Study population

1 We recruited participants aged 65 years and older from the lists of all residents  
2 registered at local community health centers in Shenzhen by convenient sampling  
3 method, from January 2018 to December 2018. The staff of the local community  
4 health centers recruited older adults in their community to participate in the survey by  
5 pasting posters, placing leaflets, telephone, distributed electronic posters via Wechat.  
6 The eligibility criteria were as follows: (1) lived in Shenzhen for more than 6 months;  
7 (2) able to participate in the study and give informed consent; and (3) conscious and  
8 able to cooperate to complete the face-to-face interview, medical examinations and  
9 biomedical tests. Prisoners are not free to visit community health centres, and we  
10 excluded residents living in prisons. A total of 141,684 individuals were recruited in  
11 this study, accounting for 36.9% (141,684/383,700) of the resident older adult  
12 population in Shenzhen according to the 2015 population census. Data were collected  
13 at examination centers in local community health centers in the participants'  
14 residential areas. Participants were asked to complete a questionnaire, provide a  
15 fasting blood sample, and undergo physical examinations. A total of 19,703  
16 respondents were excluded because of failure to fulfil one or all of these requirements.  
17 Finally, 121,981 participants (86.09%) were included in the final data analysis.

## 18 **2.2 Questionnaire survey**

19 Prior to the study, all investigators completed a training course to understand the  
20 methodology and process of the study. Working manuals containing questionnaire  
21 techniques, blood pressure measurement, anthropometric measurements, biological  
22 sample collection, and processing information were distributed to all the investigators.

23 Data were recorded by face-to-face interview 1 hour after blood collection.  
24 Detailed sociodemographic characteristics and health parameters were collected by a  
25 standardized questionnaire including age, sex, education level, marital status, past  
26 medical history, family health history, lifestyle behaviors, and medication use.  
27 Participants were categorized according to the level of education into three categories:  
28 not educated; primary education; and junior high school education and above.  
29 Regarding drinking habits, participants were classified as habitual drinkers (drink at  
30 least once a day), non-habitual drinkers (six times a week to once a month), or  
31 non-drinker (almost never).<sup>18</sup> Based on a previous study, we divided participants into  
32 current smokers, ex-smokers, and never-smokers.<sup>19</sup>

## 33 **2.3 Physical examination**

34 Anthropometric examinations were carried out in the morning after overnight  
35 fasting by standard methods. Body height, weight and waist circumference (WC) of  
36 the participants were measured, and BMI was calculated. Blood pressure was  
37 measured twice in both arms supported at heart level with the participants in a sitting  
38 position, using a calibrated electronic sphygmomanometer and the higher level was  
39 recorded and used for statistical analysis. To obtain accurate readings, the participants  
40 were asked to rest for at least 5 min before the measurement, or if they had engaged in  
41 excessive exercise prior to the visit, to rest for at least 30 min before the  
42 measurement.

## 43 **2.4 Blood sample collection and biochemical analyses**

44 Venous blood samples were taken after overnight fasting for at least 8 hours. All

1 blood samples were analyzed in clinical laboratories at the grade 2 hospitals to which  
2 the community health centers were directly affiliated. All the laboratories had  
3 successfully completed a standardization and competency program. Fasting venous  
4 blood was used to measure levels of Hb, plasma glucose, creatinine, total cholesterol  
5 (TC), triglycerides (TG), low-density lipoprotein cholesterol (LDL-C), and  
6 high-density lipoprotein cholesterol (HDL-C) using an automatic biochemistry  
7 analyzer. Biochemical analysis of fresh blood samples was completed within 4 hours.  
8 Serum creatinine was used to calculate the estimated glomerular filtration rate (eGFR)  
9 using the full age spectrum equation.<sup>20</sup>

## 10 **2.5 Operational definitions/measurements**

11 Anemia was defined as a Hb concentration < 13 g/dL in men and < 12 g/dL in  
12 women, according to World Health Organization standards.<sup>21</sup> The severity of anemia  
13 was classified as mild (11–11.9 g/dL (women), 11–12.9 g/dL (men)), moderate (8–  
14 10.9 g/dL), and severe (<8 g/dL).<sup>21</sup> CKD was defined as eGFR < 60 mL/min/1.73  
15 m<sup>2</sup>.<sup>22</sup> A diagnosis of hypertension was considered in participants with three  
16 consecutive high readings ( $\geq$ 140 mm Hg systolic blood pressure and/or  $\geq$ 90 mm  
17 Hg diastolic blood pressure) with 2-week intervals or self-reported treatment with  
18 antihypertensive medication within the previous 2 weeks.<sup>23, 24</sup> Participants who met  
19 one of the following three criteria were diagnosed with diabetes: (1) previously  
20 diagnosed by professional doctors, (2) fasting plasma glucose (FBG)  $\geq$  7.0 mmol/L,  
21 and (3) 2-hour plasma glucose level  $\geq$  11.1 mmol/L.<sup>25</sup> High TC, high TG, high  
22 LDL-C, and low HDL-C were diagnosed according to the 2016 Chinese Guidelines  
23 for the Management of Dyslipidemia in Adults.<sup>26</sup> In this study, we defined  
24 dyslipidemia as an abnormal concentration of one or more lipid components or the  
25 use of anti-dyslipidemia medications in the past 2 weeks.

26 Participants were divided into four groups based on the adult weight criteria  
27 published by the Ministry of Health of China (WS/T 428-2013): BMI < 18.5 kg/m<sup>2</sup>  
28 (low weight), BMI  $\geq$  18.5 kg/m<sup>2</sup> and <24.0 kg/m<sup>2</sup> (normal weight), BMI  $\geq$  24.0 kg/m<sup>2</sup>  
29 and < 28.0 kg/m<sup>2</sup> (overweight), and BMI  $\geq$  28.0 kg/m<sup>2</sup> (obesity). A WC  $\geq$  90 cm for  
30 men and  $\geq$ 85 cm for women was defined as central obesity.<sup>27</sup>

## 31 **2.6 Statistical analyses**

32 Descriptive statistics, including means and standard deviations, were used to  
33 compute continuous variables. Numerical data were expressed as percentages and  
34 compared by  $\chi^2$  tests. Multivariate logistic regression analysis was performed to  
35 explore the associations between the prevalence of anemia and associated risk factors.  
36 In the multivariate logistic regression model, the prevalence of anemia was defined as  
37 the dependent variable, and sex, education level, age group, smoking status, drinking  
38 habit, BMI, central obesity, diabetes, hypertension, dyslipidemia and CKD were  
39 defined as the independent variables. Data analysis was carried out using SAS 9.4  
40 (Institute, Cary, NC, USA). A two-sided value of  $P < 0.05$  was considered to be  
41 statistically significant.

## 42 **2.7 Participants and public involvement**

43 Neither the study participants nor the public were involved in the design,  
44 recruitment or conduct of the study. All the participants had the option of receiving a

1 health check and biochemical results when they visited the local community health  
2 centers.

### 3 **2.8 Ethical Approval Statement**

4 The study received ethical approval from the Center for Chronic Disease Control  
5 in Shenzhen(Grant No: SZCCC-201802, SZCCC-2020-018-01-PJ). The study  
6 complied with the guidelines of the Declaration of Helsinki. Written informed consent  
7 was obtained from all participants before the collection of data and conducting the  
8 study. For participants who were not educated, the participants and a proxy (family  
9 member) who accompanied the participant in the survey were informed orally  
10 (participant) and in writing (proxy) about the purpose, process, methods, benefits, and  
11 health risks of the study. During the informed consent process, uneducated older adults  
12 and their proxies were able to consult the investigators with questions at any time. After  
13 explaining the concept of informed consent, uneducated older adults provided verbal  
14 agreement, and written informed consent to participate in the study was provided by their  
15 proxy. The consent processes were approved by the committee of the Center for Chronic  
16 Disease Control of Shenzhen.

## 17 **3. Results**

### 18 **3.1 Characteristics of participants**

19 The characteristics of the study participants are shown in Table 1. The mean age  
20 was  $71.28 \pm 5.58$  years (range 65–103 years). There were 54,649 men and 69,358  
21 women, and > 50% of participants had a minimum of a junior school education.  
22 Among the study population, 8.22% were current smokers and 6.35% were habitual  
23 drinkers. The mean Hb, BMI, SBP, DBP, WC, FBG, TC, TG, LDL-C, HDL-C, and  
24 eGFR values among all 121,981 participants were  $13.64 \pm 1.67$  g/dL,  $23.83 \pm 3.17$   
25  $\text{kg/m}^2$ ,  $134.71 \pm 17.69$  mmHg,  $77.23 \pm 10.31$  mmHg,  $85.10 \pm 8.82$  cm,  $5.96 \pm 1.90$   
26 mmol/L,  $5.21 \pm 2.00$  mmol/L,  $1.57 \pm 1.14$  mmol/L,  $3.09 \pm 1.05$  mmol/L,  $1.39 \pm 1.05$   
27 mmol/L, and  $68.74 \pm 16.70$  mL/min/1.73m<sup>2</sup>, respectively. A total of 100,762  
28 participants (82.60%) had at least one chronic disease, with hypertension (55.61%),  
29 dyslipidemia (44.73%), CKD (31.09%), and diabetes (22.31%) being the most  
30 prevalent (data not shown).

### 31 **3.2 Prevalence of anemia in different subgroups**

32 The overall prevalence anemia was 15.43% and the prevalences (95% confidence  
33 intervals(CI)) of mild, moderate and severe anemia were 12.24% (12.05-12.42),  
34 2.94% (2.84-3.03) and 0.25% (0.23-0.28), respectively. The prevalence of anemia  
35 among subpopulations is shown in Table 2. Anemia was significantly more prevalent  
36 in women than in men and generally increased with age. The prevalence was lower  
37 among individuals with at least primary-level education, and lower in current smokers  
38 and habitual drinkers compared with their counterparts. The prevalence of anemia was  
39 higher in participants with low weight and lower in those with overweight, obesity,  
40 central obesity, hypertension, or dyslipidemia. Individuals with diabetes or CKD had a  
41 higher prevalence of anemia than those without these conditions.

### 42 **3.3 Association between anemia and related variables**

43 Binary logistic regression analysis was carried out with presence or absence of

1 anemia as the dependent variable, and factors in univariate analysis as independent  
2 variables to determine the factors influencing anemia. Primary education(adjusted  
3 odds ratio (*AOR*)=0.89, 95%*CI*:0.84-0.94), junior school education and above  
4 (*AOR*=0.72, 95%*CI*:0.68-0.76) current-smoker (*AOR*=0.84, 95%*CI*:0.78-0.89),  
5 non-habitual drinker (*AOR*=0.86, 95%*CI*:0.81-0.92), habitual drinker (*AOR*=0.81,  
6 95%*CI*:0.75-0.87), overweight (*AOR*=0.67, 95%*CI*:0.64-0.70), obesity(*AOR*=0.57,  
7 95%*CI*:0.53-0.61), central obesity (*AOR*=0.86, 95%*CI*:0.82-0.89), hypertension  
8 (*AOR*=0.86, 95%*CI*:0.83-0.89), and dyslipidemia (*AOR*=0.81, 95%*CI*:0.78-0.84) were  
9 independently associated with lower odds for the presence of anemia (Fig. 1), while  
10 age 70-74 years (*AOR*=1.10, 95%*CI*:1.06-1.15) , age 75-79 years (*AOR*=1.37,  
11 95%*CI*:1.31-1.44), age  $\geq$  80 years (*AOR*=1.96, 95%*CI*:1.86-2.06), underweight  
12 (*AOR*=2.06, 95%*CI*:1.93-2.20), diabetes (*AOR*=1.23, 95%*CI*:1.19-1.28), and CKD  
13 (*AOR*=1.41, 95%*CI*:1.36-1.46) were independently associated with greater odds (Fig.  
14 1). However, there was no significant difference in the risk of anemia in relation to  
15 sex.

#### 16 4. Discussion

17 This was the first large-scale cross-sectional survey to report the prevalence of  
18 anemia in older adults (aged 65 years or older) living in an urban district of China.  
19 This study demonstrated that the prevalence of anemia was relatively high,  
20 representing a public health problem in Shenzhen. After controlling for the  
21 confounding factors we found that the prevalence of anemia varied with education  
22 level, age group, smoking status, drinking habit, BMI, central obesity, and some  
23 non-communicable diseases.  
24 The prevalence of anemia among older adults in an urban district in China in the  
25 current study was 15.43%, which was higher than the 12.86% reported in previous  
26 national studies in China,<sup>11</sup> but lower than the 18.90% reported in the 2009 national  
27 survey in China.<sup>13</sup> The difference in prevalence rates among these studies may have  
28 been caused by differences in study design, sample size, and/or the age of the study  
29 participants.

30 The current study found a significant negative correlation between anemia  
31 prevalence and educational level. This was consistent with studies conducted in Nepal  
32 and Pakistan, which confirmed that a low educational level was a risk factor for  
33 anemia.<sup>28</sup> This relationship probably occurs because higher levels of education enable  
34 people to earn more and thus escape from the poverty trap. Multivariate analysis also  
35 identified older age as an independent risk factor for anemia, consistent with the  
36 findings of other related studies.<sup>3, 29</sup> The prevalence of anemia increased with age,  
37 with a two-to-three-fold increase (26.89% vs. 12.72%) in people aged > 80 years,  
38 suggesting the need for routine screening for anemia in this high-risk subgroup.

39 Current smokers had a lower risk of anemia than never smokers. Similarly,  
40 previous researches revealed that smoking was decrease the risk of anemia.<sup>15,30</sup>  
41 Sharma and co-researchers found that women aged 35-49 years who were current  
42 smokers had a 25% lower risk of anemia compared with non-smokers, after adjusting  
43 for the covariates.<sup>30</sup> Elevated Hb levels in smokers were associated with elevated

1  
2  
3  
4  
5  
6  
7  
8  
9  
10  
11  
12  
13  
14  
15  
16  
17  
18  
19  
20  
21  
22  
23  
24  
25  
26  
27  
28  
29  
30  
31  
32  
33  
34  
35  
36  
37  
38  
39  
40  
41  
42  
43  
44  
45  
46  
47  
48  
49  
50  
51  
52  
53  
54  
55  
56  
57  
58  
59  
60

1 carboxyhemoglobin (HbCO), a stable compound of Hb and carbon monoxide (CO),  
2 due to exposure to excess CO as a result of smoking.<sup>31</sup> The form of HbCO reduces  
3 oxygen delivery, and smokers had compensatory elevated Hb to increase  
4 erythropoiesis and maintain oxygen transportation.<sup>32</sup> This might explain why  
5 adaptation to excess CO during smoking was shown by increase in Hb and red blood  
6 cell mass.<sup>33</sup> Habitual drinking was also associated with a decreased risk of anemia,  
7 with a corresponding *OR* of 0.81, consistent with a Korean study.<sup>15</sup> However, the  
8 direct causality of this negative correlation between alcohol drinking and anemia is  
9 still unclear.<sup>15</sup> Given the potential risks of alcohol and tobacco consumption to human  
10 health, we do not recommend increasing alcohol consumption or smoking to protect  
11 against anemia.

12 We also found a negative association between increased BMI and anemia  
13 prevalence, in accord with other studies conducted in China, the United States, Nepal,  
14 and Pakistan.<sup>28, 34</sup> The reasons for being underweight may include poor distribution of  
15 inadequate food within the family, food insecurity, poverty, and micronutrient  
16 deficiencies, which tend to coexist with other macronutrient deficiencies. The  
17 underlying mechanism accounting for the significant negative association between  
18 overweight or obesity and anemia risk is unclear; however there are several possible  
19 explanations. First, obese participants are less likely to be malnourished, because  
20 excess calorie intake leads to obesity,<sup>35</sup> and overnutrition in obese participants may  
21 thus be associated with a significant reduction in anemia risk. Second, obese  
22 participants may have a variety of other diseases that could increase Hb levels, such  
23 as obstructive sleep apnea and other obesity-related breathing disorders, which lead to  
24 chronic tissue hypoxia and increased red blood cells.<sup>36</sup>

25 We found that older people with diabetes had higher rates of anemia than  
26 non-diabetics, consistent with previous studies.<sup>37</sup> Evidence indicates that the  
27 incidence and prevalence of anemia in diabetic patients is often associated with  
28 erythropoietin deficiency caused by diabetic kidney damage.<sup>38</sup> Other researchers have  
29 also shown a link between anemia and hypertension, as shown in our current study.<sup>22</sup>

30 This study showed that the prevalence of anemia was low among individuals with  
31 dyslipidemia. A study by Zaribaf et al. found a significant positive correlation  
32 between Hb levels and dyslipidemia.<sup>39</sup> However, this study differed from our study in  
33 that it assessed the relationship between anemia and lipids in premenopausal women,  
34 whereas our study focused on older adults (aged 65–113 years).<sup>39</sup> In contrast, a study  
35 conducted by other researchers in women of childbearing age found no significant  
36 association between serum LDL and anemia.<sup>39</sup> The reasons for the different results in  
37 terms of the relationship between dyslipidemia and anemia deserve further  
38 investigation. Patients with CKD have defects in renal endocrine function, resulting in  
39 decreased erythropoietin secretion by the kidney, leading to nephrogenic anemia.<sup>40</sup>  
40 Nearly half of all patients with CKD have anemia.<sup>40</sup> The current study found the  
41 similar results.

42 This study had some limitations. First, it was a cross-sectional study and could only  
43 infer correlation, not causation. Second, randomized sampling would represent the  
44 best design for testing the prevalence of anemia and its associated factors among older

1 adults; however, large random sampling was not practically feasible and we therefore  
2 adopted a convenient sampling method to recruit older adult participants. This was a  
3 major factor preventing the extrapolation of the results to the general population.  
4 Finally, renal disease was assessed based on a one-time GFR measurement, possibly  
5 leading to overestimation of the actual prevalence of CKD. However, these  
6 limitations do not affect the significance of the results, which provide the first  
7 evidence of the prevalence and risk factors of anemia among older adults in urban  
8 China.

## 9 **5. Conclusion**

10 In conclusion, anemia is prevalent among the older adult population in China,  
11 with older age, underweight, diabetes, and CKD being positively associated with  
12 anemia, and higher education level, current-smoker, drinker, overweight, obesity,  
13 central obesity, hypertension, and dyslipidemia being negatively associated.  
14 Screening of high-risk populations, and treatment of senile anemia should be top  
15 priorities in Shenzhen, and should be listed as important public health intervention  
16 measures for implementation.

## 20 **Acknowledgments**

21 We are grateful to all the volunteers for their participation in the present study,  
22 and to all the investigators for their support and hard work during this survey.

## 24 **Author Contributions**

25 WN, XY, and JX: study conception and design. WN, XY, YS, HZ, YZ, and JX:  
26 performance of research. XY and YS: data analysis and interpretation. WN and XY:  
27 writing the original draft. WN and JX: Writing the review and editing. All authors  
28 have read and agreed to the published version of the manuscript.

## 30 **Funding**

31 This study was supported by the Science and Technology Planning Project of  
32 Shenzhen City, Guangdong Province, China (Grant No. JCYJ20180703145202065),  
33 the Science and Technology Planning Project of Shenzhen City, Guangdong Province,  
34 China (Grant No. KCXFZ20201221173600001), Shenzhen Medical Key Discipline  
35 Construction Fund, and Sanming Project of Medicine in Shenzhen (Grant No.  
36 SZSM201811093).

## 38 **Conflicts of Interest**

39 The authors declare no conflict of interest.

## 41 **Patient consent for publication**

42 Not required.

## 1 Ethics approval

2 This study was approved by the ethical review committee of the Center for  
3 Chronic Disease Control of Shenzhen.

## 4 Data sharing statement

5 All data generated or analyzed during this study are included in this published  
6 article. No additional data are available.

## 7 References

- 8 1. Working Group on "Expert Consensus on nutrition Prevention and Treatment  
9 of Iron deficiency Anemia" of Chinese Nutrition Society. Expert consensus on  
10 nutrition prevention and treatment of iron deficiency anemia. *Acta Nutrimenta  
11 Sinica* **2019**; 41,417-426.
- 12 2. Stevens GA, Finucane MM, De-Regil LM, *et al.* Global, regional, and national  
13 trends in haemoglobin concentration and prevalence of total and severe  
14 anaemia in children and pregnant and non-pregnant women for 1995-2011: a  
15 systematic analysis of population-representative data. *Lancet Glob Health*  
16 **2013**; 1, e16-25.
- 17 3. Bianchi VE. Role of nutrition on anemia in elderly. *Clin Nutr ESPEN* **2016**;  
18 11, e1-e11.
- 19 4. Wu WC, Rathore SS, Wang Y, *et al.* Blood transfusion in elderly patients with  
20 acute myocardial infarction. *N Engl J Med* **2001**; 345, 1230-1236.
- 21 5. Groenveld HF, Januzzi JL, Damman K, *et al.* Anemia and mortality in heart  
22 failure patients a systematic review and meta-analysis. *J Am Coll Cardiol*  
23 **2008**, 52, 818-827.
- 24 6. Ezekowitz JA MF, Armstrong PW. Anemia is common in heart failure and is  
25 associated with poor outcomes: insights from a cohort of 12065 patients with  
26 new-onset heart failure. *Circulation* **2003**; 107, 223-225.
- 27 7. Penninx BW, Guralnik JM, Onder G, *et al.* Anemia and decline in physical  
28 performance among older persons. *Am J Med* **2003**; 115, 104-110.
- 29 8. Penninx BW, Pahor M, Cesari M, *et al.* Anemia is associated with disability  
30 and decreased physical performance and muscle strength in the elderly. *J Am  
31 Geriatrics Soc* **2004**; 52, 719-724.
- 32 9. Cesari M, Penninx BW, Lauretani F, *et al.* Hemoglobin levels and skeletal  
33 muscle: results from the InCHIANTI study. *J Gerontol A Biol Sci Med Sci*  
34 **2004**;59:249-254.
- 35 10. National Bureau of Statistics. Bulletin of the Seventh National Population  
36 Census (No. 5).  
37 [http://www.stats.gov.cn/tjsj/tjgb/rkpcgb/qgrkpcgb/202106/t20210628\\_181882](http://www.stats.gov.cn/tjsj/tjgb/rkpcgb/qgrkpcgb/202106/t20210628_1818824.html)  
38 [4.html](http://www.stats.gov.cn/tjsj/tjgb/rkpcgb/qgrkpcgb/202106/t20210628_1818824.html). Accessed September 26 **2021**
- 39 11. Qin T, Yan M, Fu Z, *et al.* Association between anemia and cognitive decline  
40 among Chinese middle-aged and elderly: evidence from the China health and  
41  
42  
43  
44



- 1 retirement longitudinal study. *BMC Geriatr* **2019**; 19, 305.
- 2  
3  
4 12. Chang J, Wang Y. Reports of China Nutrition and Health Survey (2010–2013).  
5 Peking University Medical Press Co. LTD, Beijing, **2016**.
- 6  
7 13. Xu X, Hall J, Byles J, *et al*. Dietary pattern, serum magnesium, ferritin,  
8 C-reactive protein and anaemia among older people. *Clin Nutr* **2017**; 36,  
9 444-451.
- 10  
11 14. Wu Y, Ye H, Liu J, *et al*. Prevalence of anemia and sociodemographic  
12 characteristics among pregnant and non-pregnant women in southwest  
13 China: a longitudinal observational study. *BMC Pregnancy Childbirth* **2020**;  
14 20, 535.
- 15  
16 15. Chun MY, Kim JH, Kang JS. Relationship between Self-Reported Sleep  
17 Duration and Risk of Anemia: Data from the Korea National Health and  
18 Nutrition Examination Survey 2016-2017. *Int J Environ Res Public Health*  
19 **2021**; 18:4721.
- 20  
21 16. Ruan Y, Guo Y, Kowal P, *et al*. Association between anemia and frailty in  
22 13,175 community-dwelling adults aged 50 years and older in China. *BMC*  
23 *Geriatr* **2019**; 19:327.
- 24  
25 17. Zhang Q, Qin G, Liu Z, *et al*. Dietary Balance Index-07 and the Risk of  
26 Anemia in Middle Aged and Elderly People in Southwest China: A Cross  
27 Sectional Study. *Nutrients* **2018**; 10, 162.
- 28  
29 18. Zhang L, Wang F, Wang L, *et al*. Prevalence of chronic kidney disease in  
30 China: a cross-sectional survey. *Lancet* **2012**; 379, 815-822.
- 31  
32 19. Zhang M, Liu S, Yang L, *et al*. Prevalence of smoking and knowledge about  
33 the smoking hazards among 170,000 Chinese adults: a nationally  
34 representative survey in 2013-2014. *Nicotine Tob Res* **2019**; 21, 1644-1651.
- 35  
36 20. Pottel H, Hoste L, Dubourg L, Ebert N, *et al*. An estimated glomerular  
37 filtration rate equation for the full age spectrum. *Nephrol Dial Transplant*  
38 **2016**; 31,798-806.
- 39  
40 21. World Health Organization. Haemoglobin Concentrations for the Diagnosis of  
41 Anaemia and Assessment of Severity.  
42 [https://apps.who.int/iris/bitstream/handle/10665/85839/WHO\\_NMH\\_NHD\\_M](https://apps.who.int/iris/bitstream/handle/10665/85839/WHO_NMH_NHD_M)  
43 [NM\\_11.1\\_eng.pdf?ua=1](https://apps.who.int/iris/bitstream/handle/10665/85839/WHO_NMH_NHD_M). Accessed July 21 **2021**.
- 44  
45 22. Lee YG, Chang Y, Kang J, *et al*. Risk factors for incident anemia of chronic  
46 diseases: A cohort study. *PLoS One* **2019**; 14, e0216062.
- 47  
48 23. Writing Group of 2018 Chinese Guidelines for the Management of  
49 Hypertension, Chinese Hypertension League, Chinese Society of Cardiology,  
50 Chinese Medical Doctor Association Hypertension Committee, Hypertension  
51 Branch of China International Exchange and Promotive Association for  
52 Medical and Health Care, Hypertension Branch of Chinese Geriatric  
53 Medical Association. 2018 Chinese guidelines for the management of  
54 hypertension. *Chin J Cardiovasc Med* **2019**; 24, 24-56.
- 55  
56 24. Qaseem A, Wilt TJ, Rich R, *et al*. Pharmacologic Treatment of Hypertension  
57 in Adults Aged 60 Years or Older to Higher Versus Lower Blood Pressure  
58 Targets: A Clinical Practice Guideline From the American College of  
59  
60

- 1  
2  
3  
4  
5  
6  
7  
8  
9  
10  
11  
12  
13  
14  
15  
16  
17  
18  
19  
20  
21  
22  
23  
24  
25  
26  
27  
28  
29  
30  
31  
32  
33  
34  
35  
36  
37  
38  
39  
40  
41  
42  
43  
44  
45  
46  
47  
48  
49  
50  
51  
52  
53  
54  
55  
56  
57  
58  
59  
60
- 1 Physicians and the American Academy of Family Physicians. *Ann Intern Med* **2017**; 166, 430-437.
25. Wang Q, Zhang X, Fang L, *et al.* Prevalence, awareness, treatment and control of diabetes mellitus among middle-aged and elderly people in a rural Chinese population: A cross-sectional study. *PLoS One* **2018**; 13, e0198343.
26. Joint committee for guideline revision. 2016 Chinese guidelines for the management of dyslipidemia in adults. *J Geriatr Cardiol* **2018**; 15, 1-29.
27. National Health Commission of the People's Republic of China. Criteria of Weight for Adults. <http://www.nhc.gov.cn/ewebeditor/uploadfile/2013/08/20130808135715967.pdf>. Accessed September 26 **2021**
28. Harding KL, Aguayo VM, Namirembe G, *et al.* Determinants of anemia among women and children in Nepal and Pakistan: An analysis of recent national survey data. *Matern Child Nutr* **2018**; Suppl 4, e12478.
29. Fiseha T, Adamu A, Tesfaye M, *et al.* Prevalence of anemia in diabetic adult outpatients in Northeast Ethiopia. *PLoS One* **2019**; 14, e0222111.
30. Hisa K, Haruna M, Hikita N, *et al.* Prevalence of and factors related to anemia among Japanese adult women: Secondary data analysis using health check-up database. *Sci Rep* **2019**;9:17048.
31. Nordenberg D, Yip R, Binkin NJ. The effect of cigarette smoking on hemoglobin levels and anemia screening. *JAMA* **1990**;264:1556-1559.
32. Sharma AJ, Addo OY, Mei Z, *et al.* Reexamination of hemoglobin adjustments to define anemia: altitude and smoking. *Ann N Y Acad Sci* **2019**;1450:190-203.
33. Pollini G, Maugeri U, Bernardo A, *et al.* Erythrocytes parameters due to aging, smoking, alcohol consumption and occupational activity in a working population of petrochemical industry. The Pavia Study. *G Ital Med Lav* **1989**;11:237-240.
34. Qin Y, Melse-Boonstra A, Pan X, *et al.* Anemia in relation to body mass index and waist circumference among Chinese women. *Nutr J* **2013**. doi: 10.1186/1475-2891-1112-1110.
35. Dandona P, Aljada A, Chaudhuri A, *et al.* Metabolic syndrome: a comprehensive perspective based on interactions between obesity, diabetes, and inflammation. *Circulation* **2005**;111,1448-1454.
36. Schwartz AR, Patil SP, Laffan AM, *et al.* Obesity and obstructive sleep apnea: pathogenic mechanisms and therapeutic approaches. *Proc Am Thorac Soc* **2008**; 5, 185-192.
37. Gauci R, Hunter M, Bruce DG, *et al.* Anemia complicating type 2 diabetes: Prevalence, risk factors and prognosis. *J Diabetes Complications* **2017**; 31, 1169-1174.
38. Thomas MC. The High Prevalence of Anemia in Diabetes Is Linked to Functional Erythropoietin Deficiency. *Semin Nephrol* **2006**; 26, 275-282.
39. Zaribaf F, Entezari MH, Hassanzadeh A, *et al.* Association between dietary iron, iron stores, and serum lipid profile in reproductive age women. *J Educ Health Promot* **2014**; 3: DOI: 10.4103/2277-9531.127586.

1  
2  
3  
4  
5  
6  
7  
8  
9  
10  
11  
12  
13  
14  
15  
16  
17  
18  
19  
20  
21  
22  
23  
24  
25  
26  
27  
28  
29  
30  
31  
32  
33  
34  
35  
36  
37  
38  
39  
40  
41  
42  
43  
44  
45  
46  
47  
48  
49  
50  
51  
52  
53  
54  
55  
56  
57  
58  
59  
60

40. Ryu SR, Park SK, Jung JY, *et al.* The Prevalence and Management of Anemia in Chronic Kidney Disease Patients: Result from the KoreaN Cohort Study for Outcomes in Patients With Chronic Kidney Disease (KNOW-CKD). *J Korean Med Sci* **2017**; 32, 249-256.

For peer review only

## Tables

**Table 1** Sociodemographic and other characteristics of older adults living in Shenzhen community ( $N=121,981$ )

| Characteristics                   | Total           | 95%CI         |
|-----------------------------------|-----------------|---------------|
| Age (years)                       | 71.28 ± 5.58    | 71.25-71.31   |
| Hb(g/dL)                          | 13.64 ± 1.67    | 13.63-13.65   |
| BMI (Kg/m <sup>2</sup> )          | 23.83 ± 3.17    | 23.81-23.85   |
| SBP (mm Hg)                       | 134.71 ± 17.69  | 134.61-134.81 |
| DBP (mm Hg)                       | 77.23 ± 10.31   | 77.18-77.29   |
| WC (cm)                           | 85.1 ± 8.82     | 85.05-85.15   |
| FBG (mmol/L)                      | 5.96 ± 1.9      | 5.95-5.97     |
| TC(mmol/L)                        | 5.21 ± 2        | 5.20-5.23     |
| TG(mmol/L)                        | 1.57 ± 1.14     | 1.57-1.58     |
| LDL-C(mmol/L)                     | 3.09 ± 1.05     | 3.08-3.09     |
| HDL-C(mmol/L)                     | 1.39 ± 0.51     | 1.39-1.39     |
| eGFR                              | 68.74 ± 16.7    | 68.65-68.83   |
| Sex, n(%)                         |                 |               |
| Male                              | 54649 (44.07%)  | 43.78-44.34   |
| Female                            | 69358 (55.93%)  | 55.66-56.22   |
| Education level, n(%)             |                 |               |
| Not educated                      | 9888 (8.11%)    | 7.95-8.26     |
| Primary education                 | 43441 (35.61%)  | 35.34-35.88   |
| Junior school education and above | 68652 (56.28%)  | 56.00-56.56   |
| Smoking status, n (%)             |                 |               |
| Current smoker                    | 10023 (8.22%)   | 8.06-8.37     |
| Ex-smoker                         | 7546 (6.19%)    | 6.05-6.32     |
| Never-smoker                      | 104412 (85.59%) | 85.40-85.79   |
| Drinking habit, n (%)             |                 |               |
| Non-drinker                       | 101661 (83.34%) | 83.13-83.55   |
| Non-habitual drinker              | 12571 (10.31%)  | 10.14-10.48   |
| Habitual drinker                  | 7749 (6.35%)    | 6.22-6.49     |

1  
2  
3 1  
4  
5 2  
6 3 **Table 2** Prevalence of anemia in older adults living in Shenzhen community,  
7 4 according to sociodemographic and other characteristics

| Characteristics                   | Total  | Number of anemia | Prevalence of anemia(%) | 95%CI       | $\chi^2$ Value | P Value |
|-----------------------------------|--------|------------------|-------------------------|-------------|----------------|---------|
| Total                             | 121981 | 18820            | 15.43                   | 15.23-15.63 |                |         |
| Sex                               |        |                  |                         |             | 22.36          | <0.001  |
| Male                              | 53743  | 7946             | 14.79                   | 14.49-15.09 |                |         |
| Female                            | 68238  | 10874            | 15.94                   | 15.66-16.21 |                |         |
| Education level                   |        |                  |                         |             | 263.21         | <0.001  |
| Not educated                      | 9888   | 2027             | 20.50                   | 19.70-21.30 |                |         |
| Primary education                 | 43441  | 7240             | 16.67                   | 16.32-17.02 |                |         |
| Junior school education and above | 68652  | 9553             | 13.92                   | 13.66-14.17 |                |         |
| Age group                         |        |                  |                         |             | 1201.99        | <0.001  |
| 65~69                             | 60043  | 7635             | 12.72                   | 12.45-12.98 |                |         |
| 70~74                             | 32750  | 4730             | 14.44                   | 14.06-14.82 |                |         |
| 75~79                             | 16599  | 3070             | 18.50                   | 17.90-19.09 |                |         |
| 80~                               | 12589  | 3385             | 26.89                   | 26.11-27.66 |                |         |
| Smoking status                    |        |                  |                         |             | 68.89          | <0.001  |
| Current smoker                    | 10023  | 1253             | 12.50                   | 11.85-13.15 |                |         |
| Ex-smoker                         | 7546   | 1047             | 13.87                   | 13.09-14.65 |                |         |
| Never-smoker                      | 104412 | 16520            | 15.82                   | 15.60-16.04 |                |         |
| Drinking habit                    |        |                  |                         |             | 130.24         | <0.001  |
| Non-drinker                       | 101661 | 16302            | 16.04                   | 15.81-16.26 |                |         |
| Non-habitual drinker              | 12571  | 1589             | 12.64                   | 12.06-13.22 |                |         |
| Habitual drinker                  | 7749   | 929              | 11.99                   | 11.27-12.71 |                |         |
| BMI                               |        |                  |                         |             | 1522.11        | <0.001  |
| Low weight                        | 4496   | 1504             | 33.45                   | 32.07-34.83 |                |         |
| Normal weight                     | 61532  | 11041            | 17.94                   | 17.64-18.25 |                |         |
| Overweight                        | 44644  | 5175             | 11.59                   | 11.29-11.89 |                |         |
| Obesity                           | 11309  | 1100             | 9.73                    | 9.18-10.27  |                |         |
| Central obesity                   |        |                  |                         |             | 540.10         | <0.001  |
| Yes                               | 49051  | 5897             | 12.02                   | 11.73-12.31 |                |         |
| No                                | 72930  | 12923            | 17.72                   | 17.44-18.00 |                |         |
| Diabetes                          |        |                  |                         |             | 27.05          | <0.001  |
| Yes                               | 27220  | 4520             | 16.61                   | 16.16-17.05 |                |         |
| No                                | 94761  | 14300            | 15.09                   | 14.86-15.32 |                |         |
| Hypertension                      |        |                  |                         |             | 63.27          | <0.001  |
| Yes                               | 67835  | 9883             | 14.57                   | 14.30-14.83 |                |         |

1  
2  
3  
4  
5  
6  
7  
8  
9  
10  
11  
12  
13  
14  
15  
16  
17  
18  
19  
20  
21  
22  
23  
24  
25  
26  
27  
28  
29  
30  
31  
32  
33  
34  
35  
36  
37  
38  
39  
40  
41  
42  
43  
44  
45  
46  
47  
48  
49  
50  
51  
52  
53  
54  
55  
56  
57  
58  
59  
60

|              |       |       |       |             |        |        |
|--------------|-------|-------|-------|-------------|--------|--------|
| No           | 54146 | 8937  | 16.51 | 16.19-16.82 |        |        |
| Dyslipidemia |       |       |       |             | 211.72 | <0.001 |
| Yes          | 54564 | 7354  | 13.48 | 13.19-13.76 |        |        |
| No           | 67417 | 11466 | 17.01 | 16.72-17.29 |        |        |
| CKD          |       |       |       |             | 624.34 | <0.001 |
| Yes          | 37927 | 7574  | 19.97 | 19.57-20.37 |        |        |
| No           | 84054 | 11246 | 13.38 | 13.15-13.61 |        |        |

1 A two-sided value of  $P < 0.05$  was considered to be statistically significant.

2  
3  
4  
5  
6  
7  
8  
9  
10  
11  
12  
13  
14  
15  
16  
17  
18  
19

For peer review only

1  
2  
3  
4  
5  
6  
7  
8  
9  
10  
11  
12  
13  
14  
15  
16  
17  
18  
19  
20  
21  
22  
23  
24  
25  
26  
27  
28  
29  
30  
31  
32  
33  
34  
35  
36  
37  
38  
39  
40  
41  
42  
43  
44  
45  
46  
47  
48  
49  
50  
51  
52  
53  
54  
55  
56  
57  
58  
59  
60

1

2 **Figure legends**

3 Fig 1 Risk factor analyses of the prevalence of anemia in older adults living in  
4 Shenzhen community

For peer review only

| Characteristics                   | AOR(95%CI)       |
|-----------------------------------|------------------|
| <b>Gender</b>                     |                  |
| Female                            | 1                |
| Male                              | 1.00 (0.97–1.04) |
| <b>Education level</b>            |                  |
| Not educated                      | 1                |
| Primary education                 | 0.89 (0.84–0.94) |
| Junior school education and above | 0.72 (0.68–0.76) |
| <b>Age group</b>                  |                  |
| 65~69                             | 1                |
| 70~74                             | 1.10 (1.06–1.15) |
| 75~79                             | 1.37 (1.31–1.44) |
| 80~                               | 1.96 (1.86–2.06) |
| <b>Smoking status</b>             |                  |
| Never-smoker                      | 1                |
| Current smoker                    | 0.84 (0.78–0.89) |
| Ex-smoker                         | 1.00 (0.93–1.08) |
| <b>Drinking habit</b>             |                  |
| Non-drinker                       | 1                |
| Non-habitual drinker              | 0.86 (0.81–0.92) |
| Habitual drinker                  | 0.81 (0.75–0.87) |
| <b>BMI</b>                        |                  |
| Normal weight                     | 1                |
| Underweight                       | 2.06 (1.93–2.20) |
| Overweight                        | 0.67 (0.64–0.70) |
| Obesity                           | 0.57 (0.53–0.61) |
| <b>Central obesity</b>            |                  |
| No                                | 1                |
| Yes                               | 0.86 (0.82–0.89) |
| <b>Diabetes</b>                   |                  |
| No                                | 1                |
| Yes                               | 1.23 (1.19–1.28) |
| <b>Hypertension</b>               |                  |
| No                                | 1                |
| Yes                               | 0.86 (0.83–0.89) |
| <b>Dyslipidemia</b>               |                  |
| No                                | 1                |
| Yes                               | 0.81 (0.78–0.84) |
| <b>CKD</b>                        |                  |
| No                                | 1                |
| Yes                               | 1.41 (1.36–1.46) |

For peer review only



**STROBE 2007 (v4) Statement—Checklist of items that should be included in reports of *cross-sectional studies***

| Section/Topic                | Item # | Recommendation                                                                                                                                                                       | Reported on page # |
|------------------------------|--------|--------------------------------------------------------------------------------------------------------------------------------------------------------------------------------------|--------------------|
| <b>Title and abstract</b>    | 1      | (a) Indicate the study’s design with a commonly used term in the title or the abstract                                                                                               | Page 1             |
|                              |        | (b) Provide in the abstract an informative and balanced summary of what was done and what was found                                                                                  | Page 2             |
| <b>Introduction</b>          |        |                                                                                                                                                                                      |                    |
| Background/rationale         | 2      | Explain the scientific background and rationale for the investigation being reported                                                                                                 | Page 4             |
| Objectives                   | 3      | State specific objectives, including any prespecified hypotheses                                                                                                                     | Page 4             |
| <b>Methods</b>               |        |                                                                                                                                                                                      |                    |
| Study design                 | 4      | Present key elements of study design early in the paper                                                                                                                              | Page 4             |
| Setting                      | 5      | Describe the setting, locations, and relevant dates, including periods of recruitment, exposure, follow-up, and data collection                                                      | Page 4             |
| Participants                 | 6      | (a) Give the eligibility criteria, and the sources and methods of selection of participants                                                                                          | Page 4             |
| Variables                    | 7      | Clearly define all outcomes, exposures, predictors, potential confounders, and effect modifiers. Give diagnostic criteria, if applicable                                             | Page 5-6           |
| Data sources/<br>measurement | 8*     | For each variable of interest, give sources of data and details of methods of assessment (measurement). Describe comparability of assessment methods if there is more than one group | Page 5-6           |
| Bias                         | 9      | Describe any efforts to address potential sources of bias                                                                                                                            | Page 6             |
| Study size                   | 10     | Explain how the study size was arrived at                                                                                                                                            | Page 4             |
| Quantitative variables       | 11     | Explain how quantitative variables were handled in the analyses. If applicable, describe which groupings were chosen and why                                                         | Not applicable     |
| Statistical methods          | 12     | (a) Describe all statistical methods, including those used to control for confounding                                                                                                | Page 6             |
|                              |        | (b) Describe any methods used to examine subgroups and interactions                                                                                                                  | Not applicable     |
|                              |        | (c) Explain how missing data were addressed                                                                                                                                          | Not applicable     |
|                              |        | (d) If applicable, describe analytical methods taking account of sampling strategy                                                                                                   | Not applicable     |
|                              |        | (e) Describe any sensitivity analyses                                                                                                                                                | Not applicable     |
| <b>Results</b>               |        |                                                                                                                                                                                      |                    |

|                          |     |                                                                                                                                                                                                              |                |
|--------------------------|-----|--------------------------------------------------------------------------------------------------------------------------------------------------------------------------------------------------------------|----------------|
| Participants             | 13* | (a) Report numbers of individuals at each stage of study—eg numbers potentially eligible, examined for eligibility, confirmed eligible, included in the study, completing follow-up, and analysed            | Page 4         |
|                          |     | (b) Give reasons for non-participation at each stage                                                                                                                                                         | Not applicable |
|                          |     | (c) Consider use of a flow diagram                                                                                                                                                                           | Not applicable |
| Descriptive data         | 14* | (a) Give characteristics of study participants (eg demographic, clinical, social) and information on exposures and potential confounders                                                                     | Page 7         |
|                          |     | (b) Indicate number of participants with missing data for each variable of interest                                                                                                                          | Not applicable |
| Outcome data             | 15* | Report numbers of outcome events or summary measures                                                                                                                                                         | Page 7         |
| Main results             | 16  | (a) Give unadjusted estimates and, if applicable, confounder-adjusted estimates and their precision (eg, 95% confidence interval). Make clear which confounders were adjusted for and why they were included | Page 7         |
|                          |     | (b) Report category boundaries when continuous variables were categorized                                                                                                                                    | Page 7         |
|                          |     | (c) If relevant, consider translating estimates of relative risk into absolute risk for a meaningful time period                                                                                             | Page 7         |
| Other analyses           | 17  | Report other analyses done—eg analyses of subgroups and interactions, and sensitivity analyses                                                                                                               | Not applicable |
| <b>Discussion</b>        |     |                                                                                                                                                                                                              |                |
| Key results              | 18  | Summarise key results with reference to study objectives                                                                                                                                                     | Page 7-8       |
| Limitations              | 19  | Discuss limitations of the study, taking into account sources of potential bias or imprecision. Discuss both direction and magnitude of any potential bias                                                   | Page 8-9       |
| Interpretation           | 20  | Give a cautious overall interpretation of results considering objectives, limitations, multiplicity of analyses, results from similar studies, and other relevant evidence                                   | Page 7-9       |
| Generalisability         | 21  | Discuss the generalisability (external validity) of the study results                                                                                                                                        | Page 9         |
| <b>Other information</b> |     |                                                                                                                                                                                                              |                |
| Funding                  | 22  | Give the source of funding and the role of the funders for the present study and, if applicable, for the original study on which the present article is based                                                | Page 9         |

\*Give information separately for cases and controls in case-control studies and, if applicable, for exposed and unexposed groups in cohort and cross-sectional studies.

**Note:** An Explanation and Elaboration article discusses each checklist item and gives methodological background and published examples of transparent reporting. The STROBE checklist is best used in conjunction with this article (freely available on the Web sites of PLoS Medicine at <http://www.plosmedicine.org/>, Annals of Internal Medicine at <http://www.annals.org/>, and Epidemiology at <http://www.epidem.com/>). Information on the STROBE Initiative is available at [www.strobe-statement.org](http://www.strobe-statement.org).
